1 **SHORT TITLE:** Synthesis of GDP-L-fucose is required for stomatal closure.

2 **TITLE:** Genetic screen to saturate guard cell signaling network reveals a role of GDP-L-fucose  
3 metabolism in stomatal closure.

4 **AUTHORS**

5 Cezary Waszczak,<sup>a</sup> Triin Vahisalu,<sup>a</sup> Dmitry Yarmolinsky,<sup>b</sup> Maija Sierla,<sup>a</sup> Olena Zamora,<sup>b</sup> Marina Leal  
6 Gavarrón,<sup>a</sup> Julia Palorinne,<sup>a</sup> Ross Carter,<sup>c</sup> Ashutosh K. Pandey,<sup>b</sup> Maris Nuhkat,<sup>b</sup> Melanie Carmody,<sup>a</sup>  
7 Tuomas Puukko,<sup>a</sup> Nina Sipari,<sup>a,d</sup> Airi Lamminmäki,<sup>a</sup> Jörg Durner,<sup>e</sup> Dieter Ernst,<sup>e</sup> J. Barbro Winkler,<sup>f</sup>  
8 Lars Paulin,<sup>g</sup> Petri Auvinen,<sup>g</sup> Andrew J. Fleming,<sup>h</sup> Jarkko Salojärvi,<sup>a,i</sup> Hannes Kollist,<sup>b</sup> Jaakko  
9 Kangasjärvi,<sup>a</sup>

10 <sup>a</sup> Organismal and Evolutionary Biology Research Programme, Faculty of Biological and Environmental  
11 Sciences, Viikki Plant Science Centre, University of Helsinki, FI-00014, Helsinki, Finland

12 <sup>b</sup> Institute of Technology, University of Tartu, 50411 Tartu, Estonia

13 <sup>c</sup> Sainsbury Laboratory, University of Cambridge, Bateman Street, Cambridge, CB2 1LR, UK

14 <sup>d</sup> Viikki Metabolomics Unit, Faculty of Biological and Environmental Sciences, University of Helsinki,  
15 FI-00014 Helsinki, Finland

16 <sup>e</sup> Institute of Biochemical Plant Pathology, Helmholtz Zentrum München, German Research Center for  
17 Environmental Health, 85764 Neuherberg, Germany

18 <sup>f</sup> Research Unit Environmental Simulation, Institute of Biochemical Plant Pathology, Helmholtz  
19 Zentrum München, German Research Center for Environmental Health, 85764 Neuherberg, Germany

20 <sup>g</sup> Institute of Biotechnology, University of Helsinki, FI-00014 Helsinki, Finland.

21 <sup>h</sup> Department of Animal and Plant Sciences, University of Sheffield, Western Bank, S10 2TN Sheffield,  
22 UK

23 <sup>i</sup> School of Biological Sciences, Nanyang Technological University, 637551 Singapore, Singapore

24 The author responsible for distribution of materials integral to the findings presented in this article in  
25 accordance with the policy described in the Instructions for Authors ([www.plantcell.org](http://www.plantcell.org)) is:

26 Jaakko Kangasjärvi ([jaakko.kangasjarvi@helsinki.fi](mailto:jaakko.kangasjarvi@helsinki.fi)), University of Helsinki.

27 Corresponding author email: [jaakko.kangasjarvi@helsinki.fi](mailto:jaakko.kangasjarvi@helsinki.fi)

28 **ABSTRACT**

29 Guard cells regulate plant gas exchange by controlling the aperture of stomatal pores. The process  
30 of stomatal closure involves a multi-input signaling network that governs the activity of ion channels,  
31 which in turn regulate guard cell turgor pressure and volume. Here we describe a forward genetic  
32 screen to identify novel components involved in stomatal movements. Through an ozone-sensitivity  
33 approach combined with whole-rosette gas exchange analysis, 130 mutants of established stomatal  
34 regulators and 76 novel mutants impaired in stomatal closure were identified. One of the novel mutants  
35 was mapped to MURUS1 (MUR1), the first enzyme in *de novo* GDP-L-fucose biosynthesis. Defects in  
36 synthesis or import of GDP-L-Fuc into the Golgi apparatus resulted in impaired stomatal closure to  
37 multiple stimuli. Stomatal phenotypes observed in *mur1* were independent from the canonical guard  
38 cell signaling and instead could be related to altered mechanical properties of guard cell walls.  
39 Impaired fucosylation of xyloglucan, N-linked glycans and arabinogalactan proteins did not explain the  
40 aberrant function of *mur1* stomata, however our data suggest that the stomatal phenotypes observed in  
41 *mur1* can at least partially be attributed to defective dimerization of rhamnogalactouronan-II. In  
42 addition to providing the genetic framework for future studies on guard cell signaling, our work  
43 emphasizes the impact of fucose metabolism on stomatal movement.

## 44 INTRODUCTION

45 Stomata are epidermal pores surrounded by pairs of guard cells that balance the loss of water and  
46 uptake of CO<sub>2</sub> for photosynthesis. Guard cells respond to multiple environmental factors e.g. light, CO<sub>2</sub>  
47 concentration, drought, low humidity, pathogens and air pollutants such as ozone (O<sub>3</sub>), to optimize  
48 transpiration or prevent the entry of the pathogens into the leaf tissue. Accumulation of reactive oxygen  
49 species (ROS) in the apoplast of guard cells and subsequent activation of plasma membrane Ca<sup>2+</sup><sub>in</sub>  
50 channels are among the first events associated with execution of stomatal closure (McAinsh et al.,  
51 1996; Pei et al., 2000; Kwak et al., 2003).

52 Depending on the stimulus, the apoplastic ROS are generated by NADPH oxidases (Kwak et al., 2003;  
53 Kadota et al., 2014), apoplastic peroxidases and amine oxidases (Sierla et al., 2016), however, external  
54 application of ROS alone is sufficient to initiate the process of stomatal closure (Price, 1990; McAinsh  
55 et al., 1996; Kollist et al., 2007). Hydrogen peroxide (H<sub>2</sub>O<sub>2</sub>) is the most stable form of ROS (Waszczak  
56 et al., 2018). Apoplastic perception of H<sub>2</sub>O<sub>2</sub> involves activation of HYDROGEN  
57 PEROXIDE-INDUCED Ca<sup>2+</sup> INCREASES1 (HPCA1) leucine-rich repeat receptor kinase which is  
58 necessary for activation of Ca<sup>2+</sup><sub>in</sub> channels (Wu et al., 2020). The subsequent rise in cytoplasmic Ca<sup>2+</sup>  
59 concentration activates multiple Ca<sup>2+</sup>-dependent protein kinases (Maierhofer et al., 2014; Brandt et al.,  
60 2015) that together with OPEN STOMATA1 (OST1) kinase (Geiger et al., 2009; Lee et al., 2009)  
61 phosphorylate and activate guard cell anion channels SLOW ANION CHANNEL-ASSOCIATED1  
62 (SLAC1), QUICK-ACTIVATING ANION CHANNEL1 (QUAC1) and SLAC1 HOMOLOGUE3  
63 (SLAH3; for full list of kinases see Sierla et al., (2016)). The activation of guard cell anion channels,  
64 accompanied by deactivation of H<sup>+</sup>-ATPase1 (AHA1; Merlot et al., 2007) leads to membrane  
65 depolarization and activation of K<sup>+</sup><sub>out</sub> channels (Hedrich, 2012). The efflux of ions into the apoplast  
66 leads to a decrease of osmotic pressure inside the guard cells which provokes an efflux of H<sub>2</sub>O from the  
67 guard cell cytoplasm and vacuole. The consequent drop in guard cell turgor pressure results in closure  
68 of stomatal pores (Franks et al., 1998).

69 As evidenced by measurements of guard cell volume and turgor pressure performed in broad bean  
70 (*Vicia faba*), during stomatal opening guard cell turgor pressure rises from as low as 0.3 MPa to 5 MPa  
71 which is accompanied by a 30-40 % increase in guard cell volume (Franks et al., 2001). Importantly,  
72 the expansion and flexing of guard cells has to overcome the turgor pressure of the subsidiary cells (for  
73 a detailed discussion of the role of subsidiary cells see Lawson and Matthews, (2020)). On the other  
74 hand, stomatal closure involves a significant decrease in guard cell volume and surface area (Shope et

75 al., 2003). To allow these volume and pressure changes, the guard cell walls must have a high degree of  
76 plasticity, which must be determined by wall structure. While differences between taxa exist (Popper,  
77 2008), plant primary cell walls are typically composed of cellulose, hemicelluloses (xyloglucan, xylan,  
78 mannan), structural proteins, and pectins such as homogalactouronan (HG), rhamnogalactouronan-I  
79 (RG-I) and rhamnogalactouronan-II (RG-II) that determine the cell wall elasticity (Liepman et al.,  
80 2010). However, the relative content of these components varies between cell types and depends on  
81 the developmental stage. Moreover, the spatial distribution of different cell wall components is not  
82 uniform and reflects the mechanical needs of the respective cell type. Guard cells are an excellent  
83 example of such specialization. In comparison to epidermal cells, the guard cell walls are significantly  
84 thicker, devoid of highly methyl-esterified HG and rich in un-esterified HG (Amsbury et al., 2016;  
85 Merced and Renzaglia, 2018). The degree of methyl esterification is inversely correlated with the  
86 ability for  $\text{Ca}^{2+}$ -mediated crosslinking, which leads to a more rigid cell wall, as well as susceptibility to  
87 degradation by polygalacturonases that leads to cell wall loosening (Levesque-Tremblay et al., 2015).  
88 Plants deficient in pectin demethylesterification exhibit defects in stomatal closure (Amsbury et al.,  
89 2016) which suggests that pectin crosslinking/degradation has a profound effect on the execution of  
90 this process. Further, targeted enzymatic digestion of arabinans that typically constitute the side chains  
91 of RG-I inhibits stomatal movements, and this effect can be counteracted by subsequent digestion or  
92 depolymerization of HG (Jones et al., 2003) . Based on this observation, Jones et al., (2003) proposed  
93 a model in which the arabinan side chains of RG-I prevent crosslinking of HG strands which otherwise  
94 increases the cell wall rigidity, making it less capable to react to changes in guard cell turgor. Further,  
95 as observed already in the first half of the 20<sup>th</sup> century (see Shtein et al., (2017) for recent visualization)  
96 the cellulose microfibrils within the guard cell walls fan out radially from the pore to provide a hoop  
97 reinforcement that limits the increase in guard cell radius and promotes guard cell elongation during the  
98 stomatal opening (Woolfenden et al., 2017). Moreover, as inferred from the atomic force microscopy  
99 (AFM)-based studies of guard cells, the stiffness of guard cell walls is not uniform; the most rigid areas  
100 are localized at the poles of guard cells and ventral walls directly surrounding the pore (Carter et al.,  
101 2017). During stomatal opening the polar fixing prevents the increase in the length of stomatal complex  
102 and forces the elongating guard cells to bend, leading to an increase in pore aperture (Carter et al.,  
103 2017). Taken together, it is clear, that the mechanics of the guard cell wall has a profound role in the  
104 execution of stomatal movements (Rui et al., 2018; Woolfenden et al., 2018).

105 The synthesis of cell wall glycan polymers relies on the availability of nucleotide sugars that constitute  
106 the activated precursor forms serving as a donor of sugar moieties (Bar-Peled and O'Neill, 2011).  
107 The importance of nucleotide sugar synthesis and transport is exemplified by the requirement of  
108 GDP-L-fucose for proper growth and development (Reiter et al., 1993; Reiter et al., 1997; O'Neill et  
109 al., 2001; Van Hengel and Roberts, 2002; Rautengarten et al., 2016), resistance to pathogens (Zhang et  
110 al., 2019) and freezing tolerance (Panter et al., 2019). The synthesis of GDP-L-Fuc is initiated by  
111 GDP-D-mannose 4,6-dehydratases (GMD1) and MURUS1 (MUR1/GMD2) that catalyze the  
112 conversion of GDP-D-mannose to GDP-4-keto-6-deoxy-D-mannose (Figure 1; Bonin et al., 1997;  
113 Bonin et al., 2003). In leaf tissues, MUR1 is the major GMD isoform and the level of L-Fuc observed  
114 in cell walls of *mur1* mutants is reduced by approximately 98% as compared to wild type plants (Reiter  
115 et al., 1993). In aerial organs GMD1 is expressed only in stipules and pollen grains (Bonin et al., 2003)  
116 and plays a minimal role in the synthesis of GDP-L-Fuc in leaf tissue.

117 Plants lacking MUR1 exhibit dwarfism, reduced apical dominance, brittle stems (Reiter et al., 1993),  
118 short root phenotype (Van Hengel and Roberts, 2002), altered lignin structure and inflorescence stem  
119 development (Voxeur et al., 2017), and sensitivity to freezing (Panter et al., 2019) and pathogens  
120 (Zhang et al., 2019). The product of the MUR1-catalyzed reaction, GDP-4-keto-6-deoxy-D-mannose,  
121 serves as a substrate for the GDP-4-keto-6-deoxymannose-3,5-epimerase-4-reductases GER1 (Bonin  
122 and Reiter, 2000; Nakayama et al., 2003) and GER2 (Rhomberg et al., 2006) that complete the  
123 synthesis of GDP-L-Fuc (Figure 1). Another pathway that leads to synthesis of GDP-L-Fuc (the L-  
124 fucose salvage pathway) involves a single bifunctional enzyme L-FUCOKINASE/GDP-L-FUCOSE  
125 PYROPHOSPHORYLASE (FKGP) that converts L-Fuc to GDP-L-Fuc (Figure 1; Kotake et al., 2008).  
126 In contrast to *mur1*, the *fkgp* mutants exhibit normal growth phenotype and cell wall composition,  
127 suggesting that the L-fucose salvage pathway has a minor role in Arabidopsis (Kotake et al., 2008).

128 Following synthesis in the cytoplasm, GDP-L-Fuc is transported into the Golgi lumen by the  
129 GDP-FUCOSE TRANSPORTER1 (GFT1; Figure 1; Rautengarten et al., 2016). Knock-out mutants of  
130 GFT1 are not viable, and GFT1 knockdown plants exhibit semi-lethal phenotypes similar to those of  
131 *mur1* mutants (Rautengarten et al., 2016). Within the Golgi lumen, GDP-L-Fuc serves as a substrate for  
132 fucosyltransferases (FUT) that fucosylate components of the cell wall (Figure 1). There are 13  
133 fucosyltransferases (FUT1 – FUT13) in Arabidopsis (Sarria et al., 2001; Wilson et al., 2001), and  
134 according to the current state of knowledge, all are either confirmed or expected to localize to the Golgi  
135 membrane with the catalytic domain facing the lumen (Sarria et al., 2001; Strasser, 2016). FUTs add

**Figure 1**

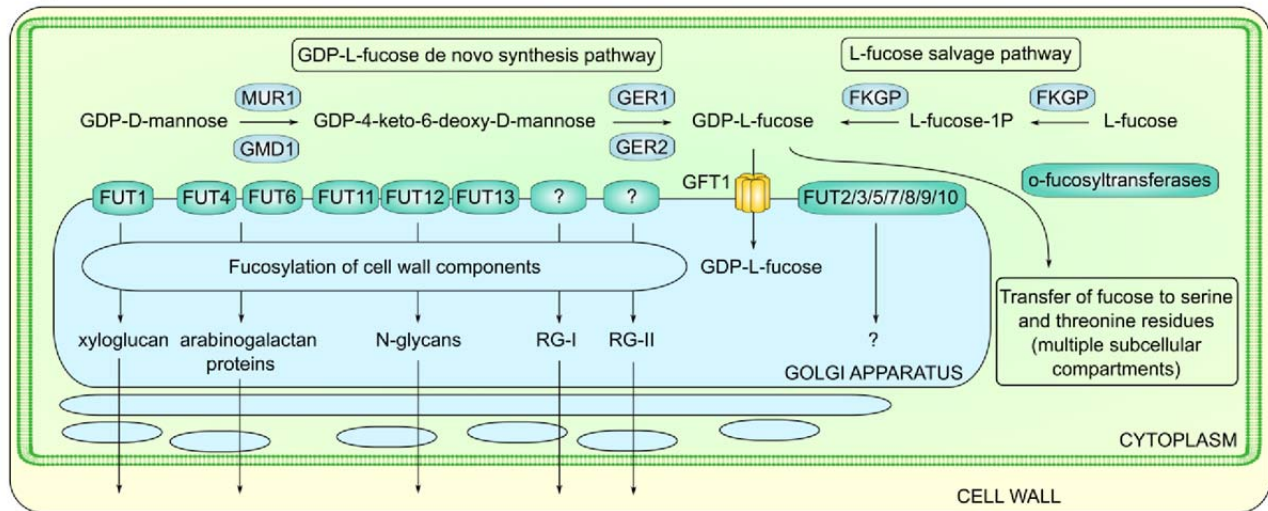

**Figure 1. Synthesis and metabolism of GDP-L-fucose in *Arabidopsis thaliana*.**

136 L-Fuc residues onto molecules such as xyloglucan (FUT1/MUR2)(Perrin et al., 1999; Vanzin et al.,  
 137 2002), arabinogalactan proteins (FUT4, FUT6; Wu et al., 2010; Liang et al., 2013; Tryfona et al., 2014)  
 138 and N-linked glycans (FUT11/FUCTA, FUT12/FUCTB, FUT13/FUCTC; Leonard et al., 2002;  
 139 Strasser et al., 2004). Furthermore, L-Fuc is found in RG-I and RG-II, although the FUTs involved in  
 140 the synthesis of these pectins are not known. In terms of quantity, the majority of L-Fuc is found in  
 141 RG-I (Anderson et al., 2012). Importantly, the dwarf phenotype of *mur1* mutants has been previously  
 142 attributed to deficiency in boron-dependent dimerization of RG-II (O'Neill et al., 2001). In *mur1*, RG-  
 143 II L-Fuc residues are replaced by L-galactose (Zabackis et al., 1996) which leads to an approximately  
 144 50% decrease in RG-II dimer formation (O'Neill et al., 2001) possibly caused by RG-II chain A  
 145 truncation (Pabst et al., 2013).

146 To understand processes controlling stomatal movements, O<sub>3</sub> can be used as an apoplastic ROS donor  
 147 to stimulate stomatal closure (Kollist et al., 2007; Vahisalu et al., 2010). Ozone enters plants through  
 148 stomata and subsequently decomposes to various ROS that further provoke active production of ROS  
 149 by plant cells (Vainonen and Kangasjärvi, 2014). Plants deficient in O<sub>3</sub>-induced stomatal closure  
 150 receive high doses of O<sub>3</sub> that trigger formation of visible hypersensitive response-like lesions. These  
 151 lesions are easy to score and allow the identification of stomatal mutants in forward genetic approaches  
 152 (Overmyer et al., 2000). Previously, such a genetic screen led to the identification of several proteins  
 153 involved in stomatal closure, i.e., SLOW ANION CHANNEL1 (SLAC1; Vahisalu et al., 2008), the



154 receptor-like pseudokinase GUARD CELL HYDROGEN PEROXIDE-RESISTANT1 (GHR1) that  
155 participates in activation of SLAC1 (Sierla et al., 2018), and HIGH TEMPERATURE1 (HT1) kinase  
156 which acts in high CO<sub>2</sub>-induced guard cell signaling as an inhibitor of SLAC1 activation (Hörak et al.,  
157 2016). Here we present an O<sub>3</sub> exposure-based forward genetic screen specifically aimed at the  
158 identification of novel components involved in stomatal closure. We report the isolation of 76 novel  
159 mutants, and 130 new mutants of established stomatal regulators. In particular, we describe the  
160 identification of the MUR1 mutant and show that synthesis and import of GDP-L-fucose into the Golgi  
161 lumen play an important role in stomatal closure. Our results are consistent with the hypothesis that the  
162 stomatal deficiencies observed in *mur1* mutants are due to altered mechanical properties of the guard  
163 cell walls, and we propose that reduced dimerization of rhamnogalactouronan-II contributes to the  
164 impaired stomatal function observed in *mur1* mutants.





166 **RESULTS**

167 **A forward genetic screen identifies novel regulators of guard cell signaling**

168 To fill the gaps in known guard cell signaling networks, we have performed forward genetic screen  
169 based on an O<sub>3</sub>-sensitivity (Figure 2). This screen is fully independent from our previous screen  
170 (Overmyer et al., 2000). A total of 125,000 seeds of Arabidopsis line pGC1:YC3.6 (Yang et al., 2008),  
171 expressing yellow cameleon 3.6 (YC3.6; Nagai et al., 2004), a biosensor probe that allows for imaging  
172 of intracellular Ca<sup>2+</sup>, were treated with ethyl methanesulfonate (EMS). Later, 380,000 M2 plants were  
173 exposed to O<sub>3</sub>. Individual plants displaying visible O<sub>3</sub>-damage were then subjected to thermal imaging  
174 and water loss assay (see Materials and Methods). The progeny of the most prominent mutants  
175 (approximately 3,200 lines) was subjected to a secondary screen utilizing the same screening methods.  
176 Lines for which at least one of the phenotypes was clearly confirmed (551 lines) were then analyzed  
177 with a whole-rosette gas exchange system (Kollist et al., 2007) to investigate stomatal responses to a  
178 variety of stimuli inducing stomatal closure i.e. apoplastic ROS (delivered by means of O<sub>3</sub>-fumigation),  
179 5 μM ABA spray, high CO<sub>2</sub> and reduced air humidity which is often termed as vapor pressure deficit  
180 (VPD; Merilo et al., 2018). Lines demonstrating lack, or impairment of stomatal responses to at least a  
181 single stimulus (206 lines) were subjected to targeted sequencing of genomic regions encoding 22  
182 well-established stomatal regulators, hereafter referred to as “*usual suspects*”, to avoid potential  
183 re-discoveries (Figure 2). The list of *usual suspects* included ion channels, ABA biosynthesis enzymes,  
184 protein kinases, phosphatases, and other proteins where the corresponding mutant lines are known to  
185 exhibit impaired stomatal closure and/or higher stomatal conductance (see Supplementary Table 1 for  
186 a full list). Approximately 60% of the tested lines (130) had mutations in coding regions of at least one  
187 *usual suspect*. Most frequently mutations were identified within *AHA1*, *GHR1* (Sierla et al., 2018),  
188 *MITOGEN-ACTIVATED PROTEIN KINASE12 (MPK12)* and *MORE AXILLARY BRANCHES2*  
189 (*MAX2*) coding sequences (Figure 2). Among the 76 mutants with no mutations in *usual suspects*, the  
190 most frequently observed stomatal phenotypes were impaired responses to elevated CO<sub>2</sub> (48 out of 76)  
191 and high loss of water from detached leaves (46 out of 76). Notably, the majority of newly identified  
192 mutants were affected in stomatal responses to more than one stimulus (Figure 2). With the exception  
193 of new alleles of HT1 and AHA1 that will be published elsewhere, all new alleles of the *usual suspects*  
194 are listed in (Supplementary Data Set 1). Due to the high number of mutant lines, we were not able to  
195 perform allelism tests for all new alleles of the *usual suspects*. However, published results (Sierla et al.,

**Figure 2**

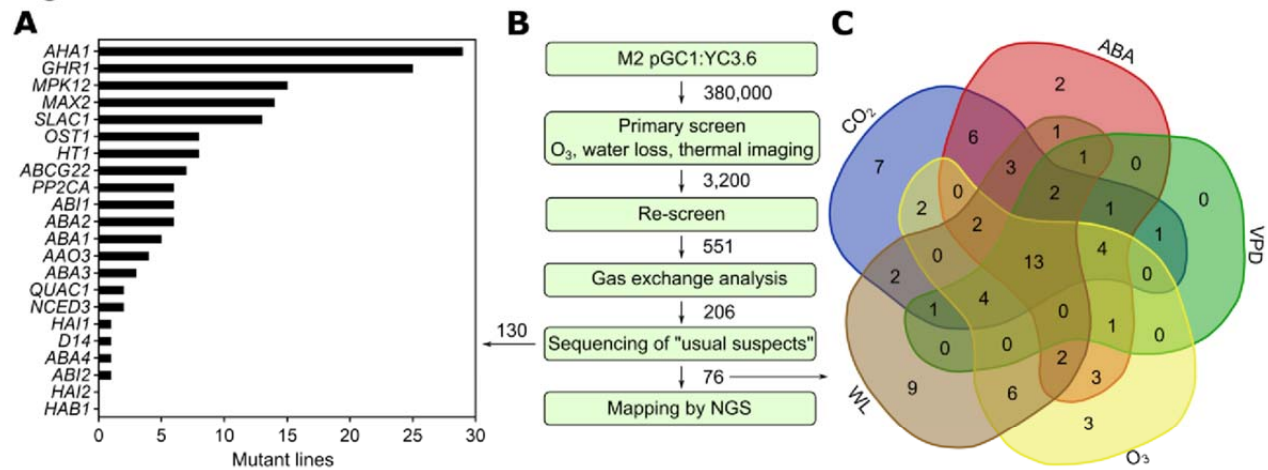

**Figure 2. Ozone sensitivity-based forward genetic screen to identify novel regulators of stomatal closure.**

(A) The amount of mutant lines of known stomatal regulators identified during candidate gene sequencing.

(B) Scheme of the screening procedure.

(C) Whole-rosette gas exchange analysis of novel mutants impaired in stomatal closure. Numbers indicate the amount of mutants impaired in stomatal closure to indicated stimuli.

196 2018), as well as currently ongoing experiments, indicate that in most of the lines the observed  
 197 phenotypes are linked to the mutations in the tested genes. Therefore, only the lines with no mutations  
 198 in the *usual suspects* were retained for further analysis.

### 199 Mapping of a novel mutant impaired in stomatal closure identifies MUR1

200 From the screen described above, mutant *T7-9* exhibited higher water loss from detached leaves (water  
 201 loss) compared to wild type (Figure 3A), and partially impaired stomatal responses to O<sub>3</sub>, high CO<sub>2</sub>  
 202 concentration, ABA, and darkness, while retaining the ability to close stomata in response to high VPD  
 203 (Supplemental Figure 1). Throughout this paper, the water loss assay, also known as “mass loss of  
 204 detached leaves, MLD” (Duursma et al., 2019) is used as a simple indicator of stomatal function (if the  
 205 cuticle permeability is intact) and has proven reliable in our previous work on stomatal signaling  
 206 (Vahisalu et al., 2008; Hörak et al., 2016; Sierla et al., 2018). To identify the causative mutation in  
 207 *T7-9*, we applied the SHOREmap backcross pipeline (Hartwig et al., 2012). For this, *T7-9* was

**Figure 3**

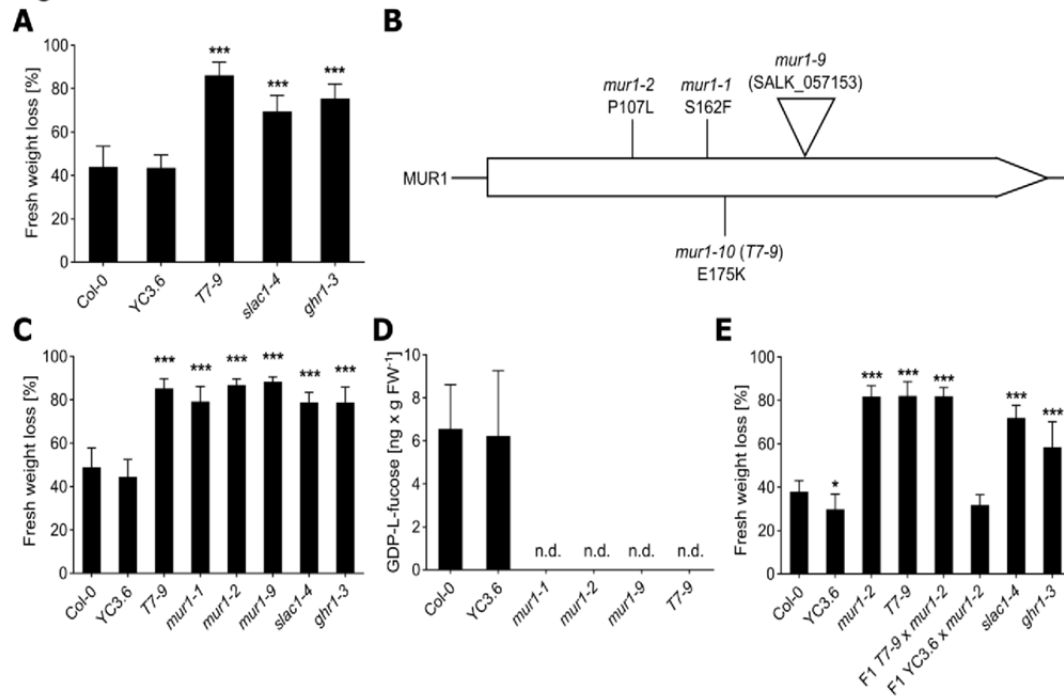

**Figure 3. Mapping of T7-9 mutant.**

(A) Leaf fresh weight loss of *T7-9* and control lines (YC3.6, Col-0, *slac1-4* and *ghr1-3*) recorded after 2h. Data bars represent means  $\pm$  SD (n = 12 plants).

(B) Positions of mutations in *mur1* mutants used in this study.

(C) Leaf fresh weight loss of *T7-9*, independent *mur1* mutants (*mur1-1*, *mur1-2*, *mur1-9*) and control lines (YC3.6, Col-0, *slac1-4* and *ghr1-3*) recorded after 2h. Data bars represent means  $\pm$  SD (n = 12 plants).

(A, C) Asterisks denote statistical differences (\*\*\*) p < 0.001) to respective control lines (Col-0 or YC3.6) according to one-way ANOVA followed by Sidak's post-hoc test.

(D) GDP-L-fucose content in *T7-9*, *mur1* mutants and respective control lines measured by UPLC-MS. Data bars represent means  $\pm$  SD (n = 4-5 plants); n.d., not detected.

(E) Leaf fresh weight loss of *T7-9*, *mur1-2*, F1 *T7-9* x *mur1-2*, F1 YC3.6 x *mur1-2* and control lines recorded after 2h. Data bars represent means  $\pm$  SD (n = 9-12 plants). Asterisks denote statistical differences (\* p < 0.05; \*\* p < 0.01; \*\*\* p < 0.001) to Col-0 according to one-way ANOVA followed by Dunnett's post-hoc test.

(A, C, E) Experiments were repeated three times with similar results. Results of the representative experiments are shown.

209 inheritance. Approximately 21% of the BC<sub>1</sub>F<sub>2</sub> plants (123 out of 593) exhibited increased water loss,  
210 indicating that the trait was determined by a single locus. Nuclear DNA from the 123 BC<sub>1</sub>F<sub>2</sub> plants  
211 displaying the mutant phenotype was bulked and subjected to next generation sequencing (NGS).  
212 Analysis of the NGS data with marker frequency threshold set to 0.9 resulted in identification of five  
213 non-synonymous EMS-specific mutations enriched in BC<sub>1</sub>F<sub>2</sub> plants displaying high water loss  
214 (Supplementary Table 2). All polymorphisms localized to the lower arm of chromosome 3 within a  
215 17.0 - 19.1 Mb physical interval. Screening of the mutant lines for the five candidate genes revealed  
216 that three independent mutant lines: *mur1-1*, *mur1-2* (Reiter et al., 1993; Bonin et al., 1997) and *mur1-*  
217 *9* (SALK\_057153, Supplementary Figure 2), carrying mutations within *AT3G51160* (Figure 3B),  
218 exhibited highly elevated water loss (Figure 3C). The mutant lines for the remaining candidate genes  
219 had WT-like water loss (Supplemental Figure 3). *AT3G51160* encodes GDP-mannose-4,6-dehydratase  
220 MURUS1 (GMD2, MUR1) which catalyzes the first step in *de novo* biosynthesis of GDP-L-Fucose  
221 (Figure 1; Bonin et al., 1997). Therefore, we investigated the level of GDP-L-Fuc in the *T7-9* mutant.  
222 Similarly to other *mur1* mutants, we were not able to detect this metabolite in *T7-9* suggesting the  
223 complete loss of MUR1 enzymatic activity (Figure 3D). Finally, an allelism test between *T7-9* and a  
224 *mur1-2* mutant revealed lack of complementation, confirming that the *T7-9* MUR1 E175K mutation  
225 (hereafter referred to as *mur1-10*) conferred its high water loss (Figure 3E).

## 226 **MUR1 is involved in stomatal development**

227 As multiple phenotypes observed in *mur1* mutants have been attributed to abnormal cell wall  
228 composition (Reiter et al., 1993; O'Neill et al., 2001; Van Hengel and Roberts, 2002), we first focused  
229 on characterizing *mur1* stomata and cuticle development. No phenotypes related to cuticle permeability  
230 were detected in any of the four *mur1* mutants by means of dye-exclusion assay (Supplemental Figure  
231 4). To assess stomatal development, we performed scanning electron microscopy-based examination of  
232 abaxial epidermis of *mur1-1* and *mur1-2* cotyledons. In agreement with an earlier report (Zeng et al.,  
233 2011), no consistent phenotype related to stomatal density was observed in *mur1* mutants. The stomatal  
234 density in *mur1-2* mutant was higher than in *mur1-1*, which had a similar stomatal density to Col-0  
235 (Supplementary Figure 5A). The average size of stomatal pores was moderately increased in the *mur1-*  
236 *1* mutant, while in *mur1-2* there were no significant differences compared to Col-0 (Supplementary  
237 Figure 5B). Notably, in both *mur1* mutants we observed a larger variability in size of stomatal pores  
238 (Supplementary Figure 5C) and the biggest stomatal complexes (2-8% of stomata, Supplementary

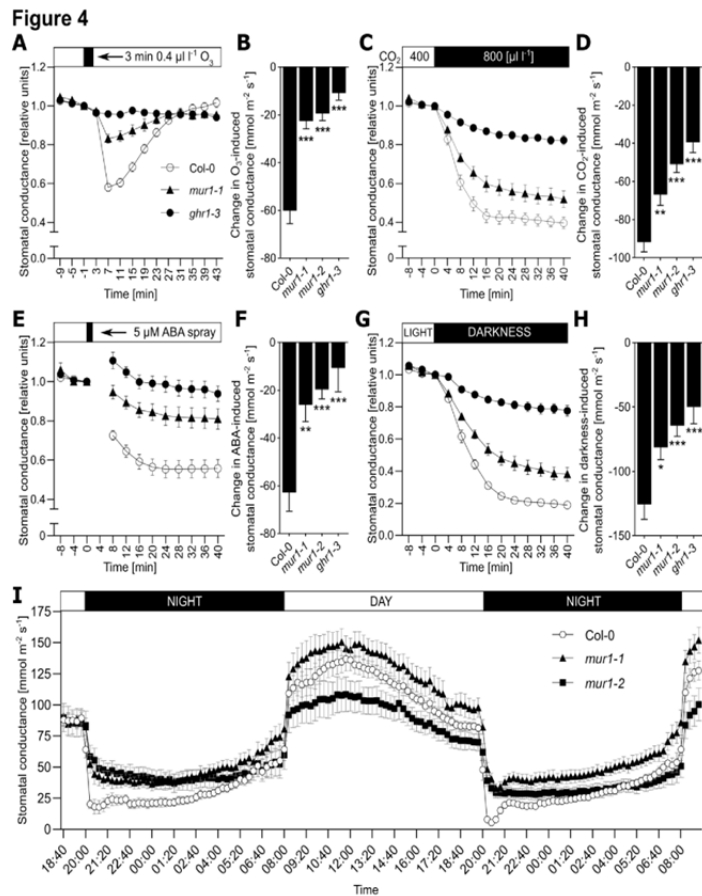

**Figure 4. Characterization of *mur1* stomatal phenotypes.**

**(A-H)** Stomatal responses of *mur1* mutants to stomata-closing stimuli. The changes in stomatal conductance are shown in relative and absolute values calculated from the data presented in Supplementary Figure 6.

**(A, C, E, G)** Time course of relative stomatal conductance (normalized to the last time point before the treatment) of 3- to 4-week-old *mur1-1*, Col-0, and *ghr1-3* plants in response to **(A)**  $\text{O}_3$  pulse, **(C)** elevated  $\text{CO}_2$ , **(E)** ABA spray and **(G)** darkness. The indicated treatments were applied at  $t = 0$  and whole-rosette stomatal conductance was recorded. Data points represent means  $\pm$  SEM;  $n = 7-10$  **(A)**, 10-12 **(C)**, 9-11 **(E)**, 6-11 **(G)** plants analyzed in two **(A, E, G)** or three **(C)** independent experiments.

**(B, D, F, H)** Changes in stomatal conductance of Col-0, *mur1-1*, *mur1-2* and *ghr1-3* in response to **(B)**  $\text{O}_3$  pulse, **(D)** elevated  $\text{CO}_2$ , **(F)** ABA spray and **(H)** darkness. Values were calculated by subtracting the initial stomatal conductance at  $t = 0$  **(D, F, H)** or  $t = -1$  **(B)** from the stomatal conductance at **(B)**  $t = 7$  min, **(D, F, H)**  $t = 40$  min. Data bars represent means  $\pm$  SEM;  $n = 7-10$  **(B)**, 10-12 **(D)**, 9-11 **(F)**, 6-11 **(H)** plants. Asterisks denote statistical differences to Col-0 (\*  $p < 0.05$ ; \*\*  $p < 0.01$ ; \*\*\*  $p < 0.001$ ) according to one-way ANOVA followed by Dunnett's post-hoc test.

**(I)** Diurnal changes in whole-rosette stomatal conductance of *mur1-1*, *mur1-2* and Col-0 plants. Data points represent means  $\pm$  SEM;  $n = 8$  plants analyzed in 3 experiments. Each experiment was started at the same time of the day and measurements were recorded for 45 h.



240 observed before (Zeng et al., 2011; Zhang et al., 2019), a fraction of *mur1* stomata exhibited aberrant  
241 structure of the outer cuticular ledge. In the most severe cases (3-17% of stomata, Supplementary  
242 Figure 5D) the outer stomatal ledges completely sealed the stomatal pores (Supplementary Figure 5F)  
243 similarly as in mutants lacking FUSED OUTER CUTICULAR LEDGE1 (FOCL1), a proline-rich  
244 protein necessary for formation of outer cuticular ledge (Hunt et al., 2017). Overall, despite the  
245 differences in stomata size and morphology, the whole plant steady state stomatal conductance of the  
246 *mur1* mutants did not differ significantly from that of the wild type plants (Supplementary Figure 1,  
247 Supplementary Figure 6, Figure 4I).

#### 248 **MUR1 is required for stomatal closure**

249 To further characterize the stomatal function in *mur1* mutants, we subjected them to a variety of  
250 treatments provoking stomatal movements and followed the time-resolved whole-rosette stomatal  
251 conductance (Kollist et al., 2007). Gas exchange measurements were performed for *mur1-1* and *mur1-2*  
252 mutants (Reiter et al., 1993; Bonin et al., 1997). For the treatments inducing stomatal closure, either  
253 *ghr1-3* (Sierla et al., 2018) or *ost1-3* (Yoshida et al., 2002) were used as non-responsive controls, while  
254 in stomata opening assays *ht1-2* (Hashimoto et al., 2006) was used. Across all gas-exchange assays,  
255 the stomatal responses of *mur1* mutants were consistent (Supplementary Figures 6 and 7), therefore,  
256 representative results obtained for *mur1-1* allele are shown (Figure 4). As observed earlier in *T7-9*,  
257 (Supplementary Figure 1) plants lacking MUR1 were impaired in the rapid transient decrease of  
258 stomatal conductance in response to a three-minute O<sub>3</sub> pulse (Figure 4A-B, Supplementary Figure 6A),  
259 that otherwise induces a rapid decrease in Col-0 plants (Kollist et al., 2007; Vahisalu et al., 2010; Sierla  
260 et al., 2018). This suggests that the activity of MUR1 is required for rapid stomatal movements in  
261 response to ROS. Further, we observed impaired stomatal closure upon treatment with elevated CO<sub>2</sub>  
262 concentration (800 μl l<sup>-1</sup>), 5 μM ABA spray or application of darkness during the light period (Figure  
263 4C-H, Supplementary Figure 6B-D). Similarly, during diurnal light/dark cycles, the transition to  
264 darkness induced a rapid drop in stomatal conductance of Col-0 plants while the *mur1* mutants  
265 exhibited a much less pronounced response, and maintained higher stomatal conductance during the  
266 darkness period (Figure 4I). In contrast to these observations, as seen earlier in *T7-9* (Supplementary  
267 Figure 1), the stomatal responses of *mur1* mutants to high VPD were not significantly different from  
268 those of Col-0 plants (Supplementary Figure 6E-F). The stimuli provoking stomatal opening, such as  
269 exposure to low CO<sub>2</sub> concentration (400 → 100 μl l<sup>-1</sup>) or increase in light intensity (150 → 500 μmol

270  $\text{m}^{-2} \text{s}^{-1}$ ), did not show any differences between *mur1* mutants and the wild type (Supplementary Figure  
271 7) suggesting that MUR1 activity is not required for stomatal opening. Taken together, our data  
272 indicate that MUR1 activity is required for normal stomatal closure in response to O<sub>3</sub>, high CO<sub>2</sub>  
273 concentration, ABA and darkness, but not for stomatal opening.

#### 274 **Import of GDP-L-fucose into the Golgi apparatus is necessary for stomatal function**

275 To further study the role of MUR1 in stomatal closure, we investigated stomatal function in mutants  
276 impaired in the subsequent steps of the GDP-L-Fuc synthesis and transport (Figure 1). For this, two  
277 T-DNA insertion mutants of GER1, (*ger1-2*, *ger1-3*) as well as GER2 (*ger2-1*, *ger2-2*) were isolated  
278 (Supplementary Figure 2B, C) and subjected to a water loss assay. None of the tested *ger* mutants  
279 exhibited elevated water loss, suggesting functional redundancy (Figure 5A). Similarly, the water loss  
280 of *fkgp* mutants (*fkgp-1*, *fkgp-2*; Kotake et al., 2008) was similar to that of Col-0 (Figure 5A) indicating  
281 that the L-fucose salvage pathway has little impact on stomatal closure. To further explore the possible  
282 redundancy between GER1 and GER2, we attempted to generate a *ger1 ger2* double mutant. To this  
283 end, *ger1-2* and *ger1-3* were crossed with *ger2-1* and *ger2-2*. However, no double homozygous plants  
284 were found in any of the four F2 families. Similarly, the F3 progeny of F2 plants homozygous for *ger1*  
285 but heterozygous for *ger2* alleles (*ger1-2<sup>-/-</sup> ger2-1<sup>+/-</sup>*; *ger1-2<sup>-/-</sup> ger2-2<sup>+/-</sup>*; *ger1-3<sup>-/-</sup> ger2-1<sup>+/-</sup>*; *ger1-3<sup>-/-</sup>*  
286 *ger2-2<sup>+/-</sup>*) did not contain double mutants. In every case, the observed segregation of *ger2* alleles  
287 (*ger2<sup>+/+</sup>* : *ger2<sup>+/-</sup>* : *ger2<sup>-/-</sup>*) within the F3 families was 1 : 1 : 0 (Supplementary Table 3). We therefore  
288 inspected both pollen viability and embryo development in F2 *ger1<sup>-/-</sup> ger2<sup>+/-</sup>* plants but did not find any  
289 abnormalities. Hence, the inability to generate *ger1 ger2* mutants might be related to defects in  
290 fertilization with *ger1<sup>-</sup> ger2<sup>-</sup>* pollen. Thus, we focused on characterization of the GDP-L-Fuc  
291 transporter GFT1.

292 Loss-of-function mutants of GFT1 are not viable, for that reason we utilized hairpin RNAi knockdown  
293 plants (hp*GFT1*; (Rautengarten et al., 2016). A total of 66 independent hp*GFT1* T1 plants were  
294 selected and transplanted to soil. As described before, the hp*GFT1* plants exhibited varying growth  
295 phenotypes, i.e., reduced projected rosette area, short petioles, and wavy leaves (Supplementary Figure  
296 8A) that correlated with the residual *GFT1* transcript level and cell wall L-Fuc content (Rautengarten et  
297 al., 2016). For each of the T1 hp*GFT1* plant that survived in soil (64 plants) we measured the projected  
298 rosette area and loss of water from detached leaves, as well as the *GFT1* transcript level (58 plants).  
299 The hp*GFT1* T1 plants exhibited varying water loss (Figure 5B) and residual *GFT1* transcript level



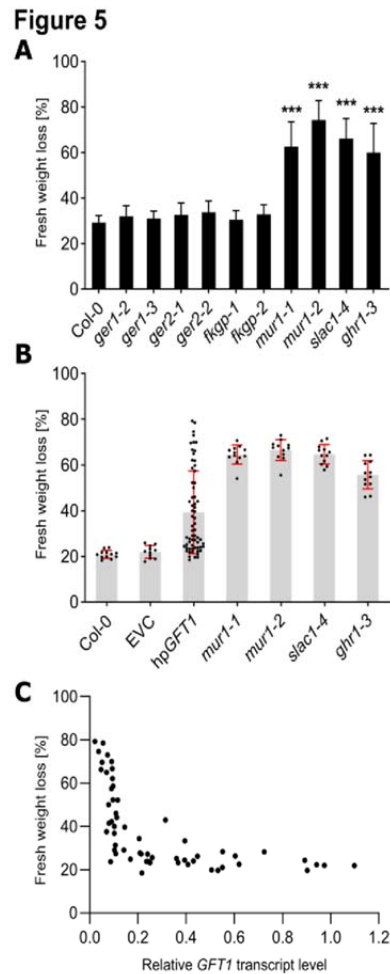

**Figure 5. Stomatal function in mutants affected in GDP-L-fucose metabolism.**

(A) Leaf fresh weight loss of mutants of genes encoding enzymes involved in synthesis of GDP-L-fucose, and control lines (Col-0, *mur1-1*, *mur1-2*, *slac1-4* and *ghr1-3*), recorded after 2h. Data bars represent means  $\pm$  SD (n = 13-16 plants). Asterisks denote statistical differences (\*\*\*) p < 0.001) to Col-0 according to one-way ANOVA followed by Dunnett's post-hoc test. Experiment was repeated three times with similar results. Results of the representative experiment are shown.

(B) Leaf fresh weight loss of 64 independent *hpGFTI* T1 plants, and control lines (Col-0, EVC – empty-vector control, *mur1-1*, *mur1-2*, *slac1-4* and *ghr1-3*), recorded after 2h. Data points represented values obtained for separate plants. Data bars represent means  $\pm$  SD (for control lines n = 11-12 plants).

(C) Correlation between residual *GFTI* transcript level and fresh weight loss observed in 58 independent *hpGFTI* T1 plants. Each dot represents values obtained for an independent *hpGFTI* T1 plant.

301 5C). Similarly, the projected rosette area was also negatively correlated with the water loss  
302 (Supplementary figure 8C). The majority of hp*GFTI* plants with *GFTI* transcript level lower than 10%  
303 of that observed in the empty vector control (EVC) displayed water loss comparable to that of *mur1*  
304 mutants (Figure 5C). Together, our data indicate that the import of GDP-L-Fuc into the Golgi lumen is  
305 important for stomatal closure.

### 306 **Lack of MUR1 affects mechanical properties of guard cell walls.**

307 To investigate the genetic interactions between MUR1 and proteins regulating canonical stomata  
308 closure pathways we crossed *mur1-1* and *mur1-2* mutants to *slac1-4* (Vahisalu et al., 2008), *aba2-11*  
309 (González-Guzmán et al., 2002), *ost2-2D* (Merlot et al., 2007), *ost1-3* (Yoshida et al., 2002) and *ghr1-3*  
310 (Sierla et al., 2018) and assayed the stomatal function of the double mutants via water loss assay. In  
311 every double mutant an additive effect of combining two mutations (Figure 6A) indicated that the  
312 phenotypes observed in *mur1* plants were independent from the canonical guard cell signaling  
313 pathways. Because of the additive effects (Figure 6A), the previously documented role of MUR1 in cell  
314 wall development (Reiter et al., 1993; Reiter et al., 1997; O'Neill et al., 2001), as well as the general  
315 deficiency in responses to stomata-closing stimuli observed in *mur1* mutants (Figure 4, Supplementary  
316 Figure 1, Supplementary Figure 6), we investigated the mechanical properties of *mur1* guard cell walls  
317 with atomic force microscopy (Carter et al., 2017). The patterning of the apparent modulus ( $E_a$ ) in the  
318 stomatal complexes of *mur1* mutants was comparable to that of the control lines. However, comparison  
319 of the absolute  $E_a$  values derived from the AFM scans indicated that *mur1* mutants had significantly  
320 stiffer subsidiary cells and this difference was even more pronounced when values obtained for guard  
321 cell walls were compared (Figure 6B). Thus, taken together, our data indicate that the stomatal  
322 phenotypes observed in *mur1* mutants are most likely related to the altered mechanical properties of the  
323 stomatal complexes.

### 324 ***mur1* stomatal phenotypes are not linked to xyloglucan structure.**

325 Xyloglucan has been previously linked to stomatal movements (Rui and Anderson, 2016). To  
326 investigate whether the phenotypes observed in *mur1* mutants might be related to the lack of  
327 xyloglucan fucosylation, we analyzed the stomatal function in mutants lacking FUT1/MUR2, the major  
328 xyloglucan fucosyltransferase (Figure 1; Vanzin et al., 2002), and KATAMARI1/MURUS3 (KAM1,  
329 MUR3) a xyloglucan galactosyltransferase (Madson et al., 2003). The cell wall fucose content in *mur2-1*,  
330 *mur3-1* and *mur3-2* mutants is reduced by approximately 50 % (Reiter et al., 1997). Unlike MUR3

**Figure 6**

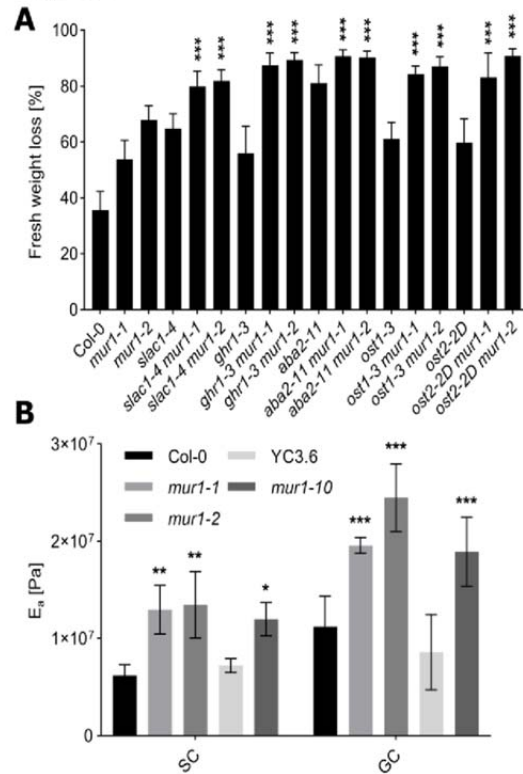

**Figure 6. Stomatal phenotypes observed in *mur1* mutants are independent from canonical guard cell signaling.**

**(A)** Leaf fresh weight loss of double mutants obtained after crossing *slac1-4*, *ghr1-3*, *aba2-11*, *ost1-3* and *ost2-2D* with *mur1-1* and *mur1-2* recorded after 1h. Data bars represent means  $\pm$  SD (n = 13-16 plants). Asterisks denote statistical differences (\*\*\*) p < 0.001) to respective single mutant lines (*slac1-4*, *ghr1-3*, *aba2-11*, *ost1-3* and *ost2-2D*) according to one-way ANOVA followed by Sidak's post-hoc test. Experiment was repeated three times with similar results. Results of the representative experiment are shown.

**(B)** Average apparent Young's modulus ( $E_a$ ) values derived from AFM scans of subsidiary cells (SC) and guard cells (GC) of control (Col-0, YC3.6) and *mur1* plants. Bars represent means  $\pm$  SD (n = 2-3 plants, 2 stomata per plant). Data analyzed with two-way repeated measures ANOVA with "genotype" and "cell type" as factors, followed by Tukey's post-hoc test. Asterisks denote statistical differences (\* p < 0.05, \*\* p < 0.01, \*\*\* p < 0.001) to respective control lines (Col-0, YC3.6) observed within a cell type.

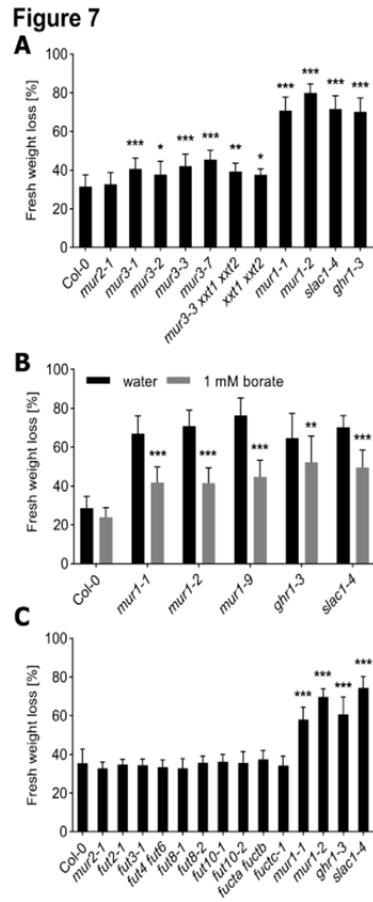

**Figure 7. Screen for fucose-containing cell wall components affecting stomatal function.**

(A) Leaf fresh-weight loss of mutants affected in fucosylation and synthesis of xyloglucan, recorded after 2h. Values obtained for Col-0, *mur1-1*, *mur1-2*, *slac1-4* and *ghr1-3* are provided for reference. Data bars represent means  $\pm$  SD (n = 15-16 plants).

(B) The effect of borate supplementation on the leaf fresh-weight loss of *mur1* mutants and control lines (Col-0, *ghr1-3* and *slac1-4*). Bars represent means  $\pm$  SD (n = 14-16 plants). Data analyzed with two-way ANOVA with “genotype” and “borate concentration” as factors, followed by Sidak’s post hoc test. Asterisks denote statistical significances (\*\* p < 0.01, \*\*\* p < 0.001) of treatment effect within each genotype. Experiment was repeated five times with similar results. Results of the representative experiment are shown.

(C) Leaf fresh-weight loss of mutants deficient in fucosyltransferases. Values obtained for Col-0, *mur1-1*, *mur1-2*, *slac1-4* and *ghr1-3* are provided for reference.

(A, C) Experiments were repeated at least 3 times with similar results. Results of the representative experiments are shown. Asterisks denote statistical differences (\* p < 0.05, \*\* p < 0.01, \*\*\*p < 0.001) to Col-0 according to one-way ANOVA followed by Dunnett’s post-hoc test.

333 activity of XYLOSYLTRANSFERASE1 (XXT1) and XXT2 leading to plants devoid of xyloglucan  
334 (Kong et al., 2015). Therefore, we assessed the stomatal function of *mur2-1*, all four *mur3* mutants, as  
335 well as a *mur3-3 xxt1 xxt2* triple mutant (Kong et al., 2015) and an *xxt1 xxt2* double mutant (Cavalier et  
336 al., 2008). The water loss of *mur2-1* was not significantly different from that observed for Col-0  
337 control, indicating that the lack of xyloglucan fucosylation does not affect the stomatal closure process  
338 (Figure 7A). All *mur3* mutants exhibited a moderately elevated water loss, however, much lower than  
339 that of *mur1* mutants. The water loss of xyloglucan-deficient *xxt1 xxt2* double mutant was similar to  
340 that of Col-0 (Figure 7A). Therefore, we concluded that the stomatal phenotypes observed in *mur1*  
341 mutants were not linked to defects in XyG fucosylation.

### 342 ***mur1* stomatal phenotypes are related to pectin structure**

343 To investigate whether the stomatal phenotypes of *mur1* were related to the dimerization of RG-II, we  
344 grew *mur1* mutants in soil supplemented with 1 mM borate. Such treatments were previously shown to  
345 compensate for the deficiency in RG-II crosslinking (O'Neill et al., 2001). We observed a significant  
346 decrease of water loss of *mur1* mutants grown in the presence of 1 mM borate as compared to the  
347 control conditions (Figure 7B). A similar trend was observed in Col-0, *slac1-4* and *ghr1-3* mutants,  
348 albeit to a much lower extent. To validate this finding, we utilized plants lacking boron transporter  
349 REQUIRES HIGH BORON1 (BOR1) required for boron xylem loading (Noguchi et al., 1997; Takano  
350 et al., 2002) as previously the impaired uptake of boron was demonstrated to affect the dimerization of  
351 RG-II (Miwa et al., 2013; Panter et al., 2019). Lack of BOR1 leads to impaired expansion of rosette  
352 leaves which can be rescued by increase of B concentration in the growth medium (Noguchi et al.,  
353 1997). We found that a soil-grown *bor1-3* mutant (Kasai et al., 2011) exhibited high water loss which  
354 could be reverted by supplementing the soil with 50  $\mu$ M borate, while lower concentrations (10  $\mu$ M  
355 and 20  $\mu$ M) had no effect (Supplementary Figure 9). Thus, the data supported the hypothesis that the  
356 phenotypes observed in *mur1* plants were related to a deficiency in RG-II crosslinking.

357 To further investigate the role of RG-II in stomatal closure, we analyzed the stomatal function of  
358 mutants lacking other enzymes involved in RG-II biosynthesis. The structure of RG-II is highly  
359 complex and in Arabidopsis only few enzymes involved in its synthesis have been identified  
360 (Funakawa and Miwa, 2015). Thus far, apart from enzymes involved in synthesis or transport of GDP-  
361 L-Fuc, the following proteins have been shown to play a role in RG-II synthesis:  
362 RHAMNOGALACTURONAN XYLOSYLTRANSFERASE1 (RGXT1), RGXT2 (Egelund et al.,

363 2006), RGXT3 (Egelund et al., 2008), RGXT4/MGP4 (Liu et al., 2011) catalyzing the transfer of D-  
364 xylose onto L-fucose, KDO-8-P SYNTHASE1 (*AtKDSA1*) and *AtKDSA2*, required for synthesis of 3-  
365 deoxy-d-manno-octulosonate (KDO; Matsuura et al., 2003; Delmas et al., 2008); and GOLGI GDP-L-  
366 GALACTOSE TRANSPORTER1 (GGLT1) required for import of GDP-L-galactose into the Golgi  
367 apparatus (Sechet et al., 2018). Deficiency in RGXT4 or KDSA activity leads to defective pollen tube  
368 formation, preventing the generation of mutant lines (Delmas et al., 2008; Liu et al., 2011). Therefore,  
369 we investigated the water loss of plants deficient in RGXT1 (*rgxt1-1*), RGXT2 (*rgxt2-1*; Egelund et al.,  
370 2006), KDSA1 (*AtkdsA1-S*), KDSA2 (*AtkdsA2-S*; Delmas et al., 2008) and three GGLT1 RNAi  
371 knockdown lines (Sechet et al., 2018); but no elevated water loss was observed in any of the tested  
372 lines (Supplementary Figure 10). It should be noted that, under our growth conditions, none of the  
373 tested mutants phenocopied the *mur1* rosette phenotype, which suggests functional redundancy  
374 between the members of the respective gene families (Delmas et al., 2008) or different structural  
375 consequences for the cell wall caused by the alterations of RG-II composition in the respective mutants.

376 In addition, we investigated whether *mur1* stomatal phenotypes might be related to lack of fucosylation  
377 of other cell wall components. For this, we measured water loss of mutants deficient in FUT4 and  
378 FUT6 (*fut4 fut6*; Tryfona et al., 2014), FUT11 and FUT12 (*fucta fuctb*; Strasser et al., 2004), FUT13  
379 (*fuctc-1*; Rips et al., 2017) as well as other fucosyltransferases with yet unidentified targets for which  
380 the mutant lines were available: *fut2-1*, *fut3-1*, *fut8-1*, *fut8-2*, *fut10-1* and *fut10-2* (Supplementary  
381 Figure 11). We did not detect *FUT9* transcript in 2-week-old seedlings, and at the time of the analysis  
382 no mutant lines for FUT5 and FUT7 were available, therefore FUT5, FUT7 and FUT9 were not  
383 included in these experiments. The water loss of *fut4 fut6*, *fucta fuctb* and *fuctc-1* mutants was  
384 comparable to that of Col-0 (Figure 7C), suggesting that *mur1* stomatal deficiencies are not related to  
385 lack of fucosylation of arabinogalactan proteins or N-linked glycans. Similarly, mutants of the  
386 remaining fucosyltransferases did not show elevated water loss, which likely reflects a high degree of  
387 functional redundancy within the FUT family.

388



## 389 **DISCUSSION**

### 390 **Forward genetic screen identifies new components of guard cell signaling network**

391 Stomatal movements are coordinated by multiple signaling pathways that converge to regulate the  
392 activity of guard cell tonoplast and plasma membrane ion channels. Over the last three decades, many  
393 components of guard cell signaling networks have been identified (Hedrich, 2012; Sierla et al., 2016;  
394 Ehonen et al., 2019; Lawson and Matthews, 2020), however multiple key components await  
395 characterization. Here we describe a forward genetic screen that aims to saturate the gene network  
396 controlling stomatal closure. Our results indicate that the current gene network is far from complete as  
397 we identified 76 mutants affected in stomatal closure (Figure 2) that do not represent mutations in any  
398 of the 22 well-established stomatal regulators. The majority of the novel mutants were impaired in  
399 stomatal closure to several stimuli, however mutants deficient in responses to a single stimulus e.g.  
400 apoplastic ROS generated by O<sub>3</sub> exposure, or CO<sub>2</sub> were also identified (Figure 2). We expect that  
401 future characterization of the newly identified mutants will provide insight into global, and stimuli-  
402 specific regulation of stomatal closure. As expected, apart from identifying novel mutants, our  
403 screening strategy yielded 130 new mutants of genes encoding known stomatal regulators  
404 (Supplementary Data Set 1). Mutations in *AHAI*, *GHR1*, *MPK12* and *MAX2* (Figure 2) were the most  
405 prevalent, which might emphasize the significance of these genes in stomatal closure or the importance  
406 of intact protein sequence for the whole-protein function. New alleles of the *usual suspects* described  
407 here can act as a useful resource for detailed studies of their molecular function. Recently we used 10  
408 novel alleles of *GHR1* to dissect the role of specific mutations on its function and stability (Sierla et al.,  
409 2018). Currently, we are investigating the newly identified mutants of *AHAI* and *HTI* to get a deeper  
410 insight into their mode of action. An unexpected finding was the identification of multiple novel alleles  
411 of *MAX2* (Supplementary Data Set 1). *MAX2* is mostly recognized for its role in strigolactone  
412 signaling (Waters et al., 2017) and has been previously implicated in guard cell functions (Ha et al.,  
413 2014; Piisilä et al., 2015) that are likely independent from SLs signaling (Kalliola et al., 2020).  
414 However, our data suggests that the role of *MAX2* in stomatal closure might be more central than  
415 previously realized. In conclusion, our work provides genetic resources that enable further studies of  
416 established stomatal regulators. Furthermore, mapping of newly identified mutants will contribute to  
417 saturation of the genetic landscape of stomatal regulation.

### 418 **Synthesis and import of GDP-L-fucose into the Golgi is necessary for stomatal closure**



419 At the organellar/cellular level, the flux of water through the guard cell tonoplast and plasma  
420 membranes results in changes in volume and surface area of guard cells (Franks et al., 2001; Shope et  
421 al., 2003; Meckel et al., 2007) and their central vacuoles (Diekmann et al., 1993; Gao et al., 2005).  
422 Stomatal opening involves an increase in guard cell turgor (Franks et al., 2001), volume, and surface  
423 area that in turn lead to an increase in guard cell length (Meckel et al., 2007). Contrary to stomatal  
424 opening, stomatal closure involves guard cell shrinking. However, it is not entirely understood how the  
425 repetitive, and fast changes in guard cell wall surface area are executed during stomatal movements.  
426 According to current understanding, this process relies on the flexibility of the cell wall matrix which is  
427 determined during guard cell morphogenesis (Rui et al., 2018), and is presumably promoted by the  
428 turgor pressure of the subsidiary cells. Data available thus far point towards the key role of the pectin  
429 network in controlling the cell wall flexibility that enables stomatal movements, and results presented  
430 in this study support this hypothesis. The first mutant characterized from the screen described here  
431 corresponds to MUR1 - an enzyme catalyzing the first step in *de novo* GDP-L-Fuc synthesis pathway  
432 (Bonin et al., 1997). Plants lacking GDP-L-Fuc exhibited high loss of water from detached leaves and  
433 impaired responses to apoplastic ROS, ABA, darkness and high CO<sub>2</sub> concentration (Figure 4,  
434 Supplementary Figures 1 and 6). Elevated water loss was also observed in plants impaired in import of  
435 GDP-L-Fuc into Golgi apparatus (Figure 5B-C). Therefore, we conclude that not just the synthesis, but  
436 also the import of GDP-L-Fuc into the Golgi lumen is necessary for stomatal closure. Recently, *mur1*  
437 mutants were also shown to lack stomatal responses to treatment with *Pseudomonas syringae* (*Pst*  
438 DC3118) and salicylic acid (Zhang et al., 2019). The stomatal defects observed in *mur1* appear  
439 independent from canonical guard cell signaling pathways (Figure 6A) and instead stem from defects in  
440 cellular metabolism.

441 The Golgi apparatus (GA) serves as a hub for synthesis of pectic polysaccharides which are later  
442 exported to the apoplastic space (Caffall and Mohnen, 2009). Accordingly, the fucosylation of cell wall  
443 polysaccharides, AGPs and N-linked glycans is thought to occur in the GA (Figure 1; Chou et al.,  
444 2015; Strasser, 2016) and the majority of fucose is incorporated into the cell wall via the GA-derived  
445 vesicles (Anderson et al., 2012). We found that mutants of fucosyltransferases responsible for synthesis  
446 of AGPs, N-linked glycans and xyloglucan did not exhibit elevated water loss (Figure 7 A,C), therefore  
447 we excluded the possibility that phenotypes observed in *mur1* might be linked to impaired fucosylation  
448 of these cell wall components. The partial reversion of the *mur1* water loss phenotype by borate (Figure  
449 7B), and high water loss observed in *bor1-3* mutant (Supplementary Figure 9), suggests that the

450 phenotype is linked either directly, or indirectly, to the structure and dimerization of RG-II. Earlier it  
451 was found that *mur1* mutants, even when grown under high borate conditions, had 74-78 % of RG-II in  
452 dimer form while nearly all RG-II (95%) was dimerized in Col-0 (O'Neill et al., 2001). Therefore,  
453 partial restoration of *mur1* stomatal function might be related to incomplete RG-II dimerization even  
454 after borate supplementation.

455 A complementary explanation for the observed phenotype might be related to shortening of the RG-II  
456 chain A observed in *mur1* plants (Pabst et al., 2013). As RG-II and HG share the same backbone and  
457 are covalently cross-linked (Caffall and Mohnen, 2009; Harholt et al., 2010) the shortening of the RG-  
458 II chain A might have similar consequences as digestion of RG-I arabinan side chains (as observed  
459 previously by Jones et al., (2003)). According to this scenario, the lack of GDP-L-Fuc would promote  
460 crosslinking of HG and render the guard cell walls stiffer and, thus, less responsive to changes in turgor  
461 pressure. This hypothesis is supported by our AFM data as we found that *mur1* mutants have  
462 significantly stiffer epidermal cell walls than wild type plants (Figure 6B). It is noteworthy, that  
463 mutants with highly decreased HG content, *quasimodol* (*qual*; Bouton et al., 2002) and *qua2* (Mouille  
464 et al., 2007) exhibit morphological phenotypes related to loss of cell adhesion which are not a direct  
465 consequence of decreased HG content (Verger et al., 2016). In addition to impaired development, both  
466 mutants exhibit high loss of water from detached leaves (Bouton et al., 2002; Krupková et al., 2007)  
467 however, it is yet unknown whether this phenotype is related to impaired stomatal closure.

468 One argument against the hypothesis of increased HG crosslinking comes from the observation of the  
469 stomatal opening process in *mur1* mutants. In contrast to stimuli inducing stomatal closure, *mur1*  
470 mutants responded properly to stomatal opening cues such as increase in light intensity and decrease in  
471 CO<sub>2</sub> concentration (Supplementary Figure 7), while Jones et al., (2003) observed impaired stomatal  
472 opening after the arabinanase treatment. However, a similar phenotype to that reported here, i.e.  
473 impaired closure and normal opening, was observed in plants lacking POLYGALACTURONASE  
474 INVOLVED IN EXPANSION3 (PGX3; Rui et al., 2017). Polygalacturonases constitute a large group  
475 of pectin-hydrolyzing enzymes (Yang et al., 2018). PGX3 is expressed in expanding tissues and guard  
476 cells where it controls the abundance and molecular mass of HG. PGX3 deficiency led to increased  
477 crosslinking of HG and impaired stomatal responses to ABA and darkness while the light- or  
478 fusicoccin-induced stomatal opening was not affected (Rui et al., 2017). On the basis of this phenotype

479 Rui et al., (2017) proposed a model in which the loosening of pectin structure is necessary for stomatal  
480 closure, which is supported by the results of our study.

481 The normal stomatal opening observed in *mur1* and *pgx3* mutants might be explained by the relatively  
482 low severity of phenotypes observed in these two mutants. Jones et al., (2003) reported that treatment  
483 with arabinanase completely inhibited stomatal closure, while slower and “stepwise” stomatal closure  
484 was observed in *mur1* and *pgx3* mutants, respectively. The digestion of arabinan via exogenous enzyme  
485 treatment in epidermal strips likely affects the structure of the guard cell pectin network to a much  
486 greater extent than that observed in the intact leaves of *mur1* and *pgx3* mutants, leading to a stomatal  
487 opening phenotype.

488 Because of the observed changes in mechanical properties of guard cell walls, and the independence of  
489 *mur1* stomatal phenotypes from canonical guard cell signaling pathways, we hypothesize that the  
490 impaired function of *mur1* stomata is linked to a relatively stiffer epidermis. Since stomatal movements  
491 occur in the context of a mechanical environment determined by the subsidiary cells it is possible that  
492 the increased stiffness of the subsidiary cells also contributes to the *mur1* phenotypes.

#### 493 **Alternative hypotheses and future challenges**

494 Since *mur1* mutants exhibit a radical reduction in availability of GDP-L-Fuc, additional factors may  
495 contribute to impaired function of *mur1* stomata. For example, a fraction of stomatal pores of *mur1*  
496 plants were sealed with outer cuticular ledges (Supplementary Figure 5). A similar but more severe  
497 phenotype, which was also associated with impaired stomatal closure in response to ABA, has been  
498 observed in the *focl1* mutant (Hunt et al., 2017). The precise molecular function of FOCL1 is not  
499 known, however, it has been proposed to control the mechanical properties of guard cell walls and the  
500 formation of the cuticle-cell wall bond (Hunt et al., 2017). Thus, it is tempting to speculate that, while  
501 being independent from guard cell signaling, impaired *mur1* stomatal responses might be linked to  
502 those observed in *focl1*.

503 As the majority of cell wall L-fucose is localized in RG-I (Anderson et al., 2012), the lack of  
504 fucosylation of this cell wall component might also contribute to phenotypes observed in *mur1*. To our  
505 knowledge, the identity of fucosyltransferases responsible for incorporation of L-Fuc into RG-I and  
506 RG-II remains unknown. Despite screening of multiple fucosyltransferase mutants we were not able to  
507 reproduce the *mur1* phenotype (Figure 7C), which probably reflects functional redundancy within the

508 FUT family. In support of this hypothesis, the coding sequences of multiple FUTs are highly similar  
509 and physically localized in groups (Sarria et al., 2001) which suggests that closely related FUTs arose  
510 during gene duplication and, thus, might function redundantly. Therefore, due to the current lack of  
511 genetic tools, we were unable to precisely pinpoint the cell wall components responsible for *mur1*  
512 stomatal phenotypes. Analysis of high-order mutant lines, or the application of a CRISPR-  
513 Cas/amiRNA strategy, might be suitable for identification of fucosyltransferases that fucosylate RG-I  
514 and RG-II.

515 Depletion of GDP-L-Fuc likely results also in defects in protein o-fucosylation. According to  
516 phylogenetic analysis of plant and metazoan o-fucosyltransferases, Arabidopsis POFUTs constitute a  
517 multigene family with nearly 40 members (Smith et al., 2018). Among them SPINDLY was shown to  
518 fucosylate and activate DELLA proteins (Zentella et al., 2017) and according to (Zhang et al., 2019),  
519 part of the pathogen susceptibility observed in *mur1* mutants can be explained by lack of  
520 SPINDLY-mediated protein o-fucosylation. However, we were not able to detect stomata-related  
521 phenotypes in *spy* mutant lines. Another two putative o-fucosyltransferases FRIABLE1 (FRB1) and  
522 ESMERALDA (ESMD) were shown to influence cell adhesion (Neumetzler et al., 2012; Verger et al.,  
523 2016). Similarly to *qual* and *qua2*, plants lacking FRB1 exhibit loss of cell adhesion (Neumetzler et  
524 al., 2012). Strikingly, the introduction of the *esmd* mutation into *qual*, *qua2* and *frb1* backgrounds  
525 restored their cell adhesion defects with no apparent changes in cell wall composition, implying the  
526 existence of a signaling pathway controlling cell adhesion (Verger et al., 2016). More research efforts  
527 are needed to investigate whether the above-discussed mutants are impaired in stomatal function.

528 In summary, our study reveals that the synthesis of GDP-L-fucose is necessary for stomatal closure and  
529 highlights the key role of fucose metabolism for stomatal closure. The interpretation of our data in the  
530 context of earlier observations/hypotheses (Jones et al., 2003; Amsbury et al., 2016; Rui et al., 2017)  
531 leads us to conclude that the impaired stomatal closure observed in *mur1* is linked to increased stiffness  
532 of guard cell walls which likely stems from enhanced crosslinking of HG caused by impaired structure  
533 of RG-II. While the information obtained from mutant lines reported here provides valuable indications  
534 as to which cell wall components are necessary for the execution of stomatal movements, precisely  
535 how wall structure is modified/reorganized upon perception of stomatal opening/closing stimuli to  
536 accommodate volume/pressure changes awaits future investigation.

## 537 MATERIALS & METHODS

### 538 Plant material and growth conditions

539 All *Arabidopsis thaliana* mutants used in this study were in the Col-0 genetic background. The  
540 following lines were obtained from Nottingham Arabidopsis Stock Center: *mur1-1*, *mur1-2* (Reiter et  
541 al., 1993; Bonin et al., 1997); *mur1-9* (SALK\_057153); *ger1-2* (WiscDsLox\_425G11), *ger1-3*  
542 (GK\_296H02), *ger2-1* (GK\_113G05), *ger2-2* (SALK\_091781); *mur2-1* (Reiter et al., 1997; Vanzin et  
543 al., 2002); *ghr1-3* (GK\_760C07; Sierla et al., 2018); *slac1-4* (SALK\_137265; Vahisalu et al., 2008);  
544 *ost1-3* (SALK\_008068; Yoshida et al., 2002); *mur3-7* (SALK\_127057; Tamura et al., 2005); *AtkdsA1-*  
545 *S* (SALK\_024867), *AtkdsA2-S* (SALK\_066700; Delmas et al., 2008); *rgxt1-1* (SALK\_073748), *rgxt2-1*  
546 (SALK\_023883; Egelund et al., 2006), *bor1-3* (SALK\_037312; Kasai et al., 2011), *fut2-1*  
547 (GK\_320C07), *fut3-1* (SALK\_045666), *fut8-1* (SALK\_010965), *fut8-2* (WiscDsLox\_449F06), *fut10-1*  
548 (WiscDsLox\_432A01), *fut10-2* (SALK\_020408), *fuctc-1* (SALK\_067444; Rips et al., 2017).  
549 pGC1:YC3.6 line (Yang et al., 2008) was donated by Julian Schroeder. FKGP mutants *fkgp-1*  
550 (SALK\_012400), *fkgp-2* (SALK\_053913; Kotake et al., 2008) were donated by Toshihisa Kotake;  
551 *mur3-1*, *mur3-2* (Reiter et al., 1997), *mur3-3* (SALK\_141953; Tamura et al., 2005), *xxt1*  
552 (SAIL\_785\_E02) *xxt2* (SALK\_101308) double mutant (Cavalier et al., 2008), and *xxt1 xxt2 mur3-3*  
553 triple mutant (Kong et al., 2015) were donated by Malcolm A. O'Neill; *ost2-2D* mutant (Merlot et al.,  
554 2007) was donated by Jeffrey Leung; *aba2-11* mutant (González-Guzmán et al., 2002) was donated by  
555 Pedro L. Rodríguez; *fucTA* (SALK\_087481) *fucTB* (SALK\_063355) double mutant (Strasser et al.,  
556 2004) seeds were obtained from Richard Strasser; *fut4* (SAIL\_284\_B05) *fut6* (SALK\_078357) double  
557 mutant seeds (Tryfona et al., 2014) were obtained from Paul Dupree; *snrk2.236* triple mutant seeds  
558 (Fujii and Zhu, 2009; Cui et al., 2016) were donated by Hiroaki Fujii and Kirk Overmyer; *ht1-2* mutant  
559 (Hashimoto et al., 2006) was donated by Koh Iba. All mutant lines were genotyped with gene specific  
560 primers (Supplementary Data Set 2). GGLT1 RNAi lines (Sechet et al., 2018), together with the  
561 corresponding empty-vector control, were donated by Julien Sechet and Jenny C. Mortimer; T1 seeds  
562 of hpGFTI and empty-vector control as well as *E.coli* and *Agrobacterium tumefaciens* strains carrying  
563 the hpGFTI construct in pART27 (Rautengarten et al., 2016) were obtained from Joshua L.  
564 Heazlewood. To generate hpGFTI lines, Col-0 plants were transformed via the floral-dip method with  
565 *Agrobacterium tumefaciens* strain AGL1 carrying the hpGFTI construct in pART27 vector  
566 (Rautengarten et al., 2016). T1 transformants were selected on half-strength Murashige & Skoog

567 medium (Duchefa Biochemie) supplemented with 50  $\mu\text{g ml}^{-1}$  kanamycin, in a controlled growth  
568 chambers (MLR-350, Sanyo) under 12 h light (130-160  $\mu\text{mol m}^{-2} \text{s}^{-1}$ )/12 h dark cycle, 22°C/18°C  
569 (day/night). After two weeks plants were transplanted to soil and grown for additional three weeks as  
570 described below. The same selection procedure has been applied to select for empty-vector control  
571 lines. Col-0, *mur1-1*, *mur1-2*, *slac1-4* and *ghr1-3* lines were grown in parallel, except the selection  
572 antibiotic was not included in the growth medium. The double mutants of *mur1-1* and *mur1-2* with  
573 *ost1-3*, *aba2-11*, *ghr1-3*, *slac1-4* and *ost2-2D* were generated by crossing *mur1-1* and *mur1-2* (pollen  
574 acceptors) with the respective pollen donor. Double mutants were identified in F2 generation by  
575 genotyping with gene-specific primers (Supplementary Data Set 2). An attempt to generate *ger1 ger2*  
576 double mutants was performed by crossing *ger1-2* and *ger1-3* (pollen acceptors) with *ger2-1* and *ger2-*  
577 *2* (pollen donors). Later, F2 populations were genotyped with gene-specific primers (Supplementary  
578 Data Set 2). F2 plants homozygous for *ger1* but heterozygous in *ger2* locus were allowed to self-  
579 pollinate and the F3 plants were genotyped as before to determine the segregation of *ger2* alleles.

580 Unless specified otherwise, seeds were suspended in 0.1% agarose solution, vernalized in the dark for  
581 two days at 4°C and sown on a 1:1 mixture of peat and vermiculite. Plants were grown in controlled  
582 growth rooms under 12 h light (200  $\mu\text{mol m}^{-2} \text{s}^{-1}$ )/12 h dark cycle, 22°C/18°C (day/night), 60%/70%  
583 relative humidity.

#### 584 **Mutagenesis and screening procedure**

585 Mutagenesis of Arabidopsis pGC1:YC3.6 (Yang et al., 2008) seeds was performed as described before  
586 (Kim et al., 2006). In the primary screen, M2 plants were grown for two weeks and exposed to 275-350  
587  $\text{nl l}^{-1}$   $\text{O}_3$  for 6 h. Presence of  $\text{O}_3$ -induced lesions was assessed visually, and sensitive plants were  
588 rescued. One to two weeks later, rosettes were imaged with an Optris PI450 thermal imager (Optris  
589 GmbH) and subjected to water loss assay as described below. M3 seeds were collected from the M2  
590 plants that exhibited the most pronounced phenotypes i.e. severe  $\text{O}_3$  sensitivity, high loss of water  
591 and/or low leaf temperature. Later, to confirm the inheritance of the observed phenotypes, the M3  
592 plants were exposed to 350  $\text{nl l}^{-1}$   $\text{O}_3$  for 6 h, and subjected to water loss assay. Approximately half of  
593 both, the primary and the secondary screen, was performed at the ExpoSCREEN facility (HMGU,  
594 Munich) and the remaining half at the plant growth facilities of the University of Helsinki. Lines for  
595 which at least one phenotype was reproduced, were selected for whole-rosette gas exchange-based  
596 phenotyping of stomatal function. Gas exchange measurements were performed on 2 - 4 plants per



597 mutant line and in total 551 lines were analyzed for stomatal responses to O<sub>3</sub> pulse (547 lines), elevated  
598 CO<sub>2</sub> (550 lines), darkness (106 lines), VPD (498 lines) and ABA spray (482 lines). Stomatal  
599 conductance of 505 lines was tested.

600 Lines with defective stomatal responses to at least one stimulus were subjected to sequencing of “usual  
601 suspects” either by NGS-based sequencing of PCR amplicons obtained with the use of gene-specific  
602 primers (Supplementary Data Set 2) and Phusion DNA polymerase (ThermoFisher Scientific; ROUND  
603 1 to 6), or whole-genome sequencing (ROUND 7 and 8). In the PCR-based approach, for each line,  
604 amplicons were pooled and subjected to NGS with the use of GS FLX+ system (Roche) or MiSeq  
605 system (Illumina) at DNA Sequencing and Genomics Laboratory, Institute of Biotechnology,  
606 University of Helsinki. Sequencing with the use of GS FLX+ system was performed exactly as  
607 described before (Sierla et al., 2018). For MiSeq-based sequencing, pooled amplicons were sheared  
608 (Bioruptor NGS, Diagenode) into approximately 500 bp fragments, end-repaired, A-tailed and ligated  
609 to truncated TruSeq adapters (Illumina). After purification a PCR reaction was performed to introduce  
610 full-length P5 adapter and indexed P7 adapter sequences. After PCR, all products were pooled, purified  
611 with AMPure XP (Agencourt, Beckman Coulter), size selected to 600-800 bp (as described above), and  
612 analyzed on a Fragment Analyzer (Advanced Analytical Technologies Inc., Ankeny, IA, USA). Paired-  
613 end sequencing were performed on a MiSeq using a 600 cycle kit v3 (Illumina). The obtained  
614 sequences were trimmed using Cutadapt (Martin, 2011) and assembled with SPAdes (Bankevich et al.,  
615 2012). In the whole genome sequencing approach (ROUND 7 and 8, performed at Institute for  
616 Molecular Medicine Finland, FIMM) leaf samples of approximately 10 plants per line were used for  
617 nuclear DNA isolation. Nextera Flex library preparation was performed using 50-100 ng of dsDNA  
618 according to Nextera DNA Flex Library Prep Reference Guide (Illumina, San Diego, CA, USA) with  
619 the following modifications: all reactions were performed in half of the normal volume and library  
620 normalization was done according to the concentration measured on LabChip GX Touch HT  
621 (PerkinElmer, USA). Later, 500-850 bp fragments were size selected from the pool using BluePippin  
622 (Sage Science, USA). In ROUND 7, sequencing was performed with Illumina NovaSeq 6000 system  
623 using S4 flow cell with lane divider (Illumina, San Diego, CA, USA). Read length for the paired-end  
624 run was 2x151 bp. In ROUND 8, sequencing was performed with the Illumina NovaSeq 6000 system  
625 using S1 flow cell with lane divider (Illumina, San Diego, CA, USA). Read length for the paired-end  
626 run was 2 x 101 bp. Following the data acquisition, reads were subjected to demultiplexing with  
627 Illumina bcl2fastq2.20 software.



628 Quality control of the reads was carried out using FastQC software  
629 (<https://www.bioinformatics.babraham.ac.uk/projects/fastqc/>), and the adapter removal and read  
630 trimming were performed with Trimmomatic v0.36 (Bolger et al., 2014). After removal of adaptor  
631 sequences, all bases were removed from the beginning and the end of the reads if their Phred quality  
632 score was below 20. Additionally, reads with mean Phred score <15 in a sliding window of 3 bases  
633 were clipped, and the reads with read length < 35 bp after trimming were removed. The trimmed reads  
634 were aligned to the TAIR10 version of the Arabidopsis genome using Bowtie 2 v2.2.9 (Langmead and  
635 Salzberg, 2012). Next, the sequence alignment data was converted to binary alignment file and sorted  
636 using Picard v2.5.0 (<http://broadinstitute.github.io/picard/>). The same toolbox was used for removing  
637 the read PCR duplicates and for adding read group information. Next, Genome Analysis Toolkit  
638 (GATK, <https://gatk.broadinstitute.org>) by Broad Institute was used to obtain genomic VCF files using  
639 HaplotypeCaller (Poplin et al., 2017), for combining the gVCF files, and finally for the joint calling of  
640 variants using GenotypeGVCFs. The called SNPs were annotated using snpEff v4.3t (Cingolani et al.,  
641 2012) and Arabidopsis gene annotation downloaded from TAIR on May 1<sup>st</sup> 2018. The SNP calls in the  
642 list of usual suspects were then collected for manual inspection.

#### 643 **Water loss measurement**

644 Two middle age leaves of 3.5-week-old soil-grown plants were cut and dried abaxial side up at room  
645 temperature for 2 h, unless specified otherwise. Weight of leaves was determined before and after  
646 drying, and water loss was calculated as percentage of initial fresh weight loss.

#### 647 **Quantification of GDP-L-fucose**

648 Approximately 160 mg of frozen plant material was ground to powder and extracted first with 1 ml of  
649 80% (v/v) methanol and then with 0.5 ml of 100% methanol. During each extraction, the homogenate  
650 was vortexed at 4 °C for 2 h, then centrifuged at 21,500 g for 5 min at 4 °C. The supernatants were  
651 combined and evaporated to dryness in vacuum (MiVac Duo concentrator, GeneVac Ltd, Ipswich, UK)  
652 and reconstituted in 50 µl of 50% (v/v) methanol. The GDP-L-fucose was quantified with UPLC-  
653 6500+ QTRAP/MS system (Sciex, CA) in negative (ESI-) multiple reaction monitoring (MRM) mode.  
654 Two MRM transitions for GDP-L-fucose (C<sub>16</sub>H<sub>25</sub>O<sub>15</sub>N<sub>5</sub>P<sub>2</sub>, molecular weight 589.34 g mol<sup>-1</sup>) were  
655 used: 588.0 → 442.0 for quantitative, and 588.0 → 424.0 for qualitative purposes. The  
656 chromatographic separation was performed in Waters BEH Amide column (100 mm × 2.1 mm, ø1.7  
657 µm) at a flow rate of 0.4 ml min<sup>-1</sup>. Column compartment temperature of UPLC system (Sciex, CA) was

658 set to 35 °C while the samples were kept at 10 °C. Initial chromatographic conditions were 15% buffer  
659 A (10 mM ammonium formate, pH 9.0) and 85% buffer B (acetonitrile). The initial conditions were  
660 held for 1 min and followed by a linear gradient to 60 % (A) in 6 min, then returned to initial  
661 conditions in 1 min and left to stabilize for 2 min. Analysis has been performed with the following  
662 parameters: declustering potential of -85, entrance potential of -10, collision cell exit potential of -36  
663 and 40, respectively. The ion spray voltage was set at -4,500V, source temperature (TEM) at 425 °C,  
664 collision gas (CAD) was set to medium, curtain gas to 20, and source gas 1 (GS1) and 2 (GS2) were  
665 both set to 10. All data were acquired with Analyst 1.5.1 software (Sciex, CA) and GDP-L-fucose was  
666 quantified with MultiQuant 2.1 software (Sciex, CA) by utilizing standard calibration curve of GDP-L-  
667 fucose standard (Sigma Aldrich).

### 668 **Gas exchange analysis**

669 The gas-exchange experiments were performed as described before (Sierla et al., 2018). Briefly, plants  
670 were grown in 4:3 peat : vermiculite mix under 12 h day (23°C) / 12 h night (18°C) regime at 70%  
671 relative humidity and 100-150  $\mu\text{mol m}^{-2} \text{s}^{-1}$  light intensity. The stomatal function of 3 - 4 week-old  
672 plants was analyzed with the use of a custom-built gas-exchange device (Kollist et al., 2007). First,  
673 plants were inserted into the device and pre-incubated for about 1 h to stabilize the stomatal  
674 conductance. The experimental conditions in the chambers were as follows: ambient  $\text{CO}_2$  ( $\sim 400 \mu\text{L L}^{-1}$ )  
675  $\text{CO}_2$ , 150  $\mu\text{mol m}^{-2} \text{s}^{-1}$  light,  $\sim 70\%$  relative air humidity, 24°C. Later, stimuli triggering stomatal  
676 movements were applied and changes in stomatal conductance were monitored in time. To induce  
677 stomatal closure  $\text{O}_3$  pulse ( $450 \text{ nl l}^{-1}$  during 3 min), elevated  $\text{CO}_2$  (from  $400 \mu\text{l l}^{-1}$  to  $800 \mu\text{l l}^{-1}$ ),  
678 darkness, increase in VPD (reduction in relative air humidity (from 70% to  $\sim 30\text{-}35\%$ )) or 5  $\mu\text{M}$  ABA  
679 spray were applied. Similarly, reduction of  $\text{CO}_2$  concentration (from  $400 \mu\text{l l}^{-1}$  to  $100 \mu\text{l l}^{-1}$ ) or increase  
680 of light intensity (from 150  $\mu\text{mol m}^{-2} \text{s}^{-1}$  to 500  $\mu\text{mol m}^{-2} \text{s}^{-1}$ ) were used to trigger stomatal opening. In  
681 order to study diurnal light/darkness responses, stomatal conductance was recorded for approx. 40 h  
682 under conditions that mimicked the growth day/night regime.

## 683 **Mapping by next-generation sequencing**

684 Leaf tissue samples from the BC<sub>1</sub>F<sub>2</sub> plants exhibiting the mutant phenotype were harvested in bulk and  
685 used for preparation of nuclear DNA. The nuclear DNA-enriched sample was sheared to 400 – 600 bp  
686 fragments (Bioruptor NGS), end-repaired, A-tailed and ligated to truncated TruSeq adapters (Illumina).  
687 Full-length P5 and indexed P7 adapter sequences were introduced by PCR. The library was purified  
688 and size selected to 500-700 bp fragments as described above. Paired-end sequencing (150 – 150 bp) of  
689 the obtained library was done on a NextSeq 500 sequencer (Illumina) to an approximately 50-fold  
690 genome coverage at DNA Sequencing and Genomics Laboratory, Institute of Biotechnology,  
691 University of Helsinki. Further, data were analyzed with SHORE v0.9.0 pipeline (Ossowski et al.,  
692 2008) implementing GenomeMapper v0.4.4s read alignment tool (Schneeberger et al., 2009) according  
693 to the procedure described earlier (Sun and Schneeberger, 2015). In parallel, the same procedure was  
694 performed for line YC3.6. Next, SHOREmap v3.2 (Sun and Schneeberger, 2015) was used to identify,  
695 prioritize and annotate mutations enriched in plants displaying mutant phenotype. This final step  
696 involved subtraction of all innate YC3.6 polymorphisms.

## 697 **Nuclear DNA enrichment**

698 For nuclear DNA enrichment, plant material was ground in liquid nitrogen and 1 g of tissue powder  
699 was homogenized with 15 ml of HBM buffer (25 mM Tris-HCl pH 7.5, 440 mM sucrose, 10 mM  
700 MgCl<sub>2</sub>, 0.1% Triton X-100, 10mM  $\beta$ -mercaptoethanol, 2 mM spermine). The homogenate was filtered  
701 through Miracloth and centrifuged for 10 min at 1,075g, 4°C. Pellet was resuspended in 1 ml of NIB  
702 buffer [20 mM Tris-HCl pH 7.5, 250 mM sucrose, 5 mM MgCl<sub>2</sub>, 5 mM KCl, 0.1% (v/v) Triton X-100,  
703 10 mM  $\beta$ -mercaptoethanol] and applied to a 15/50% (v/v) Percoll gradient in NIB buffer. Samples were  
704 centrifuged for 10 min at 3000g, 4°C and pelleted nuclei were resuspended in 0.5 ml NIB buffer and  
705 centrifuged again. Pellets were mixed with 750  $\mu$ L of DNA extraction buffer [2 % (w/v)  
706 cetyltrimethylammonium bromide, 100 mM Tris-HCl pH 8.0, 20 mM EDTA pH 8.0, 1.4 M NaCl, 1 %  
707 (w/v) polyvinylpyrrolidone 40] and incubated for 30 min at 60°C. Next, samples were extracted with  
708 chloroform : isoamyl alcohol (24:1, v/v) and centrifuged for 10 min at 7,000g, 4°C. The water-soluble  
709 phase was collected, treated with RNase A (Merck), and DNA was precipitated with isopropanol  
710 at -20°C. Samples were centrifuged for 6 min at 13,000g, 4 °C, the pellet was washed twice in 70%  
711 (v/v) ethanol, air-dried, and resuspended in water. DNA concentration was measured with Qubit  
712 fluorometer (Thermo Fisher Scientific) according to manufacturer's instructions.

### 713 **Expression Analysis by qPCR**

714 For gene expression analysis of T-DNA insertion mutants, plants were grown vertically on half-  
715 strength Murashige & Skoog medium (Duchefa Biochemie) in controlled growth chambers (model  
716 MLR-350, Sanyo) under 12 h light ( $130\text{-}160\ \mu\text{mol m}^{-2}\ \text{s}^{-1}$ )/12 h dark cycle, 22°C/18°C (day/night). For  
717 every biological replicate (3 in total), approximately 10 whole two-week-old plants were pooled, frozen  
718 and ground in liquid nitrogen. Total RNA was extracted using a Genejet plant RNA isolation kit  
719 (Thermo Fisher Scientific). For analysis of *GFT1* transcript level, whole rosettes of T1 hp*GFT1* plants  
720 (minus two middle-aged leaves that were used for water loss assay) were frozen in liquid nitrogen and  
721 ground with a mortar and pestle. Total RNA was extracted as described above. Two micrograms of  
722 RNA were treated with DNaseI and reverse-transcribed using oligo-dT(20) priming with Maxima  
723 Reverse Transcriptase (RT) and Ribolock RNase inhibitor (Thermo Fisher Scientific) in a 31.5  $\mu\text{l}$   
724 volume. The reactions were diluted to the final volume of 100  $\mu\text{l}$ , 1  $\mu\text{l}$  of which was used as template  
725 for PCR with 5x HOT FIREPol EvaGreen qPCR Mix Plus (no ROX; Solis Biodyne) with gene-specific  
726 primers (Supplemental Table 5). The PCR was performed on the CFX384 Real-Time System (Bio-  
727 Rad) with the following cycle conditions: 95°C 10 min, 60 cycles with 95°C 30 s, 60°C 10 s, 72°C 30  
728 s, and ending with melting curve analysis. Col-0 cDNA dilution series was used to determine primer  
729 amplification efficiencies. Three reference genes were used for data normalization: *YELLOW-LEAF-*  
730 *SPECIFIC GENE8* (*YLS8*, *AT5G08290*), *TAP42 INTERACTING PROTEIN OF 41 KDA* (*TIP41*,  
731 *AT4G34270*), and *MONENSIN SENSITIVITY1* (*MON1*, *AT2G28390*; Czechowski et al., 2005). Data  
732 were analyzed with qBase 3.0 (Biogazelle) and the transcript levels were related to those observed in  
733 respective control lines.

### 734 **Expression analysis by RT-PCR**

735 For gene expression analysis of *fut* mutants plants were grown, and the cDNA was produced, as  
736 described above. PCR was performed with the use of FirePol polymerase (Solis Biodyne) and 1  $\mu\text{l}$  of  
737 cDNA was used as a template. *PP2AA3* (*At1g13320*) transcript was used for reference. All primers are  
738 listed in Supplementary Data Set 2. The cycling conditions were as follows 95°C 3 min, 40 cycles with  
739 95°C 30 s, 56°C 10 s, 72°C 90 s ending with 5 min final elongation at 72°C. PCR products were  
740 analyzed by agarose gel electrophoresis using ethidium bromide staining for imaging.

741 **Stomatal morphology and cuticle permeability**

742 For scanning electron microscopy, cotyledons of 3-week-old soil-grown plants (1 cotyledon per plant,  
743 4-6 plants per line per biological replicate, 3 biological replicates) were harvested and fixed for 16 h in  
744 a fixing buffer (2% paraformaldehyde, 2.5% glutaraldehyde, 0.1 M sodium cacodylate pH 7.4).  
745 Subsequently, samples were incubated for 1 h at room temperature in 0.1 M sodium cacodylate buffer  
746 pH 7.3 containing 1% (w/v) OsO<sub>4</sub> and washed twice in distilled water. Later samples were dehydrated  
747 by 3 x 10 min washing in 50% , 70%, 96% and 100% (v/v) ethanol, subjected to critical point drying  
748 (Leica EM CPD300, Leica Microsystems GmbH), mounted on the aluminum stubs and coated with 5  
749 nm layer of platinum (Quorum Q150TS, Quorum Technologies Ltd). Serial images (1,800x  
750 magnification, 10 % overlap) were taken with Quanta FEG 250 (Thermo Fisher Scientific) scanning  
751 electron microscope at the Electron Microscopy Unit, Institute of Biotechnology, University of  
752 Helsinki. Images were stitched in Fiji (Schindelin et al., 2012) implementing MIST plugin (Chalfoun et  
753 al., 2017). For each cotyledon from 1 to 2.5 mm<sup>2</sup> area was analyzed, containing 100 - 350 stomatal  
754 complexes. Morphology of every stomata within the region of interest was assessed visually and  
755 assigned into one of the four categories: normal appearance, not determined, sealed (Supplementary  
756 Figure 5F), and obstructed (Supplementary Figure 5E). The size of stomatal pores was determined by  
757 measuring the length of the stomatal pore defined by the borders of the outer cuticular ledge. Cuticle  
758 permeability assay was performed on middle-age leaves of 3-week-old soil-grown plants as described  
759 earlier (Cui et al., 2016) except 0.01% Tween 20 has been added to the staining solution. Mutants  
760 *aba2-11* (González-Guzmán et al., 2002) and *snrk2.236* (Fujii and Zhu, 2009) were used as controls  
761 with high cuticle permeability (Cui et al., 2016).

762 **Projected rosette area**

763 Rosettes were photographed with Nikon D5100 camera equipped with AF-S Micro Nikkor 40 mm  
764 1:2.8G objective (Nikon). The projected rosette area was determined by image analysis with ImageJ  
765 software (Schneider et al., 2012) equipped with Measure Rosette Area Tool  
766 ([http://dev.mri.cnrs.fr/projects/imagej-macros/wiki/Measure\\_Rosette\\_Area\\_Tool](http://dev.mri.cnrs.fr/projects/imagej-macros/wiki/Measure_Rosette_Area_Tool)).

767

768 **Atomic force microscopy**

769 For AFM experiments, seeds were stratified for 7 days at 4°C, then grown in a 3:1 compost:perlite mix.  
770 Growth conditions were as follows: light intensity  $170 \mu\text{mol m}^{-2} \text{s}^{-1}$ , 12h day (21°C) / 12 h (17°C)  
771 night, 60% humidity. Leaves from approx. 21-day-old plants were analyzed as described before (Carter  
772 et al., 2017).

773

774 **SUPPLEMENTARY DATA**

775 Supplementary Figure 1. Characterization of *T7-9* stomatal phenotypes.

776 Supplementary Figure 2. Q-PCR analysis of *mur1-9*, *ger1* and *ger2* mutants.

777 Supplementary Figure 3. Water loss-based screen of T-DNA insertion mutants of *T7-9* candidate genes.

778 Supplementary Figure 4. Cuticle permeability of *mur1* mutants.

779 Supplementary Figure 5. Scanning electron microscopy-based phenotyping of stomatal morphology in  
780 *mur1* mutants.

781 Supplementary Figure 6. Stomatal responses of *mur1* mutants to stomata-closing stimuli.

782 Supplementary Figure 7. Response of *mur1* mutants to stomata-opening stimuli.

783 Supplementary Figure 8. Analysis of hp*GFT1* T1 plants.

784 Supplementary Figure 9. The influence of soil borate concentration on water loss of *bor1-3* mutant.

785 Supplementary Figure 10. Water loss of mutants of enzymes/transporters involved in synthesis of  
786 RG-II.

787 Supplementary Figure 11. Characterization of *fut* T-DNA insertion mutants.

788 Supplementary Table 1. Genes included in candidate gene sequencing.

789 Supplementary Table 2. High-frequency single nucleotide polymorphisms identified in *T7-9* BC<sub>1</sub>F<sub>2</sub>  
790 mapping population

791 Supplementary Table 3. Genotypes of F<sub>3</sub> plants obtained from *ger1*<sup>-/-</sup> *ger2*<sup>+/-</sup> F<sub>2</sub> plants.

792 Supplementary Data Set 1. Mutations identified during candidate gene sequencing.

793 Supplementary Data Set 2. List of primers



794 **ACKNOWLEDGEMENTS**

795 We thank Julian Schroeder, Toshihisa Kotake, Malcolm A. O'Neill, Jeffrey Leung, Pedro L.  
796 Rodríguez, Jenny C. Mortimer, Julien Sechet, Richard Strasser, Hiroaki Fujii, Kirk Overmyer, Koh Iba  
797 and Paul Dupree for providing seeds of multiple mutants used in this study. We thank Joshua  
798 Heazlewood and Berit Ebert for providing *Agrobacterium tumefaciens* strain carrying the hp*GFTI*  
799 construct, T1 seeds of hp*GFTI* and corresponding EVC. Anna Huusari, Konrad Łosiński, Jelena  
800 Odintsova and Samuli Lundström are acknowledged for excellent technical help. Leena Grönholm and  
801 Valtteri Lehtonen are acknowledged for maintaining the plant growth facilities. Personnel of the DNA  
802 sequencing and genomics laboratory is acknowledged for the technical assistance with NGS. Mervi  
803 Lindman is acknowledged for assistance with electron microscopy. We gratefully acknowledge Hans  
804 Lang for an excellent technical support during the ozone fumigation experiments at the EUS. We thank  
805 Andreas Albert and the technical staff of EUS for outstanding support during the experiment. Thanks to  
806 Mikael Brosché and Kirk Overmyer for helpful comments and discussions throughout the duration of  
807 the project. This work was supported by the University of Helsinki, Academy of Finland Centre of  
808 Excellence program (2014-2019), Academy of Finland post-doctoral fellowships (Decision 294580,  
809 C.W.; 266793, T.V.), University of Helsinki 3-year research grant (C.W., M.L.G., J.P.), EDUFI  
810 fellowship (M.L.G.), The Ella and Georg Ehrnrooth Foundation (M.S.), Finnish Cultural Foundation  
811 (M.S), Dora Plus Programme (Contract No. 36.9-6.1/1372, O.Z.), Estonian Research Council  
812 (PRG433, H.K.; PUT311, PRG719, D.Y.; Mobilias Plus postdoctoral researcher grant (Contract no.  
813 MOBJD291), A.K.P), European Regional Development Fund (Center of Excellence in Molecular Cell  
814 Engineering CEMCE, H.K.). The ozone exposure experiments performed at the HMGU were  
815 supported by Transnational Access program of the European Plant Phenotyping Network (EPPN, grant  
816 no. 284443) funded by the FP7 Research Infrastructures Programme of the European Union.

817 **AUTHOR CONTRIBUTIONS**

818 J.K., conceived the project; C.W., T.V., D.Y., M.S., M.L.G., R.C., N.S., A.J.F., H.K., J.K., designed  
819 experiments, C.W., T.V., D.Y., M.S., O.Z., M.L.G., J.P., R.C., A.K.P., M.N., M.C., T.P., N.S., A.L.,  
820 L.P., P.A., A.J.F., J.S., performed experiments and analyzed the data, J.D., D.E., J.B.W., provided  
821 technological solutions for large-scale O<sub>3</sub> exposures; C.W., T.V., D.Y., M.S., A.J.F., H.K. and J.K.  
822 wrote the manuscript with comments from all co-authors.

823 **FIGURE LEGENDS**

824 **Figure 1. Synthesis and metabolism of GDP-L-fucose in *Arabidopsis thaliana*.**

825 **Figure 2. Ozone sensitivity-based forward genetic screen to identify novel regulators of stomatal**  
826 **closure.**

827 **(A)** The amount of mutant lines of known stomatal regulators identified during candidate gene  
828 sequencing.

829 **(B)** Scheme of the screening procedure.

830 **(C)** Whole-rosette gas exchange analysis of novel mutants impaired in stomatal closure. Numbers  
831 indicate the amount of mutants impaired in stomatal closure to indicated stimuli.

832 **Figure 3. Mapping of *T7-9* mutant.**

833 **(A)** Leaf fresh weight loss of *T7-9* and control lines (YC3.6, Col-0, *slac1-4* and *ghr1-3*) recorded after  
834 2h. Data bars represent means  $\pm$  SD (n = 12 plants).

835 **(B)** Positions of mutations in *mur1* mutants used in this study.

836 **(C)** Leaf fresh weight loss of *T7-9*, independent *mur1* mutants (*mur1-1*, *mur1-2*, *mur1-9*) and control  
837 lines (YC3.6, Col-0, *slac1-4* and *ghr1-3*) recorded after 2h. Data bars represent means  $\pm$  SD (n = 12  
838 plants).

839 **(A, C)** Asterisks denote statistical differences (\*\*\*) p < 0.001) to respective control lines (Col-0 or  
840 YC3.6) according to one-way ANOVA followed by Sidak's post-hoc test.

841 **(D)** GDP-L-fucose content in *T7-9*, *mur1* mutants and respective control lines measured by UPLC-MS.  
842 Data bars represent means  $\pm$  SD (n = 4-5 plants); n.d., not detected.

843 **(E)** Leaf fresh weight loss of *T7-9*, *mur1-2*, F1 *T7-9* x *mur1-2*, F1 YC3.6 x *mur1-2* and control lines  
844 recorded after 2h. Data bars represent means  $\pm$  SD (n = 9-12 plants). Asterisks denote statistical  
845 differences (\* p < 0.05; \*\* p < 0.01; \*\*\* p < 0.001) to Col-0 according to one-way ANOVA followed  
846 by Dunnett's post-hoc test.

847 **(A, C, E)** Experiments were repeated three times with similar results. Results of the representative  
848 experiments are shown.

849 **Figure 4. Characterization of *mur1* stomatal phenotypes.**

850 **(A-H)** Stomatal responses of *mur1* mutants to stomata-closing stimuli. The changes in stomatal  
851 conductance are shown in relative and absolute values calculated from the data presented in  
852 Supplementary Figure 6.

853 **(A, C, E, G)** Time course of relative stomatal conductance (normalized to the last time point before the  
854 treatment) of 3- to 4-week-old *mur1-1*, Col-0, and *ghr1-3* plants in response to **(A)** O<sub>3</sub> pulse, **(C)**  
855 elevated CO<sub>2</sub>, **(E)** ABA spray and **(G)** darkness. The indicated treatments were applied at t = 0 and  
856 whole-rosette stomatal conductance was recorded. Data points represent means ± SEM; n = 7-10 **(A)**,  
857 10-12 **(C)**, 9-11 **(E)**, 6-11 **(G)** plants analyzed in two (A, E, G) or three (C) independent experiments.

858 **(B, D, F, H)** Changes in stomatal conductance of Col-0, *mur1-1*, *mur1-2* and *ghr1-3* in response to **(B)**  
859 O<sub>3</sub> pulse, **(D)** elevated CO<sub>2</sub>, **(F)** ABA spray and **(H)** darkness. Values were calculated by subtracting  
860 the initial stomatal conductance at t = 0 **(D, F, H)** or t = -1 **(B)** from the stomatal conductance at **(B)** t  
861 = 7 min, **(D, F, H)** t = 40 min. Data bars represent means ± SEM; n = 7-10 **(B)**, 10-12 **(D)**, 9-11 **(F)**, 6-  
862 11 **(H)** plants. Asterisks denote statistical differences to Col-0 (\* p < 0.05; \*\* p < 0.01; \*\*\* p < 0.001)  
863 according to one-way ANOVA followed by Dunnett's post-hoc test.

864 **(I)** Diurnal changes in whole-rosette stomatal conductance of *mur1-1*, *mur1-2* and Col-0 plants. Data  
865 points represent means ± SEM; n = 8 plants analyzed in 3 experiments. Each experiment was started at  
866 the same time of the day and measurements were recorded for 45 h.

867

868 **Figure 5. Stomatal function in mutants affected in GDP-L-fucose metabolism.**

869 **(A)** Leaf fresh weight loss of mutants of genes encoding enzymes involved in synthesis of GDP-L-  
870 fucose, and control lines (Col-0, *mur1-1*, *mur1-2*, *slac1-4* and *ghr1-3*), recorded after 2h. Data bars  
871 represent means  $\pm$  SD (n = 13-16 plants). Asterisks denote statistical differences (\*\*\*) p < 0.001) to  
872 Col-0 according to one-way ANOVA followed by Dunnett's post-hoc test. Experiment was repeated  
873 three times with similar results. Results of the representative experiment are shown.

874 **(B)** Leaf fresh weight loss of 64 independent hp*GFTI* T1 plants, and control lines (Col-0, EVC –  
875 empty-vector control, *mur1-1*, *mur1-2*, *slac1-4* and *ghr1-3*), recorded after 2h. Data points represented  
876 values obtained for separate plants. Data bars represent means  $\pm$  SD (for control lines n = 11-12 plants).

877 **(C)** Correlation between residual *GFTI* transcript level and fresh weight loss observed in 58  
878 independent hp*GFTI* T1 plants. Each dot represents values obtained for an independent hp*GFTI* T1  
879 plant.

880 **Figure 6. Stomatal phenotypes observed in *mur1* mutants are independent from canonical guard**  
881 **cell signaling.**

882 **(A)** Leaf fresh weight loss of double mutants obtained after crossing *slac1-4*, *ghr1-3*, *aba2-11*, *ost1-3*  
883 and *ost2-2D* with *mur1-1* and *mur1-2* recorded after 1h. Data bars represent means  $\pm$  SD (n = 13-16  
884 plants). Asterisks denote statistical differences (\*\*\*) p < 0.001) to respective single mutant lines  
885 (*slac1-4*, *ghr1-3*, *aba2-11*, *ost1-3* and *ost2-2D*) according to one-way ANOVA followed by Sidak's  
886 post-hoc test. Experiment was repeated three times with similar results. Results of the representative  
887 experiment are shown.

888 **(B)** Average apparent Young's modulus ( $E_a$ ) values derived from AFM scans of subsidiary cells (SC)  
889 and guard cells (GC) of control (Col-0, YC3.6) and *mur1* plants. Bars represent means  $\pm$  SD (n = 2-3  
890 plants, 2 stomata per plant). Data analyzed with two-way repeated measures ANOVA with "genotype"  
891 and "cell type" as factors, followed by Tukey's post-hoc test. Asterisks denote statistical differences  
892 (\* p < 0.05, \*\* p < 0.01, \*\*\* p < 0.001) to respective control lines (Col-0, YC3.6) observed within a  
893 cell type.

894

895 **Figure 7. Screen for fucose-containing cell wall components affecting stomatal function.**

896 **(A)** Leaf fresh-weight loss of mutants affected in fucosylation and synthesis of xyloglucan, recorded  
897 after 2h. Values obtained for Col-0, *mur1-1*, *mur1-2*, *slac1-4* and *ghr1-3* are provided for reference.  
898 Data bars represent means  $\pm$  SD (n = 15-16 plants).

899 **(B)** The effect of borate supplementation on the leaf fresh-weight loss of *mur1* mutants and control  
900 lines (Col-0, *ghr1-3* and *slac1-4*). Bars represent means  $\pm$  SD (n = 14-16 plants). Data analyzed with  
901 two-way ANOVA with “genotype” and “borate concentration” as factors, followed by Sidak’s post-hoc  
902 test. Asterisks denote statistical significances (\*\* p < 0.01, \*\*\* p < 0.001) of treatment effect within  
903 each genotype. Experiment was repeated five times with similar results. Results of the representative  
904 experiment are shown.

905 **(C)** Leaf fresh-weight loss of mutants deficient in fucosyltransferases. Values obtained for Col-0,  
906 *mur1-1*, *mur1-2*, *slac1-4* and *ghr1-3* are provided for reference.

907 **(A, C)** Experiments were repeated at least 3 times with similar results. Results of the representative  
908 experiments are shown. Asterisks denote statistical differences (\* p < 0.05, \*\* p < 0.01, \*\*\* p < 0.001)  
909 to Col-0 according to one-way ANOVA followed by Dunnett’s post-hoc test.

910

911 **Supplementary Figure 1. Characterization of *T7-9* stomatal phenotypes.**

912 Time course of whole-plant stomatal conductance of *T7-9*, YC3.6 and *ghr1-3* (A-D) or *ost1-3* (E) in  
913 response to (A) O<sub>3</sub> pulse, (B) elevated CO<sub>2</sub>, (C) ABA spray, (D) darkness and (E) drop in relative air  
914 humidity (VPD increase from 1.01 ± 0.01 kPa to 2.04 ± 0.03 kPa (mean ± SE)). The indicated  
915 treatments were applied at t = 0 and whole-rosette stomatal conductance of 3- to 4-week-old plants was  
916 recorded. Data points represent means ± SEM; n = 8-9 (A), 8-10 (B), 9-10 (C), 6-8 (D), 3-12 (E) plants  
917 analyzed in 2 independent experiments.

918 **Supplementary Figure 2. Q-PCR analysis of *mur1-9*, *ger1* and *ger2* mutants.**

919 (A) Relative *MUR1* transcript level in Col-0 and *mur1-9* plants.

920 (B) Relative *GER1* transcript level in Col-0, *ger1-2* and *ger1-3* plants.

921 (C) Relative *GER2* transcript level in Col-0, *ger2-1* and *ger2-2* plants.

922 (A-C) Experiments performed on whole two-week-old plants grown in vitro on ½ x MS medium under  
923 12 h light (120 – 160 μmol m<sup>-2</sup> s<sup>-1</sup>)/12 h dark cycle at 22°C/18°C (day/night) temperature. Data bars  
924 represent means of three biological replicates ± SD. Asterisks indicate significant differences (\*\*\*) p <  
925 0.001) to Col-0 according to (A) Student's *t*-test, (B, C) one-way ANOVA followed by Dunnett's post-  
926 hoc test; n.d., not detected.

927 **Supplementary Figure 3. Water loss-based screen of T-DNA insertion mutants of *T7-9* candidate  
928 genes.**

929 Fresh weight loss of *T7-9*, control lines (YC3.6, Col-0, *slac1-4*, *ghr1-3*) and T-DNA insertion mutants  
930 of *T7-9* candidate genes recorded after 2h. Data bars represent means ± SD (n = 12 plants). Asterisks  
931 denote statistical differences (\*\*\*) p < 0.001) to respective control lines (Col-0 or YC3.6) according to  
932 one-way ANOVA followed by Sidak's post-hoc test. This figure is an integral part of Figure 3C, values  
933 recorded for *T7-9* and control lines are provided for reference. Experiment was performed three times  
934 with similar results.

935



936 **Supplementary Figure 4. Cuticle permeability of *mur1* mutants.**

937 Representative photos of middle-aged leaves of 3.5 weeks-old *mur1* mutants, respective control lines  
938 and cuticle-deficient mutants (*aba2-11*, *snrk2.236*) subjected to dye exclusion assay. Leaves were  
939 stained with 5  $\mu$ L drops of toluidine blue solution (0.05 % toluidine blue, 0.01% Tween 20) for 2h and  
940 rinsed with water. Dark blue staining indicates high cuticle permeability. Experiment was performed  
941 three times with similar results. Scale bar, 10 mm.

942 **Supplementary Figure 5. Scanning electron microscopy-based phenotyping of stomatal**  
943 **morphology in *mur1* mutants.**

944 (A) Stomatal density, (B) mean stomatal pore length and (C) distribution of stomatal pore length in  
945 individual plants on abaxial side of 3-week-old cotyledons of Col-0, *mur1-1* and *mur1-2*. (A, B) Data  
946 bars represent means  $\pm$  SD (n = 4-6 cotyledons, 1 cotyledon per plant). Asterisks denote statistical  
947 differences (\*\* p < 0.01, \*\*\* p < 0.001) to Col-0 according to one-way ANOVA followed Dunnett's  
948 post-hoc test.

949 (D) Frequency of abnormal stomata in Col-0, *mur1-1* and *mur1-2*. Bar represent frequencies obtained  
950 for separate plants.

951 (A-D) Experiments were performed three times with similar results.

952 (E, F) Representative images of (E) irregular/obstructed and (F) sealed stomata observed on abaxial  
953 side of 3-week-old cotyledons of *mur1* mutants.

954 **Supplementary Figure 6. Stomatal responses of *mur1* mutants to stomata-closing stimuli.**

955 (A-E) Whole-rosette stomatal conductance of 3- to 4-week-old *mur1-1*, *mur1-2*, Col-0 and *ghr1-3*  
956 (A-D) or *ost1-3* (E) plants in response to (A) O<sub>3</sub> pulse, (B) elevated CO<sub>2</sub>, (C) ABA spray, (D) darkness,  
957 (E) drop in relative humidity (VPD increase from 1.01  $\pm$  0.01 kPa to 2.04  $\pm$  0.03 kPa (mean  $\pm$  SE)).  
958 The indicated treatments were applied at t = 0. Data points represent means  $\pm$  SEM; n = 7-10 (A), 10-  
959 12 (B), 9-11 (C), 6-11 (D), 3-12 (E) plants analyzed in 2 (A, C, D, E) or 3 (B) independent  
960 experiments.

961 (F) Changes in low humidity-induced stomatal conductance in Col-0, *mur1-1*, *mur1-2* and *ost1-3*.  
962 Values were calculated by subtracting the stomatal conductance at t = 0 from the stomatal conductance  
963 at t = 16 min based on data presented in (E). Data bars represent means  $\pm$  SEM; n = 3-12 plants.

964 Asterisks denote statistical differences to Col-0 (\*\*  $p < 0.01$ ) according to one-way ANOVA followed  
965 by Dunnett's post-hoc test.

966 **Supplementary Figure 7. Response of *mur1* mutants to stomata-opening stimuli.**

967 **(A, C)** Time course of stomatal conductance of *mur1-1*, Col-0 and *ht1-2* plants in response to **(A)** low  
968 CO<sub>2</sub> concentration, **(C)** increase in light intensity. The indicated treatments were applied at  $t = 0$  and  
969 whole-rosette stomatal conductance of 3- to 4-week-old plants was recorded. Data points represent  
970 means  $\pm$  SEM;  $n = 8-10$  plants analyzed in 2 independent experiments.

971 **(B)** Change in stomatal conductance 104 min after decrease in CO<sub>2</sub> concentration, calculated based on  
972 the data presented in **(A)**.

973 **(D)** Change in stomatal conductance 56 min after increase of light intensity, calculated based on the  
974 data presented in **(C)**.

975 **(B, D)** Values were calculated by subtracting the initial stomatal conductance recorded at  $t = 0$  from the  
976 stomatal conductance obtained at **(B)**  $t = 104$  min, **(D)**  $t = 56$  min. Data bars represent means  $\pm$  SEM;  
977  $n = 8-10$  plants. Asterisks denote statistical differences to Col-0 (\*\*\*)  $p < 0.001$ ) according to one-way  
978 ANOVA followed by Dunnett's post-hoc test.

979 **Supplementary Figure 8. Analysis of hpGFTI T1 plants.**

980 **(A)** Rosette morphology of selected hpGFTI T1 plants, empty vector control (EVC), Col-0 and *mur1*  
981 mutants. Scale bar = 20 mm.

982 **(B)** Variability in *GFTI* transcript level observed in 58 independent hpGFTI T1 plants. Data points  
983 represent values obtained for separate plants. Data bars represent means  $\pm$  SD; Col-0  $n = 3$  plants, EVC  
984  $n = 10$  plants.

985 **(C)** The relationship between the fresh weight loss in 2h and projected rosette area observed in 64  
986 independent hpGFTI T1 plants. Each data point represents values obtained for a single hpGFTI T1  
987 plant.

988 **Supplementary Figure 9. The influence of soil borate concentration on leaf fresh-weight loss**  
989 **of *bor1-3* mutant.**

990 Data bars represent means  $\pm$  SD (n = 10-16 plants per genotype per condition). Experiment was  
991 performed three times with similar results.

992

993 **Supplementary Figure 10. Water loss of mutants of enzymes/transporters involved in synthesis**  
994 **of RG-II.**

995 Data bars represent means  $\pm$  SD (n = 13-16 plants). Asterisks denote statistical differences (\*\*\*) p <  
996 0.001) to respective control lines (Col-0 or EVC-empty vector control) according to one-way ANOVA  
997 followed by Sidak's post-hoc test. Experiment was performed three times with similar results.

998 **Supplementary Figure 11. Characterization of *fut* T-DNA insertion mutants.**

999 **(A-D)** Results of RT-PCR obtained for indicated *fut* mutants with primers specific for **(A)** *FUT2*, **(B)**  
1000 *FUT3*, **(C)** *FUT8* and **(D)** *FUT10*. *PP2AA3* was used as a reference gene and within each panel the  
1001 same cDNA sample was used for amplification with all primer sets. The experiment was performed  
1002 with three biological replicates and with similar results. Representative results are shown.

## Supplementary Figure 1

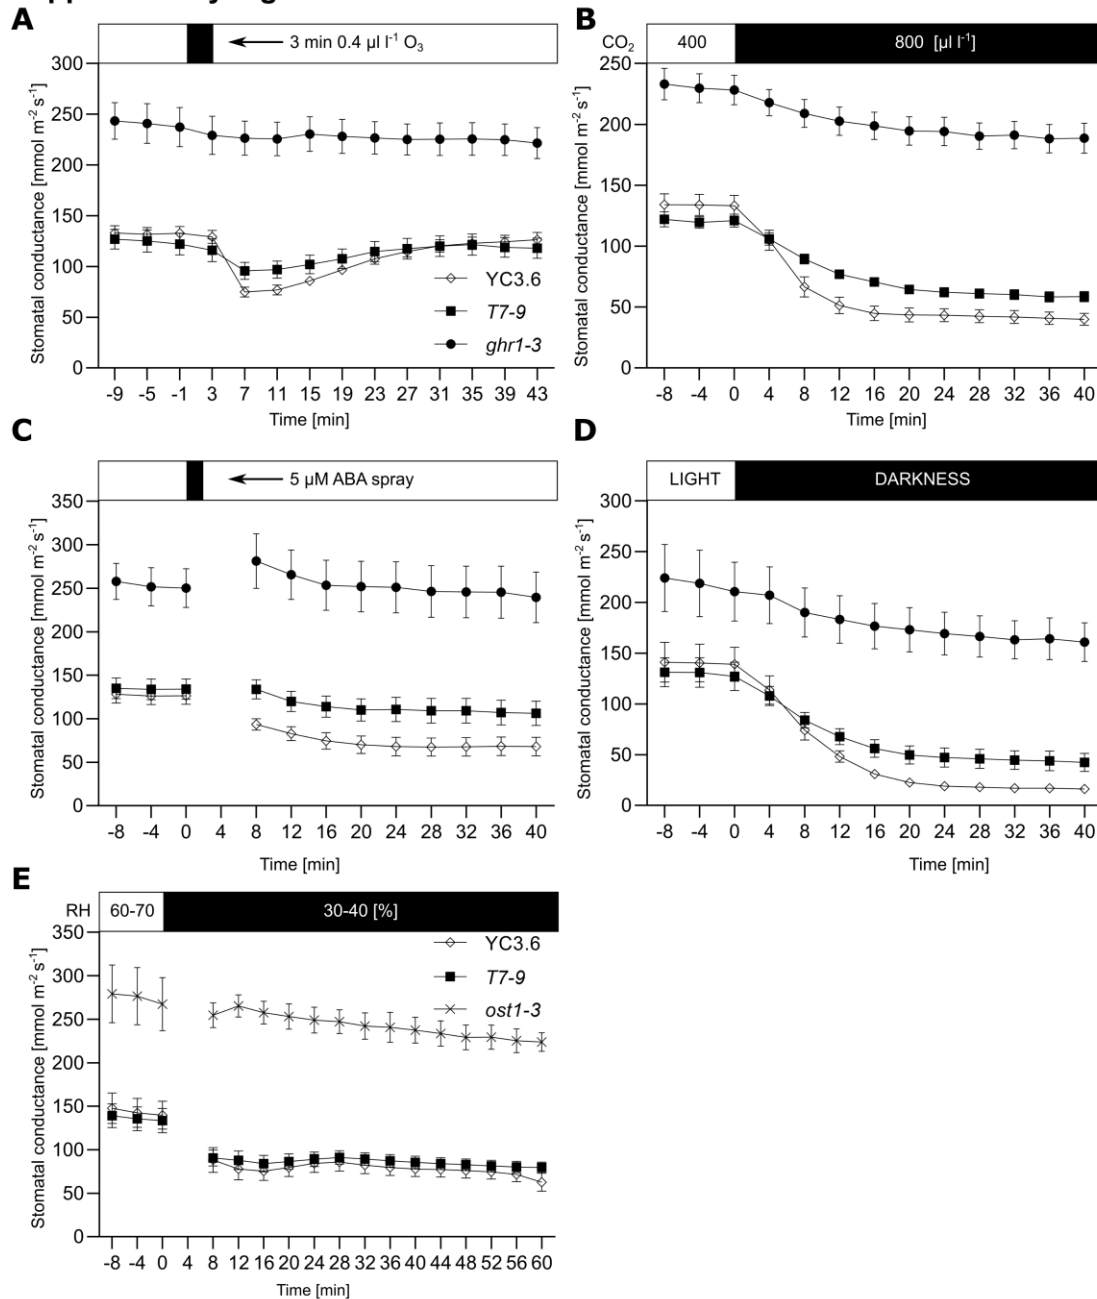

### Supplementary Figure 1. Characterization of *T7-9* stomatal phenotypes.

Time course of whole-plant stomatal conductance of *T7-9*, YC3.6 and *ghr1-3* (A-D) or *ost1-3* (E) in response to (A)  $\text{O}_3$  pulse, (B) elevated  $\text{CO}_2$ , (C) ABA spray, (D) darkness and (E) drop in relative air humidity (VPD increase from  $1.01 \pm 0.01$  kPa to  $2.04 \pm 0.03$  kPa (mean  $\pm$  SE)). The indicated treatments were applied at  $t = 0$  and whole-rosette stomatal conductance of 3- to 4-week-old plants was recorded. Data points represent means  $\pm$  SEM;  $n = 8-9$  (A), 8-10 (B), 9-10 (C), 6-8 (D), 3-12 (E) plants analyzed in 2 independent experiments.

## Supplementary Figure 2

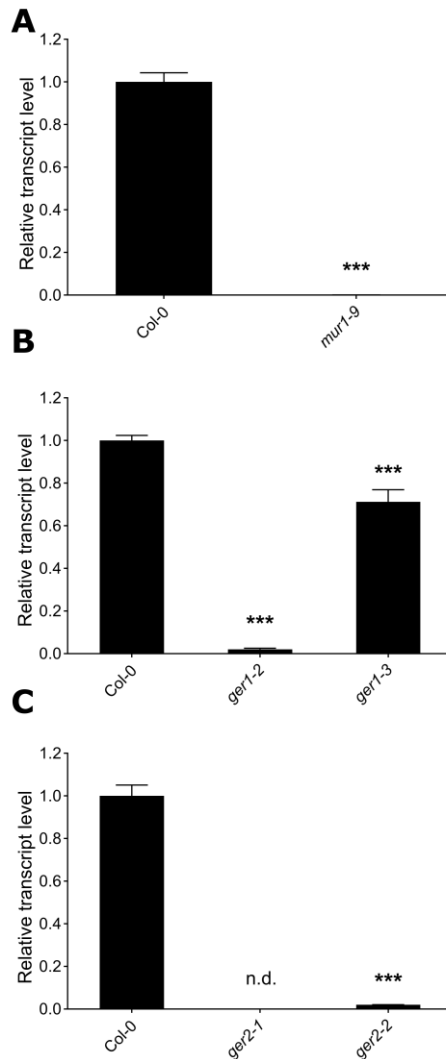

### Supplementary Figure 2. Q-PCR analysis of *mur1-9*, *ger1* and *ger2* mutants.

(A) Relative *MUR1* transcript level in Col-0 and *mur1-9* plants.

(B) Relative *GER1* transcript level in Col-0, *ger1-2* and *ger1-3* plants.

(C) Relative *GER2* transcript level in Col-0, *ger2-1* and *ger2-2* plants.

(A-C) Experiments performed on whole two-week-old plants grown in vitro on  $\frac{1}{2}$  x MS medium under 12 h light ( $120 - 160 \mu\text{mol m}^{-2} \text{s}^{-1}$ )/12 h dark cycle at 22°C/18°C (day/night) temperature. Data bars represent means of three biological replicates  $\pm$  SD. Asterisks indicate significant differences (\*\*\*)  $p < 0.001$ ) to Col-0 according to (A) Student's *t*-test, (B, C) one-way ANOVA followed by Dunnett's post-hoc test; n.d., not detected.



### Supplementary Figure 3

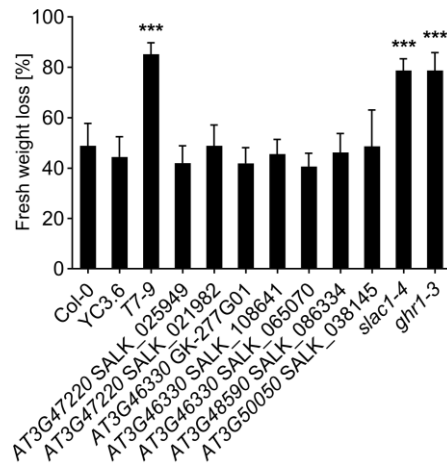

### Supplementary Figure 3. Water loss-based screen of T-DNA insertion mutants of *T7-9* candidate genes.

Fresh weight loss of *T7-9*, control lines (YC3.6, Col-0, *slac1-4*, *ghr1-3*) and T-DNA insertion mutants of *T7-9* candidate genes recorded after 2h. Data bars represent means  $\pm$  SD (n = 12 plants). Asterisks denote statistical differences (\*\*\*)  $p < 0.001$  to respective control lines (Col-0 or YC3.6) according to one-way ANOVA followed by Sidak's post-hoc test. This figure is an integral part of Figure 3C, values recorded for *T7-9* and control lines are provided for reference. Experiment was performed three times with similar results.

### Supplementary Figure 4

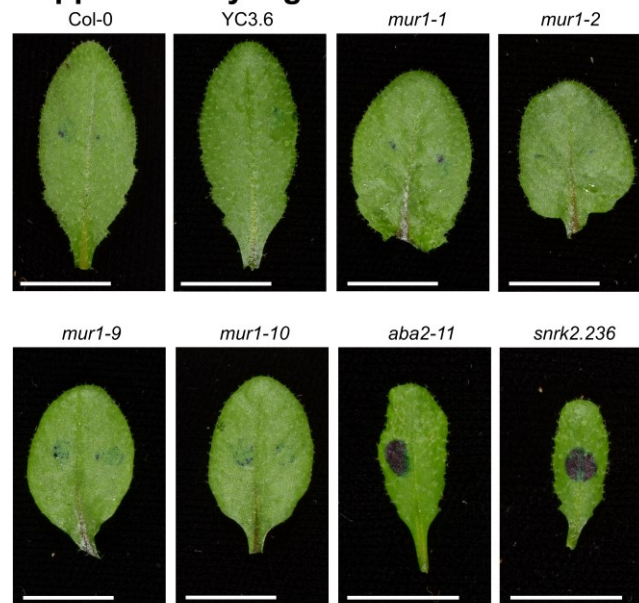

#### Supplementary Figure 4. Cuticle permeability of *mur1* mutants.

Representative photos of middle-aged leaves of 3.5 weeks-old *mur1* mutants, respective control lines and cuticle-deficient mutants (*aba2-11*, *snrk2.236*) subjected to dye exclusion assay. Leaves were stained with 5  $\mu$ L drops of toluidine blue solution (0.05 % toluidine blue, 0.01% Tween 20) for 2h and rinsed with water. Dark blue staining indicates high cuticle permeability. Experiment was performed three times with similar results. Scale bar, 10 mm.

## Supplementary Figure 5

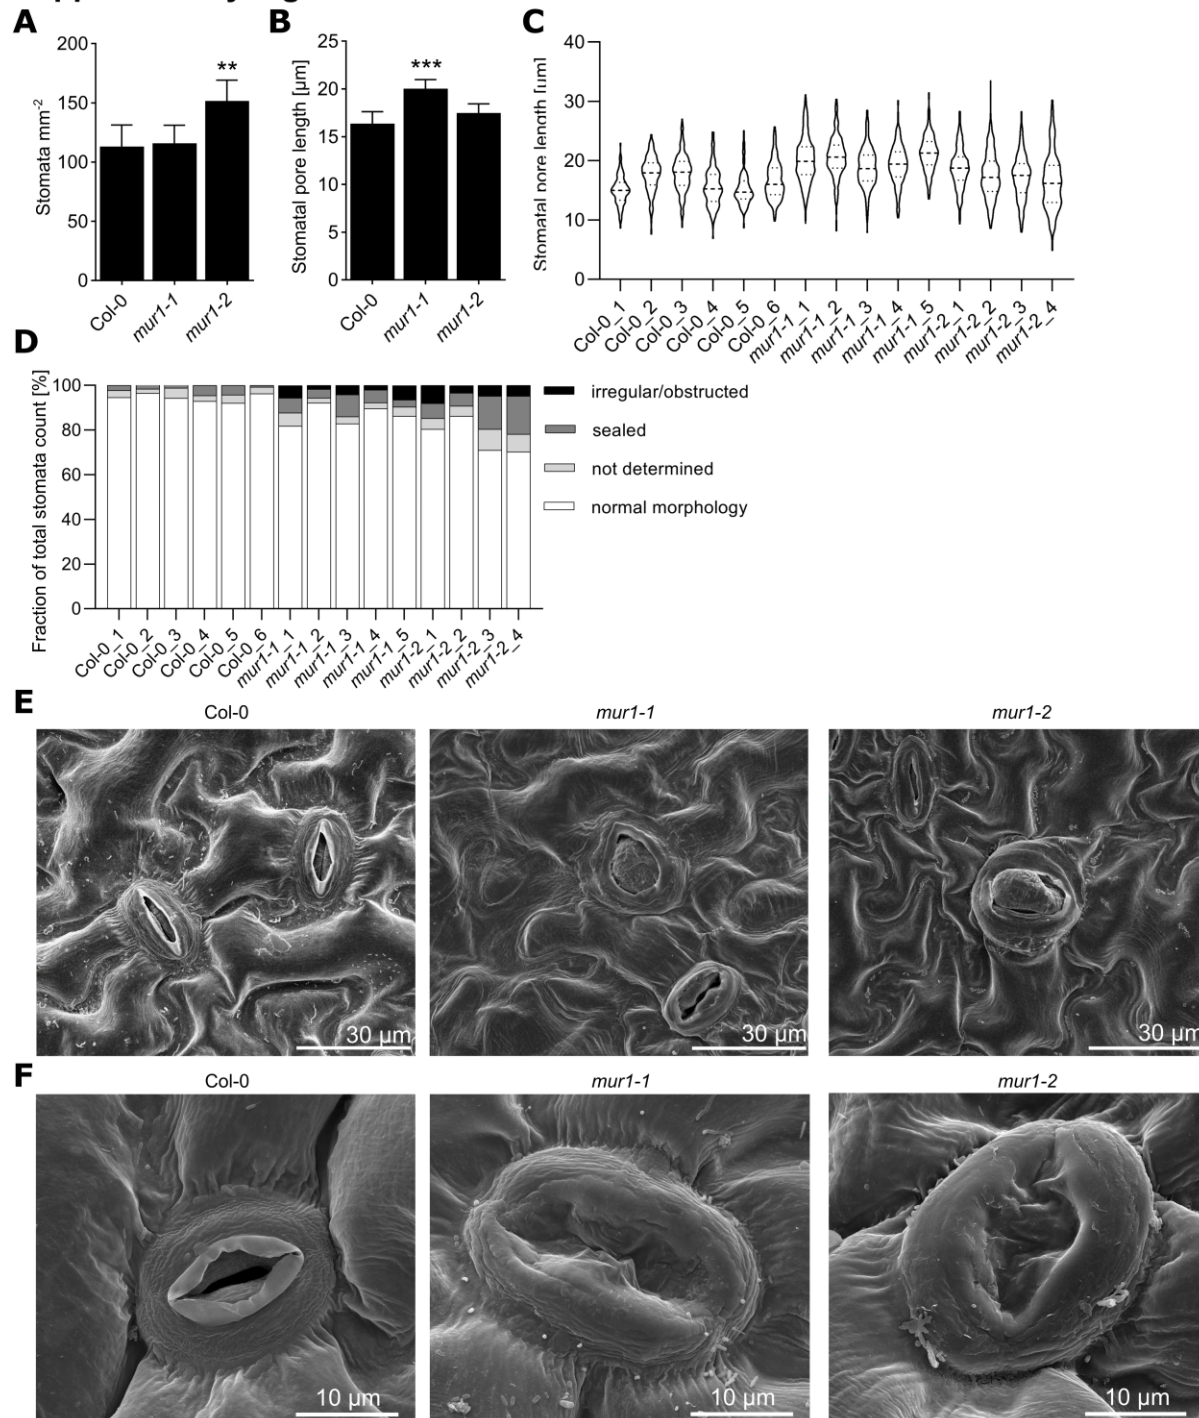

**Supplementary Figure 5. Scanning electron microscopy-based phenotyping of stomatal morphology in *mur1* mutants.**

(A) Stomatal density, (B) mean stomatal pore length and (C) distribution of stomatal pore length in individual plants on abaxial side of 3-week-old cotyledons of Col-0, *mur1-1* and *mur1-2*. (A, B) Data

bars represent means  $\pm$  SD (n = 4-6 cotyledons, 1 cotyledon per plant). Asterisks denote statistical differences (\*\* p < 0.01, \*\*\* p < 0.001) to Col-0 according to one-way ANOVA followed Dunnett's post-hoc test.

**(D)** Frequency of abnormal stomata in Col-0, *mur1-1* and *mur1-2*. Bar represent frequencies obtained for separate plants.

**(A-D)** Experiments were performed three times with similar results.

**(E, F)** Representative images of **(E)** irregular/obstructed and **(F)** sealed stomata observed on abaxial side of 3-week-old cotyledons of *mur1* mutants.

## Supplementary Figure 6

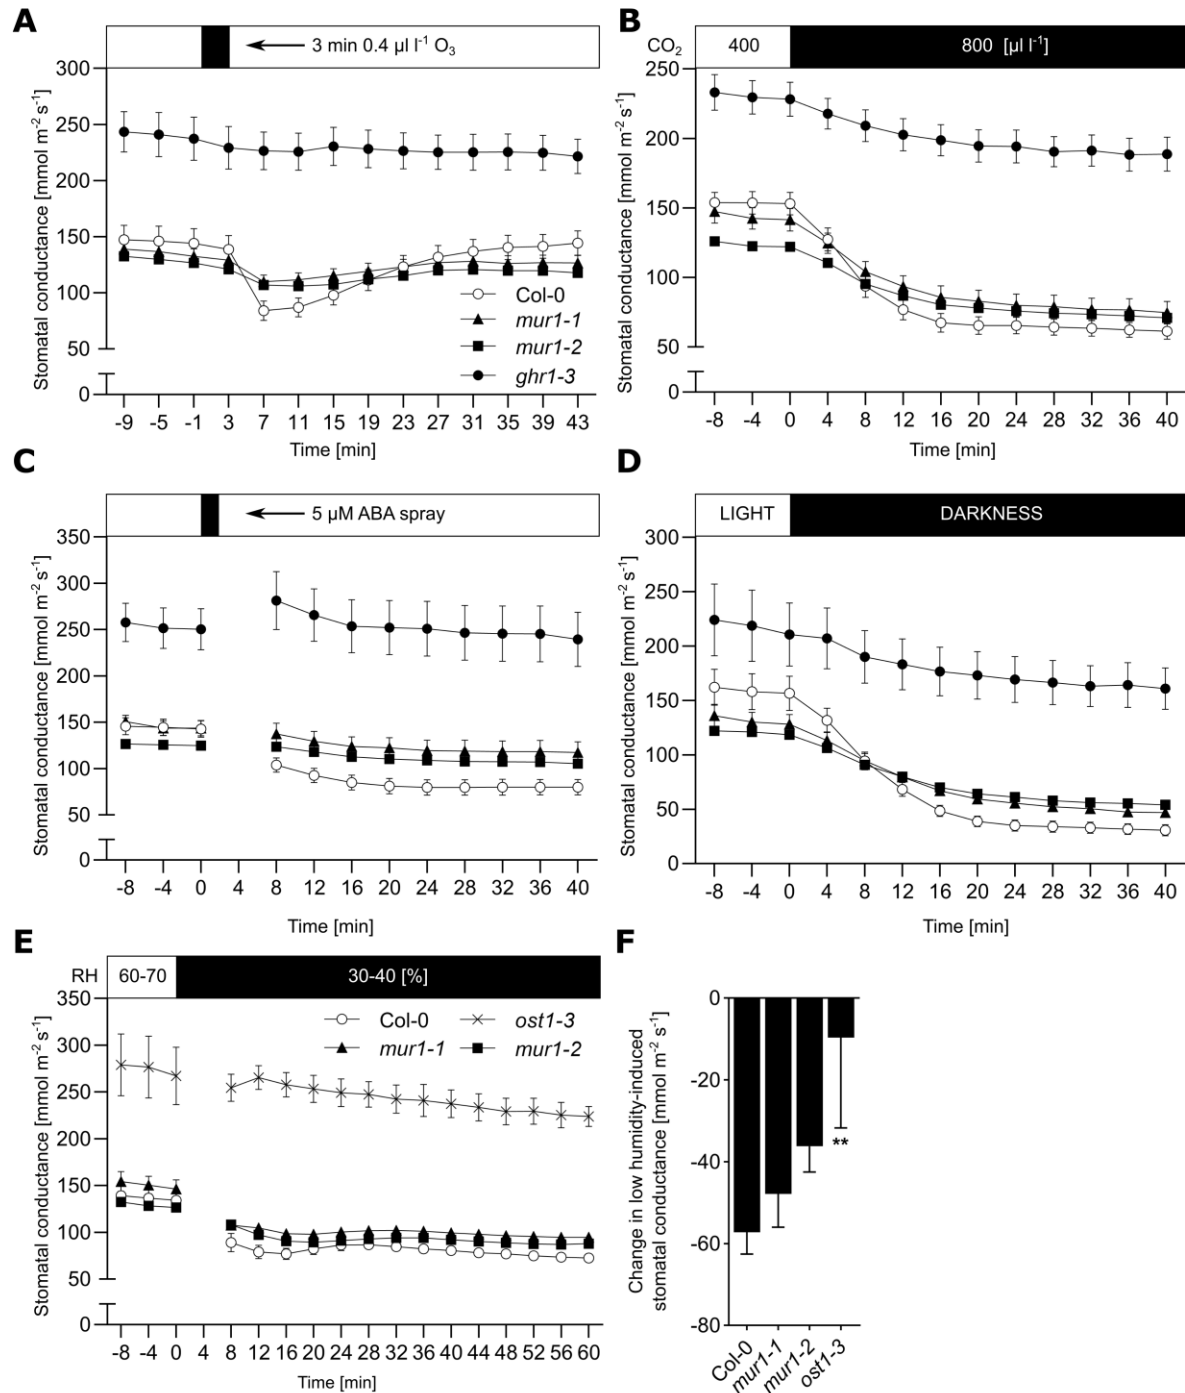

### Supplementary Figure 6. Stomatal responses of *mur1* mutants to stomata-closing stimuli.

(A-E) Whole-rosette stomatal conductance of 3- to 4-week-old *mur1-1*, *mur1-2*, Col-0 and *ghr1-3* (A-D) or *ost1-3* (E) plants in response to (A)  $\text{O}_3$  pulse, (B) elevated  $\text{CO}_2$ , (C) ABA spray, (D) darkness, (E) drop in relative humidity (VPD increase from  $1.01 \pm 0.01$  kPa to  $2.04 \pm 0.03$  kPa (mean  $\pm$  SE)). The

indicated treatments were applied at  $t = 0$ . Data points represent means  $\pm$  SEM;  $n = 7-10$  **(A)**,  $10-12$  **(B)**,  $9-11$  **(C)**,  $6-11$  **(D)**,  $3-12$  **(E)** plants analyzed in 2 **(A, C, D, E)** or 3 **(B)** independent experiments.

**(F)** Changes in low humidity-induced stomatal conductance in Col-0, *mur1-1*, *mur1-2* and *ost1-3*. Values were calculated by subtracting the stomatal conductance at  $t = 0$  from the stomatal conductance at  $t = 16$  min based on data presented in **(E)**. Data bars represent means  $\pm$  SEM;  $n = 3-12$  plants. Asterisks denote statistical differences to Col-0 (\*\*  $p < 0.01$ ) according to one-way ANOVA followed by Dunnett's post-hoc test.



## Supplementary Figure 7

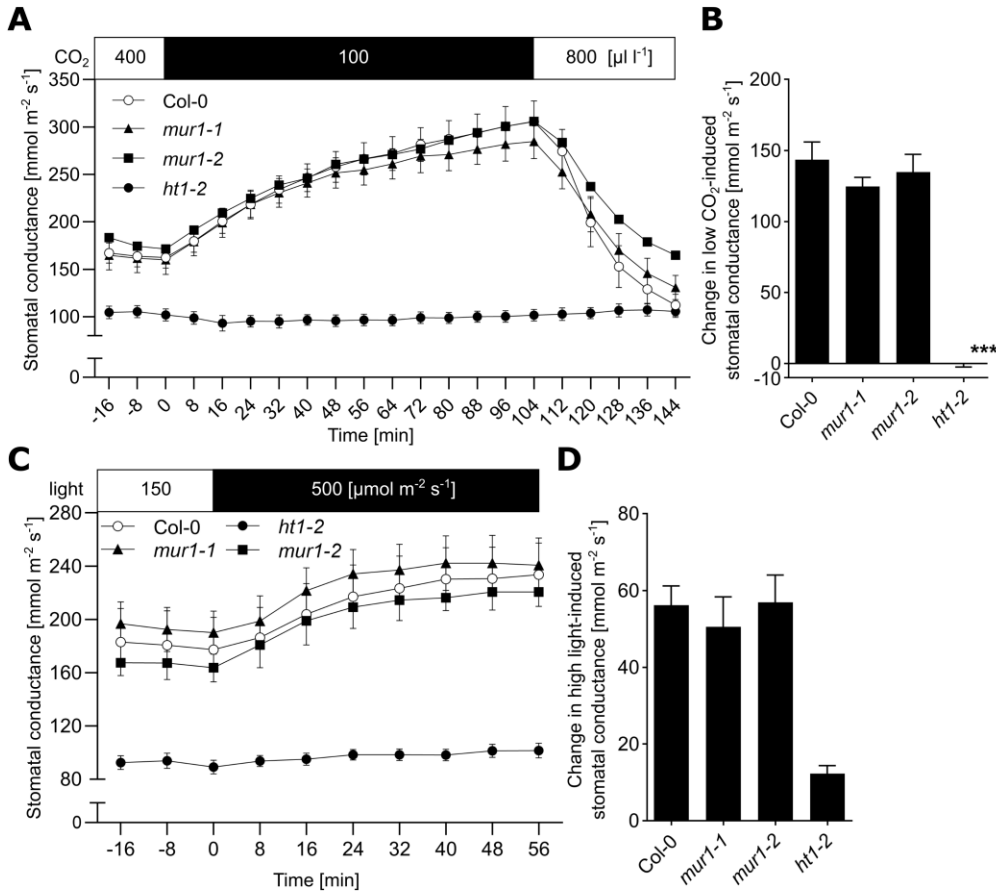

### Supplementary Figure 7. Response of *mur1* mutants to stomata-opening stimuli.

(A, C) Time course of stomatal conductance of *mur1-1*, Col-0 and *ht1-2* plants in response to (A) low CO<sub>2</sub> concentration, (C) increase in light intensity. The indicated treatments were applied at t = 0 and whole-rosette stomatal conductance of 3- to 4-week-old plants was recorded. Data points represent means  $\pm$  SEM; n = 8-10 plants analyzed in 2 independent experiments.

(B) Change in stomatal conductance 104 min after decrease in CO<sub>2</sub> concentration, calculated based on the data presented in (A).

(D) Change in stomatal conductance 56 min after increase of light intensity, calculated based on the data presented in (C).

(B, D) Values were calculated by subtracting the initial stomatal conductance recorded at t = 0 from the stomatal conductance obtained at (B) t = 104 min, (D) t = 56 min. Data bars represent means  $\pm$  SEM; n = 8-10 plants. Asterisks denote statistical differences to Col-0 (\*\*\*) according to one-way ANOVA followed by Dunnett's post-hoc test.

## Supplementary Figure 8

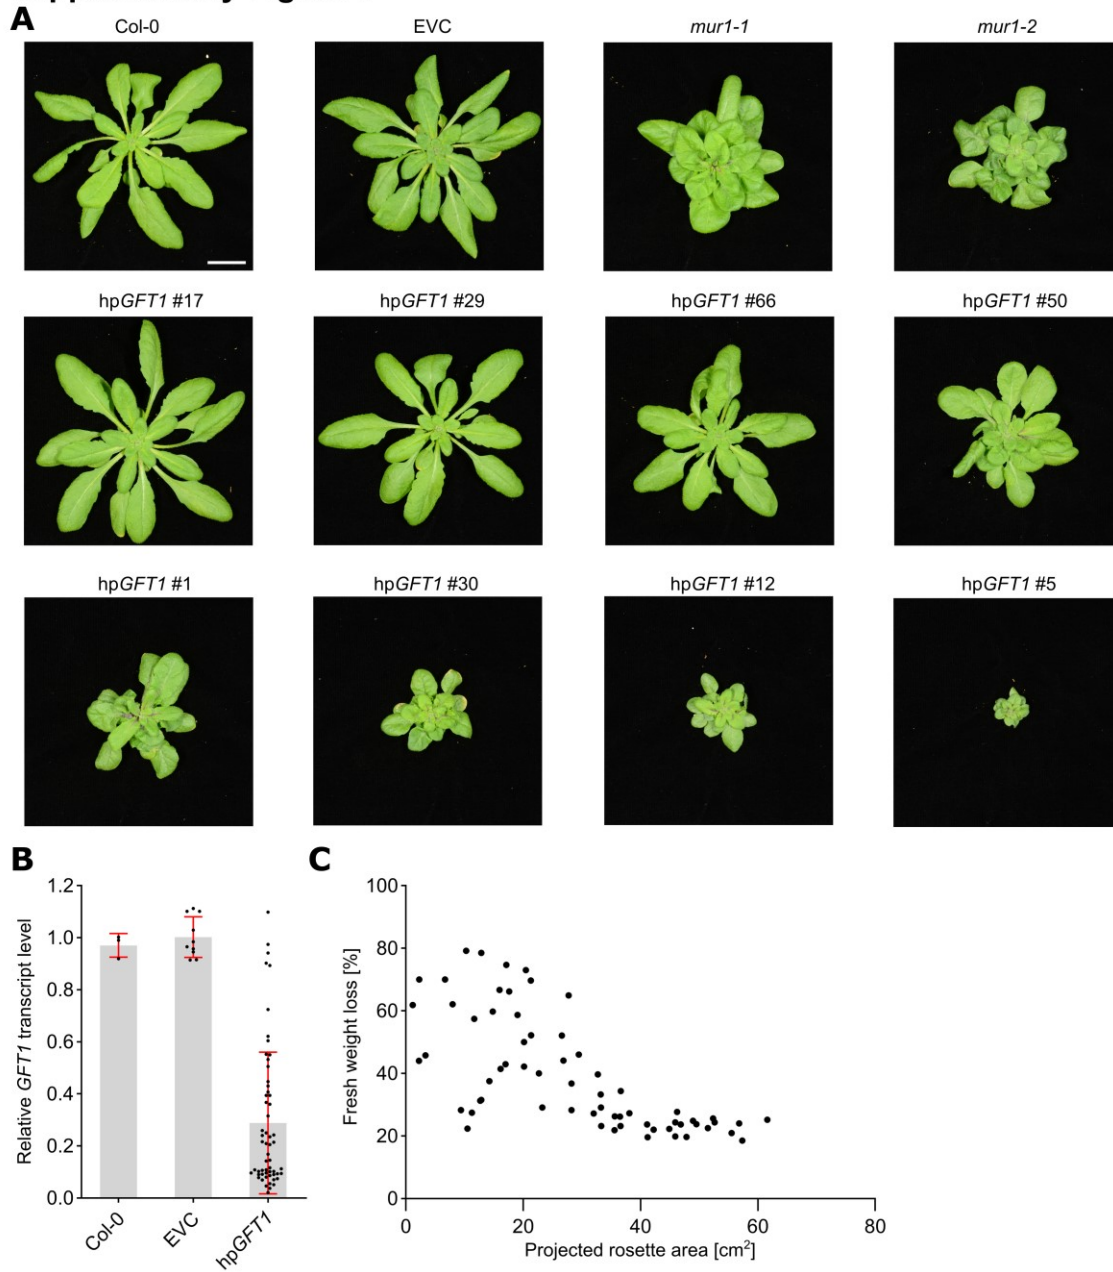

### Supplementary Figure 8. Analysis of *hpGFT1* T1 plants.

(A) Rosette morphology of selected *hpGFT1* T1 plants, empty vector control (EVC), Col-0 and *mur1* mutants. Scale bar = 20 mm.

**(B)** Variability in *GFTI* transcript level observed in 58 independent *hpGFTI* T1 plants. Data points represent values obtained for separate plants. Data bars represent means  $\pm$  SD; Col-0 n = 3 plants, EVC n = 10 plants.

**(C)** The relationship between the fresh weight loss in 2h and projected rosette area observed in 64 independent *hpGFTI* T1 plants. Each data point represents values obtained for a single *hpGFTI* T1 plant.

## Supplementary Figure 9

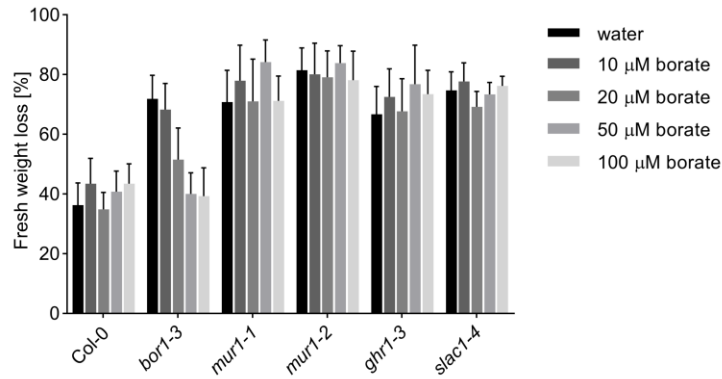

**Supplementary Figure 9. The influence of soil borate concentration on leaf fresh-weight loss of *bor1-3* mutant.**

Data bars represent means  $\pm$  SD (n = 10-16 plants per genotype per condition). Experiment was performed three times with similar results.

### Supplementary Figure 10

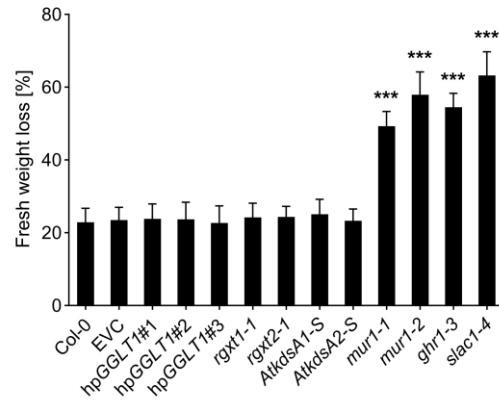

### Supplementary Figure 10. Water loss of mutants of enzymes/transporters involved in synthesis of RG-II.

Data bars represent means  $\pm$  SD (n = 13-16 plants). Asterisks denote statistical differences (\*\*\*)  $p < 0.001$ ) to respective control lines (Col-0 or EVC-empty vector control) according to one-way ANOVA followed by Sidak's post-hoc test. Experiment was performed three times with similar results.

## Supplementary Figure 11

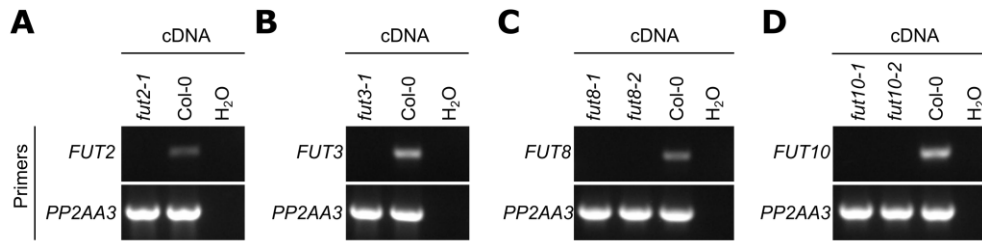

### Supplementary Figure 11. Characterization of *fut* T-DNA insertion mutants.

(A-D) Results of RT-PCR obtained for indicated *fut* mutants with primers specific for (A) *FUT2*, (B) *FUT3*, (C) *FUT8* and (D) *FUT10*. *PP2AA3* was used as a reference gene and within each panel the same cDNA sample was used for amplification with all primer sets. The experiment was performed with three biological replicates and with similar results. Representative results are shown.



**Supplementary Table 1. Genes included in candidate gene sequencing.**

| Functional group               | Protein name                            | Abbreviation | AGI code  | References                                                                         |
|--------------------------------|-----------------------------------------|--------------|-----------|------------------------------------------------------------------------------------|
| Ion channels                   | SLOW ANION CHANNEL-ASSOCIATED1          | SLAC1        | AT1G12480 | (Vahisalu et al., 2008)<br>(Negi et al., 2008)                                     |
|                                | QUICK-ACTIVATING ANION CHANNEL1         | QUAC1        | AT4G17970 | (Sasaki et al., 2010)<br>(Meyer et al., 2010)                                      |
| LRR receptor-like pseudokinase | GUARD CELL HYDROGEN PEROXIDE-RESISTANT1 | GHR1         | AT4G20940 | (Hua et al., 2012)<br>(Sierla et al., 2018)                                        |
| ABA synthesis                  | ABA DEFICIENT1                          | ABA1         | AT5G67030 | (Koornneef et al., 1982)<br>(Marin et al., 1996)                                   |
|                                | ABA DEFICIENT2                          | ABA2         | AT1G52340 | (Léon-Kloosterziel et al., 1996)<br>(González-Guzmán et al., 2002)                 |
|                                | ABA DEFICIENT3                          | ABA3         | AT1G16540 | (Léon-Kloosterziel et al., 1996)<br>(Xiong et al., 2001)<br>(Bittner et al., 2001) |
|                                | ABA DEFICIENT4                          | ABA4         | AT1G67080 | (North et al., 2007)                                                               |
|                                | ABSCISIC ALDEHYDE OXIDASE3              | AAO3         | AT2G27150 | (Seo et al., 2000)                                                                 |

|             |                                       |       |           |                                                                                       |
|-------------|---------------------------------------|-------|-----------|---------------------------------------------------------------------------------------|
|             | NINE-CIS-EPOXYCAROTENOID DIOXYGENASE3 | NCED3 | AT3G14440 | (Iuchi et al., 2001)                                                                  |
| Proton pump | H <sup>+</sup> -ATPASE 1              | AHA1  | AT2G18960 | (Merlot et al., 2007)                                                                 |
| Kinases     | OPEN STOMATA1                         | OST1  | AT4G33950 | (Mustilli et al., 2002)<br>(Yoshida et al., 2002)                                     |
|             | HIGH LEAF TEMPERATURE1                | HT1   | AT1G62400 | (Hashimoto et al., 2006)<br>(Hashimoto-Sugimoto et al., 2016)<br>(Hörak et al., 2016) |
|             | MITOGEN-ACTIVATED PROTEIN KINASE12    | MPK12 | AT2G46070 | (Des Marais et al., 2014)<br>(Jakobson et al., 2016)<br>(Hörak et al., 2016)          |
| PP2Cs       | ABA INSENSITIVE1                      | ABI1  | AT4G26080 | (Meyer et al., 1994)<br>(Leung et al., 1994)                                          |
|             | ABA INSENSITIVE2                      | ABI2  | AT5G57050 | (Leung et al., 1997)                                                                  |
|             | HYPERSENSITIVE TO ABA1                | HAB1  | AT1G72770 | (Saez et al., 2004)                                                                   |
|             | HIGHLY ABA-INDUCED PP2C GENE1         | HAI1  | AT5G59220 | (Antoni et al., 2012)                                                                 |
|             | HIGHLY ABA-INDUCED PP2C GENE2         | HAI2  | AT1G07430 | (Lim et al., 2012)                                                                    |

|                       |                          |        |           |                                                                      |
|-----------------------|--------------------------|--------|-----------|----------------------------------------------------------------------|
|                       | PROTEIN PHOSPHATASE 2CA  | PP2CA  | AT3G11410 | (Kuhn et al., 2006)                                                  |
| ABA transport         | ATP-BINDING CASSETTE G22 | ABCG22 | AT5G06530 | (Kuromori et al., 2011)                                              |
| Strigolactone-related | MORE AXILLARY BRANCHES2  | MAX2   | AT2G42620 | (Piisilä et al., 2015)<br>(Bu et al., 2014)<br>(Ha et al., 2014)     |
|                       | DWARF14                  | D14    | AT3G03990 | (Li et al., 2017)<br>(Zhang et al., 2018)<br>(Kalliola et al., 2020) |

## References

- Antoni R, Gonzalez-Guzman M, Rodriguez L, Rodrigues A, Pizzio GA, Rodriguez PL** (2012) Selective inhibition of Clade A phosphatases type 2C by PYR/PYL/RCAR abscisic acid receptors. *Plant Physiol* **158**: 970–980
- Bittner F, Oreb M, Mendel RR** (2001) ABA3 is a molybdenum cofactor sulfurase required for activation of aldehyde oxidase and xanthine dehydrogenase in *Arabidopsis thaliana*. *J Biol Chem* **276**: 40381–4
- Bu Q, Lv T, Shen H, Luong P, Wang J, Wang Z, Huang Z, Xiao L, Engineer C, Kim TH, et al** (2014) Regulation of drought tolerance by the F-box protein MAX2 in *Arabidopsis*. *Plant Physiol* **164**: 424–439
- González-Guzmán M, Apostolova N, Bellés JM, Barrero JM, Piqueras P, Ponce MR, Micol JL, Serrano R, Rodríguez PL** (2002) The short-chain alcohol dehydrogenase ABA2 catalyzes the conversion of xanthoxin to abscisic aldehyde. *Plant Cell* **14**: 1833–46
- Ha C V, Leyva-González MA, Osakabe Y, Tran UT, Nishiyama R, Watanabe Y, Tanaka M, Seki M, Yamaguchi S, Dong N Van, et al** (2014) Positive regulatory role of strigolactone in plant responses to drought and salt stress. *PNAS* **111**: 851–6
- Hashimoto-Sugimoto M, Negi J, Monda K, Higaki T, Isogai Y, Nakano T, Hasezawa S, Iba K** (2016) Dominant and recessive mutations in

- the Raf-like kinase *HT1* gene completely disrupt stomatal responses to CO<sub>2</sub> in *Arabidopsis*. *J Exp Bot* **67**: 3251–3261
- Hashimoto M, Negi J, Young J, Israelsson M, Schroeder JI, Iba K** (2006) *Arabidopsis* HT1 kinase controls stomatal movements in response to CO<sub>2</sub>. *Nat Cell Biol* **8**: 391–397
- Hõrak H, Sierla M, Tõldsepp K, Wang C, Wang Y-S, Nuhkat M, Valk E, Pechter P, Merilo E, Salojärvi J, et al** (2016) A dominant mutation in the HT1 kinase uncovers roles of MAP kinases and GHR1 in CO<sub>2</sub>-induced stomatal closure. *Plant Cell* **28**: 2493–2509
- Hua D, Wang C, He J, Liao H, Duan Y, Zhu Z, Guo Y, Chen Z, Gong Z** (2012) A plasma membrane receptor kinase, GHR1, mediates abscisic acid- and hydrogen peroxide-regulated stomatal movement in *Arabidopsis*. *Plant Cell* **24**: 2546–61
- Iuchi S, Kobayashi M, Taji T, Naramoto M, Seki M, Kato T, Tabata S, Kakubari Y, Yamaguchi-Shinozaki K, Shinozaki K** (2001) Regulation of drought tolerance by gene manipulation of 9-cis-epoxycarotenoid dioxygenase, a key enzyme in abscisic acid biosynthesis in *Arabidopsis*. *Plant J* **27**: 325–333
- Jakobson L, Vaahtera L, Tõldsepp K, Nuhkat M, Wang C, Wang YS, Hõrak H, Valk E, Pechter P, Sindarovska Y, et al** (2016) Natural variation in *Arabidopsis* Cvi-0 accession reveals an important role of MPK12 in guard cell CO<sub>2</sub> signaling. *PLoS Biol* **14**: e2000322
- Kalliola M, Jakobson L, Davidsson P, Pennanen V, Waszczak C, Yarmolinsky D, Zamora O, Palva ET, Kariola T, Kollist H, et al** (2020) Differential role of MAX2 and strigolactones in pathogen, ozone, and stomatal responses. *Plant Direct* **4**: e00206
- Koornneef M, Jorna ML, Brinkhorst-van der Swan DLC, Karssen CM** (1982) The isolation of abscisic acid (ABA) deficient mutants by selection of induced revertants in non-germinating gibberellin sensitive lines of *Arabidopsis thaliana* (L.) heynh. *Theor Appl Genet* **61**: 385–393
- Kuhn JM, Boisson-Dernier A, Dizon MB, Maktabi MH, Schroeder JI** (2006) The protein phosphatase *AtPP2CA* negatively regulates abscisic acid signal transduction in *Arabidopsis*, and effects of *abh1* on *AtPP2CA* mRNA. *Plant Physiol* **140**: 127–139
- Kuromori T, Sugimoto E, Shinozaki K** (2011) *Arabidopsis* mutants of *AtABCG22*, an ABC transporter gene, increase water transpiration and drought susceptibility. *Plant J* **67**: 885–894
- Léon-Kloosterziel KM, Gil MA, Ruijs GJ, Jacobsen SE, Olszewski NE, Schwartz SH, Zeevaart JAD, Koornneef M** (1996) Isolation and characterization of abscisic acid-deficient *Arabidopsis* mutants at two new loci. *Plant J* **10**: 655–661
- Leung J, Bouvier-Durand M, Morris P, Guerrier D, Chedford F, Giraudat J** (1994) *Arabidopsis* ABA response gene *ABI1*: features of a calcium-modulated protein phosphatase. *Science* **264**: 1448–1452

- Leung J, Merlot S, Giraudat J** (1997) The Arabidopsis *ABSCISIC ACID-INSENSITIVE2* (*ABI2*) and *ABI1* genes encode homologous protein phosphatases 2C involved in abscisic acid signal transduction. *Plant Cell* **9**: 759–71
- Li W, Nguyen KH, Chu HD, Ha C Van, Watanabe Y, Osakabe Y, Leyva-González MA, Sato M, Toyooka K, Voges L, et al** (2017) The karrikin receptor *KAI2* promotes drought resistance in *Arabidopsis thaliana*. *PLOS Genet* **13**: e1007076
- Lim CW, Kim JH, Baek W, Kim BS, Lee SC** (2012) Functional roles of the protein phosphatase 2C, *AtAIP1*, in abscisic acid signaling and sugar tolerance in Arabidopsis. *Plant Sci* **187**: 83–88
- Des Marais DL, Auchincloss LC, Sukamtoh E, McKay JK, Logan T, Richards JH, Juenger TE** (2014) Variation in *MPK12* affects water use efficiency in *Arabidopsis* and reveals a pleiotropic link between guard cell size and ABA response. *PNAS* **111**: 2836–41
- Marin E, Nussaume L, Quesada A, Gonneau M, Sotta B, Huguency P, Frey A, Marion-Poll A** (1996) Molecular identification of zeaxanthin epoxidase of *Nicotiana plumbaginifolia*, a gene involved in abscisic acid biosynthesis and corresponding to the ABA locus of *Arabidopsis thaliana*. *EMBO J* **15**: 2331–2342
- Merlot S, Leonhardt N, Fenzi F, Valon C, Costa M, Piette L, Vavasseur A, Genty B, Boivin K, Müller A, et al** (2007) Constitutive activation of a plasma membrane H<sup>+</sup>-ATPase prevents abscisic acid-mediated stomatal closure. *EMBO J* **26**: 3216–3226
- Meyer K, Leube M, Grill E** (1994) A protein phosphatase 2C involved in ABA signal transduction in *Arabidopsis thaliana*. *Science* **264**: 1452–1455
- Meyer S, Mumm P, Imes D, Endler A, Weder B, Al-Rasheid KAS, Geiger D, Marten I, Martinoia E, Hedrich R** (2010) *AtALMT12* represents an R-type anion channel required for stomatal movement in Arabidopsis guard cells. *Plant J* **63**: 1054–1062
- Mustilli A, Merlot S, Vavasseur A, Fenzi F, Giraudat J** (2002) Arabidopsis OST1 protein kinase mediates the regulation of stomatal aperture by abscisic acid and acts upstream of reactive oxygen species production. *Plant Cell* **14**: 3089–3099
- Negi J, Matsuda O, Nagasawa T, Oba Y, Takahashi H, Kawai-Yamada M, Uchimiya H, Hashimoto M, Iba K** (2008) CO<sub>2</sub> regulator SLAC1 and its homologues are essential for anion homeostasis in plant cells. *Nature* **452**: 483–486
- North HM, Almeida A De, Boutin JP, Frey A, To A, Botran L, Sotta B, Marion-Poll A** (2007) The Arabidopsis ABA-deficient mutant *aba4* demonstrates that the major route for stress-induced ABA accumulation is via neoxanthin isomers. *Plant J* **50**: 810–824
- Piisilä M, Keceli MA, Brader G, Jakobson L, Jõesaar I, Sipari N, Kollist H, Palva E, Kariola T** (2015) The F-box protein MAX2 contributes

to resistance to bacterial phytopathogens in *Arabidopsis thaliana*. *BMC Plant Biol* **15**: 53

- Saez A, Apostolova N, Gonzalez-Guzman M, Gonzalez-Garcia MP, Nicolas C, Lorenzo O, Rodriguez PL** (2004) Gain-of-function and loss-of-function phenotypes of the protein phosphatase 2C *HABI* reveal its role as a negative regulator of abscisic acid signalling. *Plant J* **37**: 354-69
- Sasaki T, Mori IC, Furuichi T, Munemasa S, Toyooka K, Matsuoka K, Murata Y, Yamamoto Y** (2010) Closing plant stomata requires a homolog of an aluminum-activated malate transporter. *Plant Cell Physiol* **51**: 354–365
- Seo M, Peeters AJ, Koiwai H, Oritani T, Marion-Poll A, Zeevaart JA, Koornneef M, Kamiya Y, Koshiba T** (2000) The *Arabidopsis* aldehyde oxidase 3 (AAO3) gene product catalyzes the final step in abscisic acid biosynthesis in leaves. *PNAS* **97**: 12908–13
- Sierla M, Hōrak H, Overmyer K, Waszczak C, Yarmolinsky D, Maierhofer T, Vainonen JP, Salojärvi J, Denessiouk K, Laanemets K, et al** (2018) The receptor-like pseudokinase GHR1 is required for stomatal closure. *Plant Cell* **30**: 2813–2837
- Vahisalu T, Kollist H, Wang Y-F, Nishimura N, Chan W-Y, Valerio G, Lamminmäki A, Brosché M, Moldau H, Desikan R, et al** (2008) SLAC1 is required for plant guard cell S-type anion channel function in stomatal signalling. *Nature* **452**: 487–91
- Xiong L, Ishitani M, Lee H, Zhu JK** (2001) The *Arabidopsis* *LOS5/ABA3* locus encodes a molybdenum cofactor sulfurase and modulates cold stress- and osmotic stress-responsive gene expression. *Plant Cell* **13**: 2063–83
- Yoshida R, Hobo T, Ichimura K, Mizoguchi T, Takahashi F, Aronso J, Ecker JR, Shinozaki K** (2002) ABA-activated SnRK2 protein kinase is required for dehydration stress signaling in *Arabidopsis*. *Plant Cell Physiol* **43**: 1473–1483
- Zhang Y, Lv S, Wang G** (2018) Strigolactones are common regulators in induction of stomatal closure *in planta*. *Plant Signal Behav* **13**: e1444322

**Supplementary Table 2. High-frequency single nucleotide polymorphisms identified in T7-9 BC1F2 mapping population.**

| Chromosome | Mutation     | Frequency | AGI code  | Reference aa | Mutant aa | Annotation                                                   | Mutant lines  | Water loss |
|------------|--------------|-----------|-----------|--------------|-----------|--------------------------------------------------------------|---------------|------------|
| 3          | C 19007831 T | 0.95      | At3g51160 | E            | K         | GDP-D-MANNOSE-4,6-DEHYDRATASE2, GMD2, MUR1, MURUS 1          | <i>mur1-1</i> | high       |
|            |              |           |           |              |           |                                                              | <i>mur1-2</i> | high       |
|            |              |           |           |              |           |                                                              | SALK_057153   | high       |
| 3          | C 17388552 T | 0.93      | At3g47220 | R            | C         | ATPLC9, PHOSPHATIDYLINOSITOL-SPECIFIC PHOSPHOLIPASE C9, PLC9 | SALK_025949   | WT-like    |
|            |              |           |           |              |           |                                                              | SALK_021982   | WT-like    |
| 3          | C 17021471 T | 0.91      | At3g46330 | G            | D         | MATERNAL EFFECT EMBRYO ARREST39, MEE39                       | GK_277G01     | WT-like    |
|            |              |           |           |              |           |                                                              | SALK_108641   | WT-like    |
|            |              |           |           |              |           |                                                              | SALK_065070   | WT-like    |
| 3          | C 18009773 T | 0.91      | At3g48590 | E            | K         | ATHAP5A, HAP5A, NF-YC1, NUCLEAR FACTOR Y, SUBUNIT C1         | SALK_086334   | WT-like    |
| 3          | C 18556988 T | 0.91      | At3g50050 | R            | H         | Eukaryotic aspartyl protease family protein                  | SALK_038145   | WT-like    |



**Supplementary Table 3. Genotypes of F3 plants obtained from *ger1*<sup>-/-</sup> *ger2*<sup>+/-</sup> F2 plants.**

| F2 plant                                                             | F3 segregation                                            |                                                           |                                                           | n.d.* | n.g.** | Total |
|----------------------------------------------------------------------|-----------------------------------------------------------|-----------------------------------------------------------|-----------------------------------------------------------|-------|--------|-------|
|                                                                      | <i>ger1-2</i> <sup>-/-</sup> <i>ger2-1</i> <sup>+/+</sup> | <i>ger1-2</i> <sup>-/-</sup> <i>ger2-1</i> <sup>+/-</sup> | <i>ger1-2</i> <sup>-/-</sup> <i>ger2-1</i> <sup>-/-</sup> |       |        |       |
| <i>ger1-2</i> <sup>-/-</sup> <i>ger2-1</i> <sup>+/-</sup> plant 7/3  | 22                                                        | 23                                                        | -                                                         | -     | 3      | 48    |
| <i>ger1-2</i> <sup>-/-</sup> <i>ger2-1</i> <sup>+/-</sup> plant 9/5  | 24                                                        | 22                                                        | -                                                         | 1     | 1      | 48    |
|                                                                      | <i>ger1-2</i> <sup>-/-</sup> <i>ger2-2</i> <sup>+/+</sup> | <i>ger1-2</i> <sup>-/-</sup> <i>ger2-2</i> <sup>+/-</sup> | <i>ger1-2</i> <sup>-/-</sup> <i>ger2-2</i> <sup>-/-</sup> |       |        |       |
| <i>ger1-2</i> <sup>-/-</sup> <i>ger2-2</i> <sup>+/-</sup> plant 26/2 | 19                                                        | 20                                                        | -                                                         | -     | 1      | 40    |
| <i>ger1-2</i> <sup>-/-</sup> <i>ger2-2</i> <sup>+/-</sup> plant 33/3 | 22                                                        | 18                                                        | -                                                         | -     | -      | 40    |
|                                                                      | <i>ger1-3</i> <sup>-/-</sup> <i>ger2-1</i> <sup>+/+</sup> | <i>ger1-3</i> <sup>-/-</sup> <i>ger2-1</i> <sup>+/-</sup> | <i>ger1-3</i> <sup>-/-</sup> <i>ger2-1</i> <sup>-/-</sup> |       |        |       |
| <i>ger1-3</i> <sup>-/-</sup> <i>ger2-1</i> <sup>+/-</sup> plant 28/2 | 17                                                        | 23                                                        | -                                                         | -     | -      | 40    |
| <i>ger1-3</i> <sup>-/-</sup> <i>ger2-1</i> <sup>+/-</sup> plant 31/8 | 28                                                        | 11                                                        | -                                                         | 1     | -      | 40    |
|                                                                      | <i>ger1-3</i> <sup>-/-</sup> <i>ger2-2</i> <sup>+/+</sup> | <i>ger1-3</i> <sup>-/-</sup> <i>ger2-2</i> <sup>+/-</sup> | <i>ger1-3</i> <sup>-/-</sup> <i>ger2-2</i> <sup>-/-</sup> |       |        |       |
| <i>ger1-3</i> <sup>-/-</sup> <i>ger2-2</i> <sup>+/-</sup> plant 37/5 | 19                                                        | 21                                                        | -                                                         | -     | -      | 40    |
| <i>ger1-3</i> <sup>-/-</sup> <i>ger2-2</i> <sup>+/-</sup> plant 38/6 | 19                                                        | 16                                                        | -                                                         | 1     | 4      | 40    |

\* not determined; \*\* not germinated

## Parsed Citations

- Amsbury S, Hunt L, Elhaddad N, Baillie A, Lundgren M, Verhertruggen Y, Scheller H V, Knox JP, Fleming AJ, Gray JE (2016) Stomatal function requires pectin de-methyl-esterification of the guard cell wall. *Curr Biol* 26: 2899–2906**  
Pubmed: [Author and Title](#)  
Google Scholar: [Author Only](#) [Title Only](#) [Author and Title](#)
- Anderson CT, Wallace IS, Somerville CR (2012) Metabolic click-labeling with a fucose analog reveals pectin delivery, architecture, and dynamics in Arabidopsis cell walls. *PNAS* 109: 1329–1334**  
Pubmed: [Author and Title](#)  
Google Scholar: [Author Only](#) [Title Only](#) [Author and Title](#)
- Bankevich A, Nurk S, Antipov D, Gurevich AA, Dvorkin M, Kulikov AS, Lesin VM, Nikolenko SI, Pham S, Pribelski AD, et al (2012) SPAdes: a new genome assembly algorithm and its applications to single-cell sequencing. *J Comput Biol* 19: 455–77**  
Pubmed: [Author and Title](#)  
Google Scholar: [Author Only](#) [Title Only](#) [Author and Title](#)
- Bar-Peled M, O'Neill MA (2011) Plant nucleotide sugar formation, interconversion, and salvage by sugar recycling. *Annu Rev Plant Biol* 62: 127–155**  
Pubmed: [Author and Title](#)  
Google Scholar: [Author Only](#) [Title Only](#) [Author and Title](#)
- Bolger AM, Lohse M, Usadel B (2014) Trimmomatic: a flexible trimmer for Illumina sequence data. *Bioinformatics* 30: 2114–2120**  
Pubmed: [Author and Title](#)  
Google Scholar: [Author Only](#) [Title Only](#) [Author and Title](#)
- Bonin CP, Freshour G, Hahn MG, Vanzin GF, Reiter W-D, Hahn MG (2003) The GMD1 and GMD2 genes of Arabidopsis encode isoforms of GDP-D-mannose 4,6-dehydratase with cell typespecific expression patterns. *Plant Physiol* 132: 883–92**  
Pubmed: [Author and Title](#)  
Google Scholar: [Author Only](#) [Title Only](#) [Author and Title](#)
- Bonin CP, Potter I, Vanzin GF, Reiter W-D (1997) The MUR1 gene of Arabidopsis thaliana encodes an isoform of GDP-D-mannose-4,6-dehydratase, catalyzing the first step in the de novo synthesis of GDP-L-fucose. *PNAS* 94: 2085–2090**  
Pubmed: [Author and Title](#)  
Google Scholar: [Author Only](#) [Title Only](#) [Author and Title](#)
- Bonin CP, Reiter WD (2000) A bifunctional epimerase-reductase acts downstream of the MUR1 gene product and completes the de novo synthesis of GDP-L-fucose in Arabidopsis. *Plant J* 21: 445–454**  
Pubmed: [Author and Title](#)  
Google Scholar: [Author Only](#) [Title Only](#) [Author and Title](#)
- Bouton S, Leboeuf E, Mouille G, Leydecker MT, Talbotec J, Granier F, Lahaye M, Höfte H, Truong HN (2002) QUASIMODO1 encodes a putative membrane-bound glycosyltransferase required for normal pectin synthesis and cell adhesion in Arabidopsis. *Plant Cell* 14: 2577–2590**  
Pubmed: [Author and Title](#)  
Google Scholar: [Author Only](#) [Title Only](#) [Author and Title](#)
- Brandt B, Munemasa S, Wang C, Nguyen D, Yong T, Yang PG, Poretsky E, Belknap TF, Waadt R, Aleman F, et al (2015) Calcium specificity signaling mechanisms in abscisic acid signal transduction in Arabidopsis guard cells. *Elife* 4: e03599**  
Pubmed: [Author and Title](#)  
Google Scholar: [Author Only](#) [Title Only](#) [Author and Title](#)
- Caffall KH, Mohnen D (2009) The structure, function, and biosynthesis of plant cell wall pectic polysaccharides. *Carbohydr Res* 344: 1879–1900**  
Pubmed: [Author and Title](#)  
Google Scholar: [Author Only](#) [Title Only](#) [Author and Title](#)
- Carter R, Woolfenden H, Baillie A, Amsbury S, Carroll S, Healicon E, Sovatzoglou S, Braybrook S, Gray JE, Hobbs J, et al (2017) Stomatal opening involves polar, not radial, stiffening of guard cells. *Curr Biol* 27: 2974-2983.e2**  
Pubmed: [Author and Title](#)  
Google Scholar: [Author Only](#) [Title Only](#) [Author and Title](#)
- Cavalier DM, Lerouxel O, Neumetzler L, Yamauchi K, Reinecke A, Freshour G, Zobotina OA, Hahn MG, Burgert I, Pauly M, et al (2008) Disrupting two Arabidopsis thaliana xylosyltransferase genes results in plants deficient in xyloglucan, a major primary cell wall component. *Plant Cell* 20: 1519–1537**  
Pubmed: [Author and Title](#)  
Google Scholar: [Author Only](#) [Title Only](#) [Author and Title](#)
- Chalfoun J, Majurski M, Blattner T, Bhadriraju K, Keyrouz W, Bajcsy P, Brady M (2017) MIST: accurate and scalable microscopy image stitching tool with stage modeling and error minimization. *Sci Rep* 7: 4988**  
Pubmed: [Author and Title](#)  
Google Scholar: [Author Only](#) [Title Only](#) [Author and Title](#)
- Chou YH, Pogorelko G, Young ZT, Zobotina OA (2015) Protein-protein interactions among xyloglucan-synthesizing enzymes and**

**formation of Golgi-localized multiprotein complexes. Plant Cell Physiol 56: 255–267**

Pubmed: [Author and Title](#)

Google Scholar: [Author Only Title Only Author and Title](#)

**Cingolani P, Platts A, Wang LL, Coon M, Nguyen T, Wang L, Land SJ, Lu X, Ruden DM (2012) A program for annotating and predicting the effects of single nucleotide polymorphisms, SnpEff: SNPs in the genome of *Drosophila melanogaster* strain w1118; iso-2; iso-3. Fly (Austin) 6: 80–92**

Pubmed: [Author and Title](#)

Google Scholar: [Author Only Title Only Author and Title](#)

**Cui F, Brosché M, Lehtonen MT, Amiryousefi A, Xu E, Punkkinen M, Valkonen JP, Fujii H, Overmyer K (2016) Dissecting abscisic acid signaling pathways involved in cuticle formation. Mol Plant 9: 926–938**

Pubmed: [Author and Title](#)

Google Scholar: [Author Only Title Only Author and Title](#)

**Czechowski T, Stitt M, Altmann T, Udvardi MK, Scheible W-R (2005) Genome-wide identification and testing of superior reference genes for transcript normalization in *Arabidopsis*. Plant Physiol 139: 5–17**

Pubmed: [Author and Title](#)

Google Scholar: [Author Only Title Only Author and Title](#)

**Delmas F, Séveno M, Northey JGB, Hernould M, Lerouge P, McCourt P, Chevalier C (2008) The synthesis of the rhamnogalacturonan II component 3-deoxy-D-manno-2-oculosonic acid (Kdo) is required for pollen tube growth and elongation. J Exp Bot 59: 2639–2647**

Pubmed: [Author and Title](#)

Google Scholar: [Author Only Title Only Author and Title](#)

**Diekmann W, Hedrich R, Raschke K, Robinson DG (1993) Osmocytosis and vacuolar fragmentation in guard cell protoplasts: Their relevance to osmotically-induced volume changes in guard cells. J Exp Bot 44: 1569–1577**

Pubmed: [Author and Title](#)

Google Scholar: [Author Only Title Only Author and Title](#)

**Duursma RA, Blackman CJ, López R, Martin-StPaul NK, Cochard H, Medlyn BE (2019) On the minimum leaf conductance: its role in models of plant water use, and ecological and environmental controls. New Phytol 221: 693–705**

Pubmed: [Author and Title](#)

Google Scholar: [Author Only Title Only Author and Title](#)

**Egelund J, Damager I, Faber K, Olsen C-E, Ulvskov P, Petersen BL (2008) Functional characterisation of a putative rhamnogalacturonan II specific xylosyltransferase. FEBS Lett 582: 3217–3222**

Pubmed: [Author and Title](#)

Google Scholar: [Author Only Title Only Author and Title](#)

**Egelund J, Petersen BL, Motawia MS, Damager I, Faik A, Olsen CE, Ishii T, Clausen H, Ulvskov P, Geshi N (2006) *Arabidopsis thaliana* RGXT1 and RGXT2 encode Golgi-localized (1,3)-alpha-D-xylosyltransferases involved in the synthesis of pectic rhamnogalacturonan-II. Plant Cell 18: 2593–2607**

Pubmed: [Author and Title](#)

Google Scholar: [Author Only Title Only Author and Title](#)

**Ehonen S, Yarmolinsky D, Kollist H, Kangasjärvi J (2019) Reactive oxygen species, photosynthesis, and environment in the regulation of stomata. Antioxidants Redox Signal 30: 1220–1237**

Pubmed: [Author and Title](#)

Google Scholar: [Author Only Title Only Author and Title](#)

**Franks PJ, Buckley TN, Shope JC, Mott KA (2001) Guard cell volume and pressure measured concurrently by confocal microscopy and the cell pressure probe. Plant Physiol 125: 1577–1584**

Pubmed: [Author and Title](#)

Google Scholar: [Author Only Title Only Author and Title](#)

**Franks PJ, Cowan IR, Farquhar GD (1998) A study of stomatal mechanics using the cell pressure probe. Plant, Cell Environ 21: 94–100**

Pubmed: [Author and Title](#)

Google Scholar: [Author Only Title Only Author and Title](#)

**Fujii H, Zhu JK (2009) *Arabidopsis* mutant deficient in 3 abscisic acid-activated protein kinases reveals critical roles in growth, reproduction, and stress. PNAS 106: 8380–8385**

Pubmed: [Author and Title](#)

Google Scholar: [Author Only Title Only Author and Title](#)

**Funakawa H, Miwa K (2015) Synthesis of borate cross-linked rhamnogalacturonan II. Front Plant Sci 6: 223**

Pubmed: [Author and Title](#)

Google Scholar: [Author Only Title Only Author and Title](#)

**Gao XQ, Li CG, Wei PC, Zhang XY, Chen J, Wang XC (2005) The dynamic changes of tonoplasts in guard cells are important for stomatal movement in *Vicia faba*. Plant Physiol 139: 1207–1216**

Pubmed: [Author and Title](#)

Google Scholar: [Author Only Title Only Author and Title](#)

**Geiger D, Scherzer S, Mumm P, Stange A, Marten I, Bauer H, Ache P, Matschi S, Liese A, Al-Rasheid KA, et al (2009) Activity of guard**

**cell anion channel SLAC1 is controlled by droughtstress signaling kinase-phosphatase pair. PNAS 106: 21425–21430**

Pubmed: [Author and Title](#)

Google Scholar: [Author Only](#) [Title Only](#) [Author and Title](#)

**González-Guzmán M, Apostolova N, Bellés JM, Barrero JM, Piqueras P, Ponce MR, Micol JL, Serrano R, Rodríguez PL (2002) The short-chain alcohol dehydrogenase ABA2 catalyzes the conversion of xanthoxin to abscisic aldehyde. Plant Cell 14: 1833–46**

Pubmed: [Author and Title](#)

Google Scholar: [Author Only](#) [Title Only](#) [Author and Title](#)

**Ha C V, Leyva-González MA, Osakabe Y, Tran UT, Nishiyama R, Watanabe Y, Tanaka M, Seki M, Yamaguchi S, Dong N Van, et al (2014) Positive regulatory role of strigolactone in plant responses to drought and salt stress. PNAS 111: 851–6**

Pubmed: [Author and Title](#)

Google Scholar: [Author Only](#) [Title Only](#) [Author and Title](#)

**Harholt J, Suttangkakul A, Vibe Scheller H (2010) Biosynthesis of pectin. Plant Physiol 153: 384–95**

Pubmed: [Author and Title](#)

Google Scholar: [Author Only](#) [Title Only](#) [Author and Title](#)

**Hartwig B, James GV, Konrad K, Schneeberger K, Turck F (2012) Fast isogenic mappingbysequencing of ethyl methanesulfonate-induced mutant bulks. Plant Physiol 160: 591600**

Pubmed: [Author and Title](#)

Google Scholar: [Author Only](#) [Title Only](#) [Author and Title](#)

**Hashimoto M, Negi J, Young J, Israelsson M, Schroeder JI, Iba K (2006) Arabidopsis HT1 kinase controls stomatal movements in response to CO<sub>2</sub>. Nat Cell Biol 8: 391–397**

Pubmed: [Author and Title](#)

Google Scholar: [Author Only](#) [Title Only](#) [Author and Title](#)

**Hedrich R (2012) Ion channels in plants. Physiol Rev 92: 1777–811**

Pubmed: [Author and Title](#)

Google Scholar: [Author Only](#) [Title Only](#) [Author and Title](#)

**Van Hengel AJ, Roberts K (2002) Fucosylated arabinogalactan-proteins are required for full root cell elongation in arabidopsis. Plant J 32: 105–113**

Pubmed: [Author and Title](#)

Google Scholar: [Author Only](#) [Title Only](#) [Author and Title](#)

**Hörak H, Sierla M, Töldsepp K, Wang C, Wang Y-S, Nuhkat M, Valk E, Pechter P, Merilo E, Salojärvi J, et al (2016) A dominant mutation in the HT1 kinase uncovers roles of MAP kinases and GHR1 in CO<sub>2</sub>-induced stomatal closure. Plant Cell 28: 2493–2509**

Pubmed: [Author and Title](#)

Google Scholar: [Author Only](#) [Title Only](#) [Author and Title](#)

**Hunt L, Amsbury S, Baillie A, Movahedi M, Mitchell A, Afsharinafar M, Swarup K, Denyer T, Hobbs JK, Swarup R, et al (2017) Formation of the stomatal outer cuticular ledge requires a guard cell wall proline-rich protein. Plant Physiol 174: 689–699**

Pubmed: [Author and Title](#)

Google Scholar: [Author Only](#) [Title Only](#) [Author and Title](#)

**Jones L, Milne JL, Ashford D, McQueen-Mason SJ (2003) Cell wall arabinan is essential for guard cell function. PNAS 100: 11783–11788**

Pubmed: [Author and Title](#)

Google Scholar: [Author Only](#) [Title Only](#) [Author and Title](#)

**Kadota Y, Sklenar J, Derbyshire P, Stransfeld L, Asai S, Ntoukakis V, Jones JD, Shirasu K, Menke F, Jones A, et al (2014) Direct regulation of the NADPH oxidase RBOHD by the PRR-associated kinase BIK1 during plant immunity. Mol Cell 54: 43–55**

Pubmed: [Author and Title](#)

Google Scholar: [Author Only](#) [Title Only](#) [Author and Title](#)

**Kalliola M, Jakobson L, Davidsson P, Pennanen V, Waszczak C, Yarmolinsky D, Zamora O, Palva ET, Kariola T, Kollist H, et al (2020) Differential role of MAX2 and strigolactones in pathogen, ozone, and stomatal responses. Plant Direct 4: e00206**

Pubmed: [Author and Title](#)

Google Scholar: [Author Only](#) [Title Only](#) [Author and Title](#)

**Kasai K, Takano J, Miwa K, Toyoda A, Fujiwara T (2011) High boron-induced ubiquitination regulates vacuolar sorting of the BOR1 borate transporter in Arabidopsis thaliana. J Biol Chem 286: 6175–6183**

Pubmed: [Author and Title](#)

Google Scholar: [Author Only](#) [Title Only](#) [Author and Title](#)

**Kim YS, Schumaker KS, Zhu JK (2006) EMS mutagenesis of Arabidopsis. Methods Mol Biol 323: 101–103**

Pubmed: [Author and Title](#)

Google Scholar: [Author Only](#) [Title Only](#) [Author and Title](#)

**Kollist T, Moldau H, Rasulov B, Oja V, Ramma H, Huve K, Jaspers P, Kangasjarvi J, Kollist H (2007) A novel device detects a rapid ozone-induced transient stomatal closure in intact Arabidopsis and its absence in abi2 mutant. Physiol Plant 129: 796–803**

Pubmed: [Author and Title](#)

Google Scholar: [Author Only](#) [Title Only](#) [Author and Title](#)

**Kong Y, Peña MJ, Renna L, Avci U, Pattathil S, Tuomivaara ST, Li X, Reiter WD, Brandizzi F, Hahn MG, et al (2015) Galactose-depleted xyloglucan is dysfunctional and leads to dwarfism in Arabidopsis. Plant Physiol 167: 1296–1306**

Pubmed: [Author and Title](#)

Google Scholar: [Author Only](#) [Title Only](#) [Author and Title](#)

**Kotake T, Hojo S, Tajima N, Matsuoka K, Koyama T, Tsumuraya Y (2008) A bifunctional enzyme with L-fucokinase and GDP-L-fucose pyrophosphorylase activities salvages free L-fucose in Arabidopsis. J Biol Chem 283: 8125–8135**

Pubmed: [Author and Title](#)

Google Scholar: [Author Only](#) [Title Only](#) [Author and Title](#)

**Krupková E, Immerzeel P, Pauly M, Schmülling T (2007) The TUMOROUS SHOOT DEVELOPMENT2 gene of Arabidopsis encoding a putative methyltransferase is required for cell adhesion and co-ordinated plant development. Plant J 50: 735–750**

Pubmed: [Author and Title](#)

Google Scholar: [Author Only](#) [Title Only](#) [Author and Title](#)

**Kwak JM, Mori IC, Pei Z-M, Leonhardt N, Torres MA, Dangl JL, Bloom RE, Bodde S, Jones JDG, Schroeder JI (2003) NADPH oxidase AtrbohD and AtrbohF genes function in ROS-dependent ABA signaling in Arabidopsis. EMBO J 22: 2623–33**

Pubmed: [Author and Title](#)

Google Scholar: [Author Only](#) [Title Only](#) [Author and Title](#)

**Langmead B, Salzberg SL (2012) Fast gapped-read alignment with Bowtie 2. Nat Methods 9: 357–359**

Pubmed: [Author and Title](#)

Google Scholar: [Author Only](#) [Title Only](#) [Author and Title](#)

**Lawson T, Matthews J (2020) Guard cell metabolism and stomatal function. Annu Rev Plant Biol 71: 273-302**

Pubmed: [Author and Title](#)

Google Scholar: [Author Only](#) [Title Only](#) [Author and Title](#)

**Lee SC, Lan W, Buchanan BB, Luan S (2009) A protein kinase-phosphatase pair interacts with an ion channel to regulate ABA signaling in plant guard cells. PNAS 106: 21419–24**

Pubmed: [Author and Title](#)

Google Scholar: [Author Only](#) [Title Only](#) [Author and Title](#)

**Leonard R, Costa G, Darrambide E, Lhernould S, Fleurat-Lessard P, Carlue M, Gomord V, Faye L, Maftah A (2002) The presence of Lewis a epitopes in Arabidopsis thaliana glycoconjugates depends on an active  $\alpha$ 4-fucosyltransferase gene. Glycobiology 12: 299–306**

Pubmed: [Author and Title](#)

Google Scholar: [Author Only](#) [Title Only](#) [Author and Title](#)

**Levesque-Tremblay G, Pelloux J, Braybrook SA, Müller K (2015) Tuning of pectin methylesterification: consequences for cell wall biomechanics and development. Planta 242: 791811**

Pubmed: [Author and Title](#)

Google Scholar: [Author Only](#) [Title Only](#) [Author and Title](#)

**Liang Y, Basu D, Pattathil S, Xu W, Venetos A, Martin SL, Faik A, Hahn MG, Showalter AM (2013) Biochemical and physiological characterization of fut4 and fut6 mutants defective in arabinogalactan-protein fucosylation in Arabidopsis. J Exp Bot 64: 5537–5551**

Pubmed: [Author and Title](#)

Google Scholar: [Author Only](#) [Title Only](#) [Author and Title](#)

**Liepmann AH, Wightman R, Geshi N, Turner SR, Scheller HV (2010) Arabidopsis - a powerful model system for plant cell wall research. Plant J 61: 1107–1121**

Pubmed: [Author and Title](#)

Google Scholar: [Author Only](#) [Title Only](#) [Author and Title](#)

**Liu X-L, Liu L, Niu Q-K, Xia C, Yang K-Z, Li R, Chen L-Q, Zhang X-Q, Zhou Y, Ye D (2011) MALE GAMETOPHYTE DEFECTIVE 4 encodes a rhamnogalacturonan II xylosyltransferase and is important for growth of pollen tubes and roots in Arabidopsis. Plant J 65: 647–660**

Pubmed: [Author and Title](#)

Google Scholar: [Author Only](#) [Title Only](#) [Author and Title](#)

**Madson M, Dunand C, Li X, Verma R, Vanzin GF, Caplan J, Shoue DA, Carpita NC, Reiter WD (2003) The MUR3 gene of Arabidopsis encodes a xyloglucan galactosyltransferase that is evolutionarily related to animal exostosins. Plant Cell 15: 1662–1670**

Pubmed: [Author and Title](#)

Google Scholar: [Author Only](#) [Title Only](#) [Author and Title](#)

**Maierhofer T, Diekmann M, Offenborn JN, Lind C, Bauer H, Hashimoto K, KASAR, Luan S, Kudla J, Geiger D, et al (2014) Site- and kinase-specific phosphorylation-mediated activation of SLAC1, a guard cell anion channel stimulated by abscisic acid. Sci Signal 7: ra86**

Pubmed: [Author and Title](#)

Google Scholar: [Author Only](#) [Title Only](#) [Author and Title](#)

**Martin M (2011) Cutadapt removes adapter sequences from high-throughput sequencing reads. EMBnet.journal 17: 10**

Pubmed: [Author and Title](#)

Google Scholar: [Author Only](#) [Title Only](#) [Author and Title](#)

**Matsuura K, Miyagawa I, Kobayashi M, Ohta D, Match T (2003) Arabidopsis 3-deoxy-D-manno-oct-2-ulosonate-8-phosphate synthase: cDNA cloning and expression analyses. J Exp Bot 54: 17851787**

Pubmed: [Author and Title](#)



Google Scholar: [Author Only](#) [Title Only](#) [Author and Title](#)

**McAinsh MR, Clayton H, Mansfield TA, Hetherington AM (1996) Changes in stomatal behavior and guard cell cytosolic free calcium in response to oxidative stress. *Plant Physiol* 111: 1031–1042**

Pubmed: [Author and Title](#)

Google Scholar: [Author Only](#) [Title Only](#) [Author and Title](#)

**Meckel T, Gall L, Semrau S, Homann U, Thiel G (2007) Guard cells elongate: Relationship of volume and surface area during stomatal movement. *Biophys J* 92: 1072–1080**

Pubmed: [Author and Title](#)

Google Scholar: [Author Only](#) [Title Only](#) [Author and Title](#)

**Merced A, Renzaglia KS (2018) Contrasting pectin polymers in guard cell walls of *Arabidopsis* and the hornwort *Phaeoceros* reflect physiological differences. *Ann Bot* 123: 579–585**

Pubmed: [Author and Title](#)

Google Scholar: [Author Only](#) [Title Only](#) [Author and Title](#)

**Merilo E, Yarmolinsky D, Jalakas P, Parik H, Tulva I, Rasulov B, Kilk K, Kollist H (2018) Stomatal VPD response: There is more to the story than ABA. *Plant Physiol* 176: 851–864**

Pubmed: [Author and Title](#)

Google Scholar: [Author Only](#) [Title Only](#) [Author and Title](#)

**Merlot S, Leonhardt N, Fenzi F, Valon C, Costa M, Piette L, Vavasseur A, Genty B, Boivin K, Müller A, et al (2007) Constitutive activation of a plasma membrane H<sup>+</sup>-ATPase prevents abscisic acid-mediated stomatal closure. *EMBO J* 26: 3216–26**

Pubmed: [Author and Title](#)

Google Scholar: [Author Only](#) [Title Only](#) [Author and Title](#)

**Miwa K, Wakuta S, Takada S, Ide K, Takano J, Naito S, Omori H, Matsunaga T, Fujiwara T (2013) Roles of BOR2, a boron exporter, in cross linking of rhamnogalacturonan II and root elongation under boron limitation in *Arabidopsis*. *Plant Physiol* 163: 1699–709**

Pubmed: [Author and Title](#)

Google Scholar: [Author Only](#) [Title Only](#) [Author and Title](#)

**Mouille G, Ralet M-C, Cavelier C, Eland C, Effroy D, Hématy K, McCartney L, Truong HN, Gaudon V, Thibault J-F, et al (2007) Homogalacturonan synthesis in *Arabidopsis thaliana* requires a Golgi-localized protein with a putative methyltransferase domain. *Plant J* 50: 605–614**

Pubmed: [Author and Title](#)

Google Scholar: [Author Only](#) [Title Only](#) [Author and Title](#)

**Nagai T, Yamada S, Tominaga T, Ichikawa M, Miyawaki A (2004) Expanded dynamic range of fluorescent indicators for Ca<sup>2+</sup> by circularly permuted yellow fluorescent proteins. *PNAS* 101: 10554–10559**

Pubmed: [Author and Title](#)

Google Scholar: [Author Only](#) [Title Only](#) [Author and Title](#)

**Nakayama KI, Maeda Y, Jigami Y (2003) Interaction of GDP-4-keto-6-deoxymannose-3,5-epimerase-4-reductase with GDP-mannose-4,6-dehydratase stabilizes the enzyme activity for formation of GDP-fucose from GDP-mannose. *Glycobiology* 13: 673–680**

Pubmed: [Author and Title](#)

Google Scholar: [Author Only](#) [Title Only](#) [Author and Title](#)

**Neumetzler L, Humphrey T, Lumba S, Snyder S, Yeats TH, Usadel B, Vasilevski A, Patel J, Rose JKC, Persson S, et al (2012) The FRIABLE1 gene product affects cell adhesion in *Arabidopsis*. *PLoS One* 7: e42914**

Pubmed: [Author and Title](#)

Google Scholar: [Author Only](#) [Title Only](#) [Author and Title](#)

**Noguchi K, Yasumori M, Imai T, Naito S, Matsunaga T, Oda H, Hayashi H, Chino M, Fujiwara T (1997) bor1-1, an *Arabidopsis thaliana* mutant that requires a high level of boron. *Plant Physiol* 115: 901–906**

Pubmed: [Author and Title](#)

Google Scholar: [Author Only](#) [Title Only](#) [Author and Title](#)

**O'Neill MA, Eberhard S, Albersheim P, Darvill AG (2001) Requirement of borate cross-linking of cell wall rhamnogalacturonan II for *Arabidopsis* growth. *Science* 294: 846–849**

Pubmed: [Author and Title](#)

Google Scholar: [Author Only](#) [Title Only](#) [Author and Title](#)

**Ossowski S, Schneeberger K, Clark RM, Lanz C, Warthmann N, Weigel D (2008) Sequencing of natural strains of *Arabidopsis thaliana* with short reads. *Genome Res* 18: 2024–2033**

Pubmed: [Author and Title](#)

Google Scholar: [Author Only](#) [Title Only](#) [Author and Title](#)

**Overmyer K, Tuominen H, Kettunen R, Betz C, Langebartels C, Sandermann H, Kangasjärvi J (2000) Ozone-sensitive *Arabidopsis rcd1* mutant reveals opposite roles for ethylene and jasmonate signaling pathways in regulating superoxide-dependent cell death. *Plant Cell* 12: 1849–62**

Pubmed: [Author and Title](#)

Google Scholar: [Author Only](#) [Title Only](#) [Author and Title](#)

**Pabst M, Fischl RM, Brecker L, Morelle W, Fauland A, Köfeler H, Altmann F, Léonard R (2013) Rhamnogalacturonan II structure shows**

**variation in the side chains monosaccharide composition and methylation status within and across different plant species. Plant J 76: 61–72**

Pubmed: [Author and Title](#)

Google Scholar: [Author Only Title Only Author and Title](#)

**Panter PE, Kent O, Dale M, Smith SJ, Skipsey M, Thorlby G, Cummins I, Ramsay N, Begum RA, Sanhueza D, et al (2019) MUR1-mediated cell-wall fucosylation is required for freezing tolerance in *Arabidopsis thaliana*. New Phytol 224: 1518-1531**

Pubmed: [Author and Title](#)

Google Scholar: [Author Only Title Only Author and Title](#)

**Pei Z-M, Murata Y, Benning G, Thomine S, Klüsener B, Allen GJ, Grill E, Schroeder JI (2000) Calcium channels activated by hydrogen peroxide mediate abscisic acid signalling in guard cells. Nature 406: 731–734**

Pubmed: [Author and Title](#)

Google Scholar: [Author Only Title Only Author and Title](#)

**Perrin RM, DeRocher AE, Bar-Peled M, Zeng W, Norambuena L, Orellana A, Raikhel N V., Keegstra K (1999) Xyloglucan fucosyltransferase, an enzyme involved in plant cell wall biosynthesis. Science 284: 1976–1979**

Pubmed: [Author and Title](#)

Google Scholar: [Author Only Title Only Author and Title](#)

**Piisilä M, Keceli MA, Brader G, Jakobson L, Jõesaar I, Sipari N, Kollist H, Palva E, Kariola T (2015) The F-box protein MAX2 contributes to resistance to bacterial phytopathogens in *Arabidopsis thaliana*. BMC Plant Biol 15: 53**

Pubmed: [Author and Title](#)

Google Scholar: [Author Only Title Only Author and Title](#)

**Poplin R, Ruano-Rubio V, DePristo MA, Fennell TJ, Carneiro MO, Auwera GA Van der, Kling DE, Gauthier LD, Levy-Moonshine A, Roazen D, et al (2017) Scaling accurate genetic variant discovery to tens of thousands of samples. bioRxiv 201178**

Pubmed: [Author and Title](#)

Google Scholar: [Author Only Title Only Author and Title](#)

**Popper ZA (2008) Evolution and diversity of green plant cell walls. Curr Opin Plant Biol 11: 286–292**

Pubmed: [Author and Title](#)

Google Scholar: [Author Only Title Only Author and Title](#)

**Price AH (1990) A possible role for calcium in oxidative plant stress. Free Radic Res 10: 345–349**

Pubmed: [Author and Title](#)

Google Scholar: [Author Only Title Only Author and Title](#)

**Rautengarten C, Ebert B, Liu L, Stonebloom S, Smith-Moritz AM, Pauly M, Orellana A, Scheller HV, Heazlewood JL (2016) The *Arabidopsis* Golgi-localized GDP-L-fucose transporter is required for plant development. Nat Commun 7: 12119**

Pubmed: [Author and Title](#)

Google Scholar: [Author Only Title Only Author and Title](#)

**Reiter W-D, Chapple CCS, Somerville CR (1993) Altered growth and cell walls in a fucose-deficient mutant of *Arabidopsis*. Science 261: 1032–1035**

Pubmed: [Author and Title](#)

Google Scholar: [Author Only Title Only Author and Title](#)

**Reiter WD, Chapple C, Somerville CR (1997) Mutants of *Arabidopsis thaliana* with altered cell wall polysaccharide composition. Plant J 12: 335–345**

Pubmed: [Author and Title](#)

Google Scholar: [Author Only Title Only Author and Title](#)

**Rhomberg S, Fuchsluger C, Rendić D, Paschinger K, Jantsch V, Kosma P, Wilson IBH (2006) Reconstitution in vitro of the GDP-fucose biosynthetic pathways of *Caenorhabditis elegans* and *Drosophila melanogaster*. FEBS J 273: 2244–2256**

Pubmed: [Author and Title](#)

Google Scholar: [Author Only Title Only Author and Title](#)

**Rips S, Frank M, Elting A, Offenborn JN, von Schaeuwen A (2017) Golgi  $\alpha$ 1,4-fucosyltransferase of *Arabidopsis thaliana* partially localizes at the nuclear envelope. Traffic 18: 646–657**

Pubmed: [Author and Title](#)

Google Scholar: [Author Only Title Only Author and Title](#)

**Rui Y, Anderson CT (2016) Functional analysis of cellulose and xyloglucan in the walls of stomatal guard cells of *Arabidopsis*. Plant Physiol 170: 1398–1419**

Pubmed: [Author and Title](#)

Google Scholar: [Author Only Title Only Author and Title](#)

**Rui Y, Chen Y, Kandemir B, Yi H, Wang JZ, Puri VM, Anderson CT (2018) Balancing strength and flexibility: how the synthesis, organization, and modification of guard cell walls govern stomatal development and dynamics. Front Plant Sci 9: 1202**

Pubmed: [Author and Title](#)

Google Scholar: [Author Only Title Only Author and Title](#)

**Rui Y, Xiao C, Yi H, Kandemir B, Wang JZ, Puri VM, Anderson CT (2017) POLYGALACTURONASE INVOLVED IN EXPANSION3 functions in seedling development, rosette growth, and stomatal dynamics in *Arabidopsis thaliana*. Plant Cell 29: 2413–2432**



Pubmed: [Author and Title](#)

Google Scholar: [Author Only Title Only Author and Title](#)

**Sarria R, Wagner TA, O'Neill MA, Faik A, Wilkerson CG, Keegstra K, Raikhel N V. (2001) Characterization of a family of Arabidopsis genes related to xyloglucan fucosyltransferase1. Plant Physiol 127: 1595-606**

Pubmed: [Author and Title](#)

Google Scholar: [Author Only Title Only Author and Title](#)

**Schindelin J, Arganda-Carreras I, Frise E, Kaynig V, Longair M, Pietzsch T, Preibisch S, Rueden C, Saalfeld S, Schmid B, et al (2012) Fiji: an open-source platform for biological-image analysis. Nat Methods 9: 676–682**

Pubmed: [Author and Title](#)

Google Scholar: [Author Only Title Only Author and Title](#)

**Schneeberger K, Hagmann J, Ossowski S, Warthmann N, Gesing S, Kohlbacher O, Weigel D (2009) Simultaneous alignment of short reads against multiple genomes. Genome Biol 10: R98**

Pubmed: [Author and Title](#)

Google Scholar: [Author Only Title Only Author and Title](#)

**Schneider CA, Rasband WS, Eliceiri KW (2012) NIH Image to ImageJ: 25 years of image analysis. Nat Methods 9: 671–5**

Pubmed: [Author and Title](#)

Google Scholar: [Author Only Title Only Author and Title](#)

**Sechet J, Htwe S, Urbanowicz B, Agyeman A, Feng W, Ishikawa T, Colomes M, Kumar KS, Kawai-Yamada M, Dinneny JR, et al (2018) Suppression of Arabidopsis GGLT1 affects growth by reducing the L-galactose content and borate cross-linking of rhamnogalacturonan-II. Plant J 96: 1036–1050**

Pubmed: [Author and Title](#)

Google Scholar: [Author Only Title Only Author and Title](#)

**Shope JC, DeWald DB, Mott KA (2003) Changes in surface area of intact guard cells are correlated with membrane internalization. Plant Physiol 133: 1314–21**

Pubmed: [Author and Title](#)

Google Scholar: [Author Only Title Only Author and Title](#)

**Shtein I, Shelef Y, Marom Z, Zelinger E, Schwartz A, Popper ZA, Bar-On B, Harpaz-Saad S (2017) Stomatal cell wall composition: distinctive structural patterns associated with different phylogenetic groups. Ann Bot 119: 1021–1033**

Pubmed: [Author and Title](#)

Google Scholar: [Author Only Title Only Author and Title](#)

**Sierla M, Hörak H, Overmyer K, Waszczak C, Yarmolinsky D, Maierhofer T, Vainonen JP, Salojärvi J, Denessiouk K, Laanemets K, et al (2018) The receptor-like pseudokinase GHR1 is required for stomatal closure. Plant Cell 30: 2813–2837**

Pubmed: [Author and Title](#)

Google Scholar: [Author Only Title Only Author and Title](#)

**Sierla M, Waszczak C, Vahisalu T, Kangasjärvi J (2016) Reactive oxygen species in the regulation of stomatal movements. Plant Physiol 171: 1569–80**

Pubmed: [Author and Title](#)

Google Scholar: [Author Only Title Only Author and Title](#)

**Smith DK, Jones DM, Lau JBR, Cruz ER, Brown E, Harper JF, Wallace IS (2018) A putative protein O-fucosyltransferase facilitates pollen tube penetration through the stigma–style interface. Plant Physiol 176: 2804–2818**

Pubmed: [Author and Title](#)

Google Scholar: [Author Only Title Only Author and Title](#)

**Strasser R (2016) Plant protein glycosylation. Glycobiology 26: 926–939**

Pubmed: [Author and Title](#)

Google Scholar: [Author Only Title Only Author and Title](#)

**Strasser R, Altmann F, Mach L, Glössl J, Steinkellner H (2004) Generation of Arabidopsis thaliana plants with complex N-glycans lacking  $\beta$ 1,2-linked xylose and core  $\alpha$ 1,3-linked fucose. FEBS Lett 561: 132–136**

Pubmed: [Author and Title](#)

Google Scholar: [Author Only Title Only Author and Title](#)

**Sun H, Schneeberger K (2015) Shoremap v3.0: fast and accurate identification of causal mutations from forward genetic screens. Methods Mol Biol 1284: 381–395**

Pubmed: [Author and Title](#)

Google Scholar: [Author Only Title Only Author and Title](#)

**Takano J, Noguchi K, Yasumori M, Kobayashi M, Gajdos Z, Miwa K, Hayashi H, Yoneyama T, Fujiwara T (2002) Arabidopsis boron transporter for xylem loading. Nature 420: 337–340**

Pubmed: [Author and Title](#)

Google Scholar: [Author Only Title Only Author and Title](#)

**Tamura K, Shimada T, Kondo M, Nishimura M, Hara-Nishimura I (2005) KATAMARI1/MURUS3 is a novel Golgi membrane protein that is required for endomembrane organization in Arabidopsis. Plant Cell 17: 1764–1776**

Pubmed: [Author and Title](#)

Google Scholar: [Author Only](#) [Title Only](#) [Author and Title](#)

**Tryfona T, Theys TE, Wagner T, Stott K, Keegstra K, Dupree P (2014) Characterisation of FUT4 and FUT6  $\alpha$ -(1 $\rightarrow$ 2)-fucosyltransferases reveals that absence of root arabinogalactan fucosylation increases Arabidopsis root growth salt sensitivity. PLoS One 9: e93291**

Pubmed: [Author and Title](#)

Google Scholar: [Author Only](#) [Title Only](#) [Author and Title](#)

**Vahisalu T, Kollist H, Wang Y-F, Nishimura N, Chan W-Y, Valerio G, Lamminmäki A, Brosché M, Moldau H, Desikan R, et al (2008) SLAC1 is required for plant guard cell S-type anion channel function in stomatal signalling. Nature 452: 487–91**

Pubmed: [Author and Title](#)

Google Scholar: [Author Only](#) [Title Only](#) [Author and Title](#)

**Vahisalu T, Puzõrjova I, Brosché M, Valk E, Lepiku M, Moldau H, Pechter P, Wang Y-S, Lindgren O, Salojärvi J, et al (2010) Ozone-triggered rapid stomatal response involves the production of reactive oxygen species, and is controlled by SLAC1 and OST1. Plant J 62: 442–453**

Pubmed: [Author and Title](#)

Google Scholar: [Author Only](#) [Title Only](#) [Author and Title](#)

**Vainonen JP, Kangasjärvi J (2014) Plant signalling in acute ozone exposure. Plant Cell Environ 38: 240–52**

Pubmed: [Author and Title](#)

Google Scholar: [Author Only](#) [Title Only](#) [Author and Title](#)

**Vanzin GF, Madson M, Carpita NC, Raikhel N V., Keegstra K, Reiter WD (2002) The mur2 mutant of Arabidopsis thaliana lacks fucosylated xyloglucan because of a lesion in fucosyltransferase AtFUT1. PNAS 99: 3340–3345**

Pubmed: [Author and Title](#)

Google Scholar: [Author Only](#) [Title Only](#) [Author and Title](#)

**Verger S, Chabout S, Gineau E, Mouille G (2016) Cell adhesion in plants is under the control of putative O-fucosyltransferases. Development 143: 2536–40**

Pubmed: [Author and Title](#)

Google Scholar: [Author Only](#) [Title Only](#) [Author and Title](#)

**Voxeur A, Soubigou-Taconnat L, Legée F, Sakai K, Antelme S, Durand-Tardif M, Lapiere C, Sibout R (2017) Altered lignification in mur1-1 a mutant deficient in GDP-L-fucose synthesis with reduced RG-II cross linking. PLoS One 12: e0184820**

Pubmed: [Author and Title](#)

Google Scholar: [Author Only](#) [Title Only](#) [Author and Title](#)

**Waszczak C, Carmody M, Kangasjärvi J (2018) Reactive oxygen species in plant signaling. Annu Rev Plant Biol 69: 209–236**

Pubmed: [Author and Title](#)

Google Scholar: [Author Only](#) [Title Only](#) [Author and Title](#)

**Waters MT, Gutjahr C, Bennett T, Nelson DC (2017) Strigolactone signaling and evolution. Annu Rev Plant Biol 68: 291–322**

Pubmed: [Author and Title](#)

Google Scholar: [Author Only](#) [Title Only](#) [Author and Title](#)

**Wilson IB, Rendić D, Freilinger A, Dumić J, Altmann F, Mucha J, Müller S, Hauser MT (2001) Cloning and expression of cDNAs encoding  $\alpha$ 1,3-fucosyltransferase homologues from Arabidopsis thaliana. Biochim Biophys Acta 1527: 88–96**

Pubmed: [Author and Title](#)

Google Scholar: [Author Only](#) [Title Only](#) [Author and Title](#)

**Woolfenden HC, Baillie AL, Gray JE, Hobbs JK, Morris RJ, Fleming AJ (2018) Models and mechanisms of stomatal mechanics. Trends Plant Sci 23: 822–832**

Pubmed: [Author and Title](#)

Google Scholar: [Author Only](#) [Title Only](#) [Author and Title](#)

**Woolfenden HC, Bourdais G, Kopischke M, Miedes E, Molina A, Robatzek S, Morris RJ (2017) A computational approach for inferring the cell wall properties that govern guard cell dynamics. Plant J 92: 5–18**

Pubmed: [Author and Title](#)

Google Scholar: [Author Only](#) [Title Only](#) [Author and Title](#)

**Wu F, Chi Y, Jiang Z, Xu Y, Xie L, Huang F, Wan D, Ni J, Yuan F, Wu X, et al (2020) Hydrogen peroxide sensor HPCA1 is an LRR receptor kinase in Arabidopsis. Nature 578: 1–5**

Pubmed: [Author and Title](#)

Google Scholar: [Author Only](#) [Title Only](#) [Author and Title](#)

**Wu Y, Williams M, Bernard S, Driouch A, Showalter AM, Faik A (2010) Functional identification of two nonredundant Arabidopsis  $\alpha$ (1,2)fucosyltransferases specific to arabinogalactan proteins. J Biol Chem 285: 13638–13645**

Pubmed: [Author and Title](#)

Google Scholar: [Author Only](#) [Title Only](#) [Author and Title](#)

**Yang Y, Costa A, Leonhardt N, Siegel RS, Schroeder JI (2008) Isolation of a strong Arabidopsis guard cell promoter and its potential as a research tool. Plant Methods 4: 6**

Pubmed: [Author and Title](#)

Google Scholar: [Author Only](#) [Title Only](#) [Author and Title](#)

**Yoshida R, Hobo T, Ichimura K, Mizoguchi T, Takahashi F, Aronso J, Ecker JR, Shinozaki K (2002) ABA-activated SnRK2 protein kinase is required for dehydration stress signaling in Arabidopsis. Plant Cell Physiol 43: 1473–83**

Pubmed: [Author and Title](#)

Google Scholar: [Author Only](#) [Title Only](#) [Author and Title](#)

**Zabackis E, York WS, Pauly M, Hantus S, Reiter W-D, Chapple CCS, Albersheim P, Darvill A (1996) Substitution of L-Fucose by L-Galactose in cell walls of Arabidopsis mur1. Science 272: 1808–1810**

Pubmed: [Author and Title](#)

Google Scholar: [Author Only](#) [Title Only](#) [Author and Title](#)

**Zeng W, Brutus A, Kremer JM, Withers JC, Gao X, Da Jones AD, He SY (2011) A genetic screen reveals Arabidopsis Stomatal and/or apoplastic defenses against Pseudomonas syringae pv. tomato DC3000. PLoS Pathog 7: e1002291**

Pubmed: [Author and Title](#)

Google Scholar: [Author Only](#) [Title Only](#) [Author and Title](#)

**Zentella R, Sui N, Barnhill B, Hsieh W-P, Hu J, Shabanowitz J, Boyce M, Olszewski NE, Zhou P, Hunt DF, et al (2017) The Arabidopsis O-fucosyltransferase SPINDLY activates nuclear growth repressor DELLA. Nat Chem Biol 13: 479–485**

Pubmed: [Author and Title](#)

Google Scholar: [Author Only](#) [Title Only](#) [Author and Title](#)

**Zhang L, Paasch BC, Chen J, Day B, He SY (2019) An important role of L-fucose biosynthesis and protein fucosylation genes in Arabidopsis immunity. New Phytol 222: 981–994**

Pubmed: [Author and Title](#)

Google Scholar: [Author Only](#) [Title Only](#) [Author and Title](#)
